# Supplementary material
Source: PubMed Central journal article supplement (PMC3741661)
Supplement: NIHMS487085-supplement-Supp.pdf [file NIHMS487085-supplement-Supp.pdf]

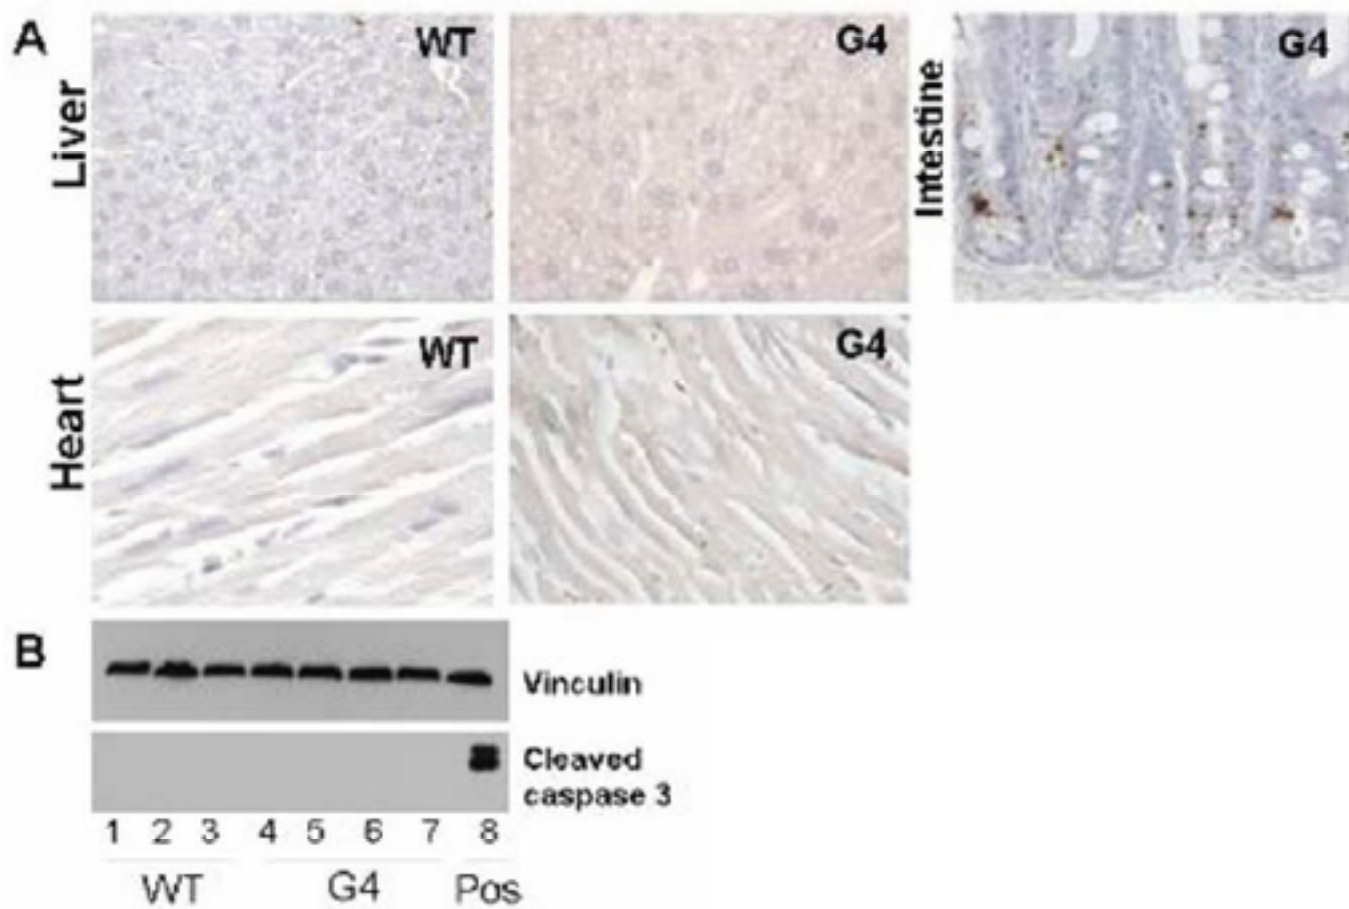

**Supp. Fig. 1 G4 liver and heart tissues do not have significant Apoptosis** (A) TUNEL staining in liver and heart tissue from 12 week old WT and G4 mice shows no significant apoptosis; right positive control (G4 intestine). (B) Western blot in liver samples from 3 WT and 3 G4 mice shows no cleaved caspase signal indicative of apoptosis (right positive control).

## Microarray analysis

## RT-qPCR validation

HSC

| OXPHOS- COMPLEX |      |       |        |        |
|-----------------|------|-------|--------|--------|
| I               | II   | III   | IV     | V      |
| ND4             | SDHB | UQCRB | COX5A  | ATP5G3 |
| ND5             |      |       | COX6A1 | ATP5A1 |
|                 |      |       | COX6B1 |        |

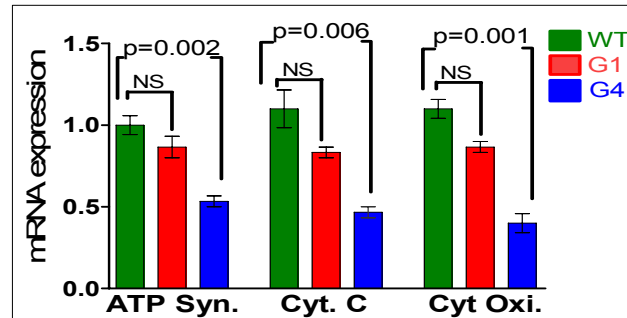

Liver

| OXPHOS- COMPLEX |      |       |        |        |
|-----------------|------|-------|--------|--------|
| I               | II   | III   | IV     | V      |
| NDUFA3          | SDHA | UCRC  | COX15  | ATP5F1 |
| NDUFA4          | SDHB | UHRF1 | COX5B  | ATP5H  |
| NDUFA6          | SDHC | UQCR  | COX6B1 | ATP5J2 |
| NDUFA7          | SDHD | UQCRB | COX7C  |        |
| NDUFA13         |      | UQCRC | COX8A  |        |
| NDUFA9          |      | UQCRQ |        |        |
| NDUFAB          |      |       |        |        |
| NDUFB2          |      |       |        |        |
| NDUFB8          |      |       |        |        |
| NDUFB9          |      |       |        |        |

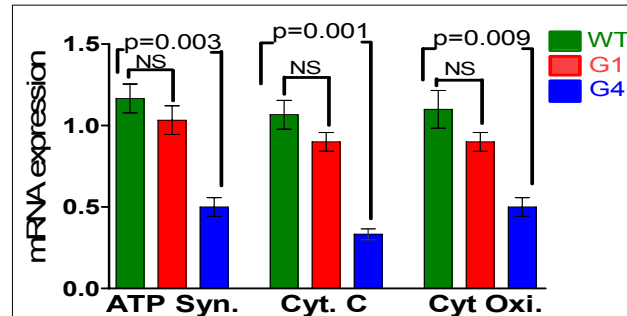

Heart

| OXPHOS- COMPLEX |      |       |        |        |
|-----------------|------|-------|--------|--------|
| I               | II   | III   | IV     | V      |
| NDUFA12         | SDHC | UCRC  | COX17  | ATP5F1 |
| NDUFB6          | SDHD | UHRF1 | COX10  |        |
| NDUFS7          |      | UQCR  | COX5A  |        |
|                 |      | UQCRB | COX6B1 |        |
|                 |      | UQCRC | COX7A2 |        |
|                 |      | UQCRQ |        |        |

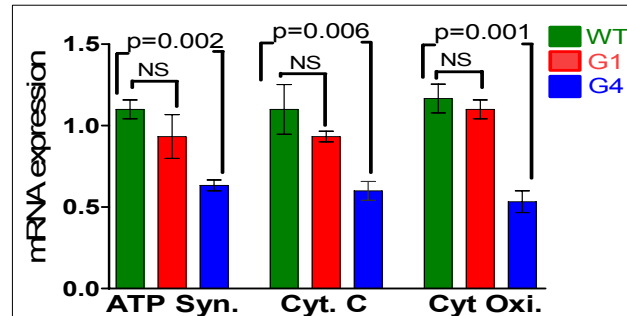

## Supp. Fig. 2 G4 tissues show repression of OXPHOS genes

Microarray analysis based IPA list of repressed genes in the OXPHOS pathway include members of all 5 complexes (left), RT-qPCR (n=5-8 per group) validation of selected OXPHOS genes (ATP synthase, Cytochrome C and Cytochrome C oxidase) in WT, G1 and G4 HSC, liver and heart. T-test was used for statistical analysis and error bars represent s.e.m.

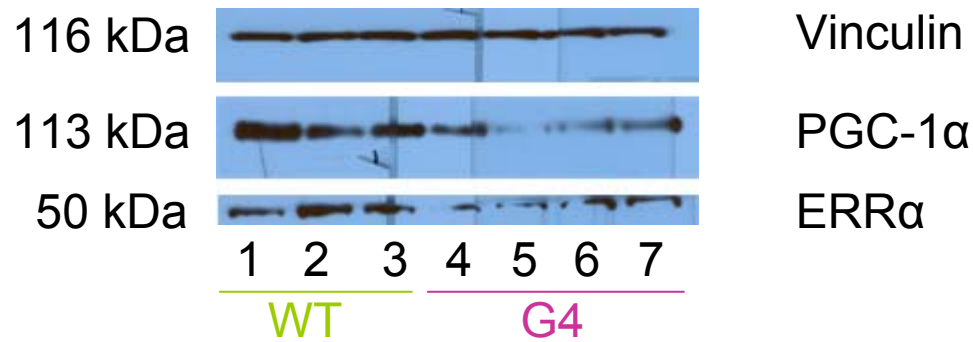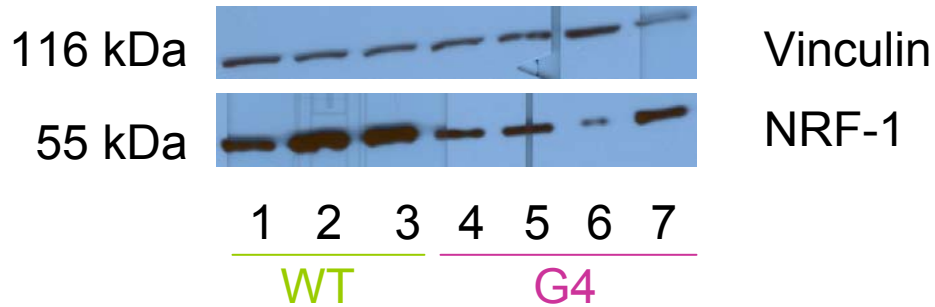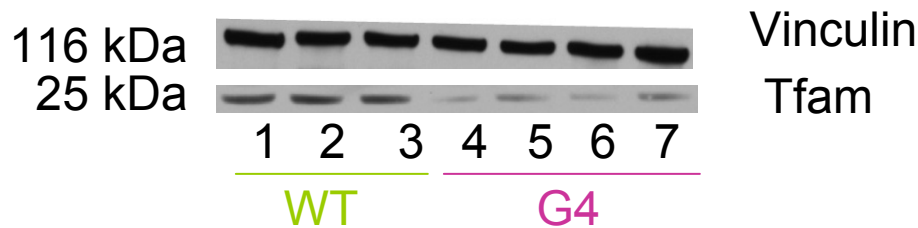

**Supp. Fig. 3 PGC-1α and downstream targets are repressed at the protein level in G4 mice** Western blot analysis of 3 WT (1-3) and 4 G4 (4-7) liver lysates for the indicated proteins.

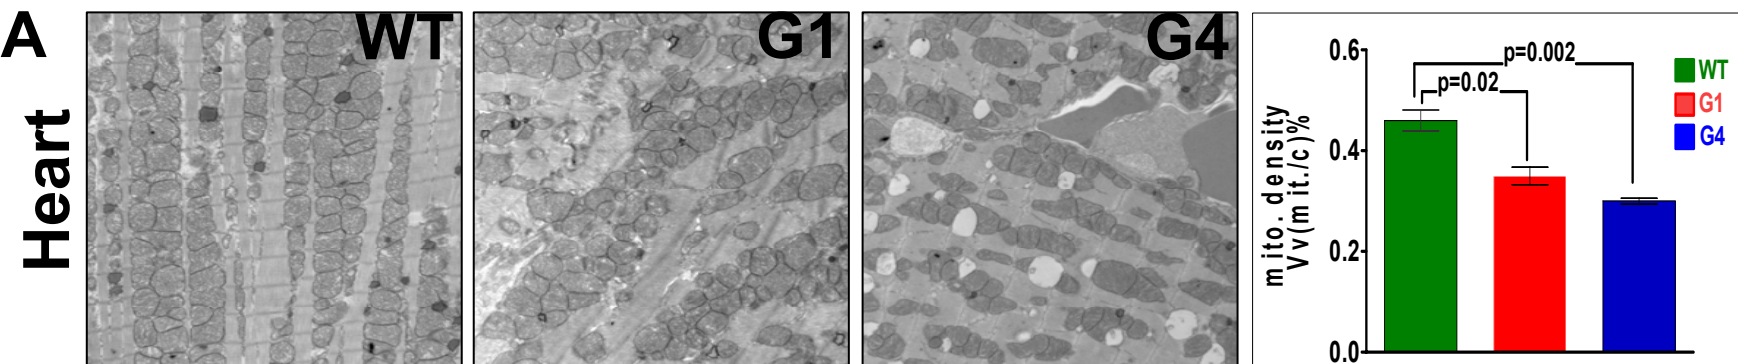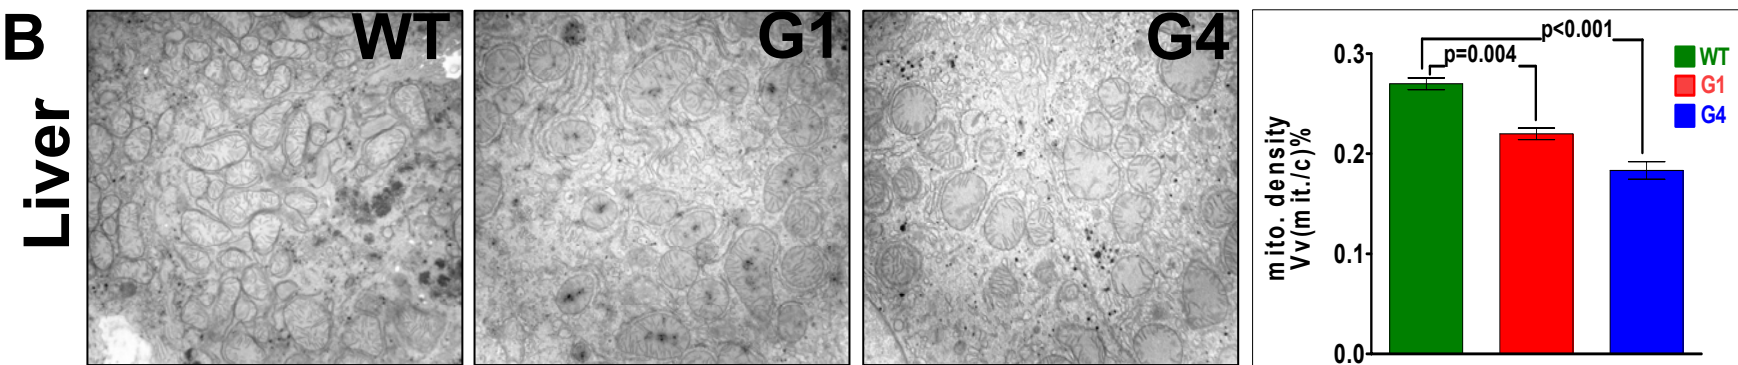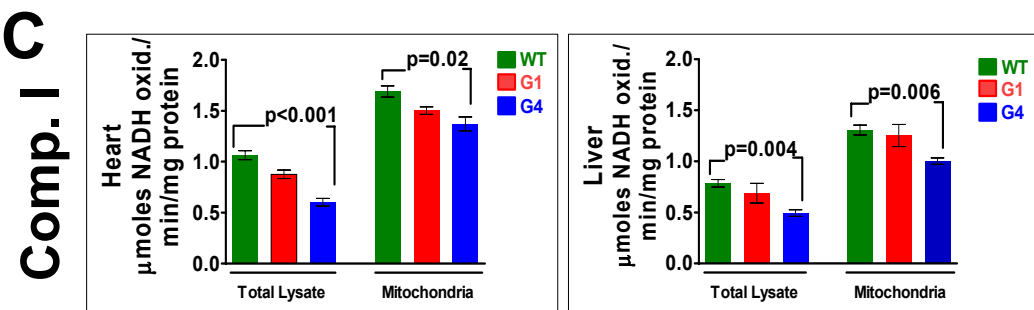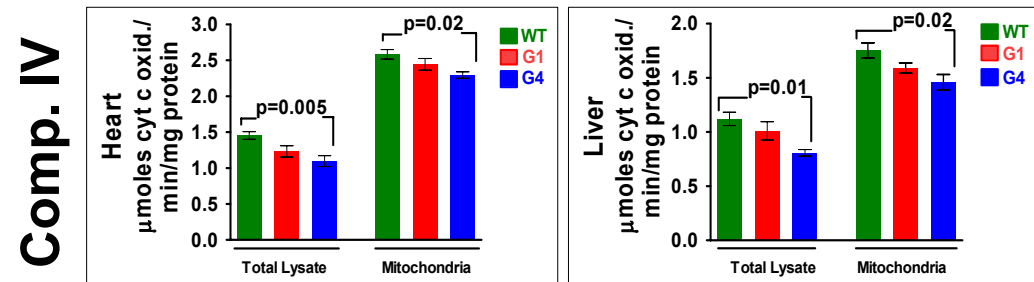

Supp. Fig. 4

**Supp. Fig. 4 Telomere dysfunction is associated with reduced mitochondrial density and repressed complex activities in liver and heart tissue** (4A) and (4B) Representative electron microscopy pictures used for stereotactical mitochondrial quantification of WT, G1, G4 heart (4A) and liver (4B) tissue (n=3). Mitochondrial volume density (Vv) was calculated by the point-method by two independent investigators from 10 different tissue sections (total of 30 tissue sections per genotype). (4C) Enzymatic activities of mitochondrial respiratory chain complexes I (top) and IV was determined spectrophotometrically in liver and heart lysates and isolated mitochondria from WT, G1 and G4 mice (n= 3- 5 per genotype, student's t-test, error bars represent s.e.m.).

**A****Liver**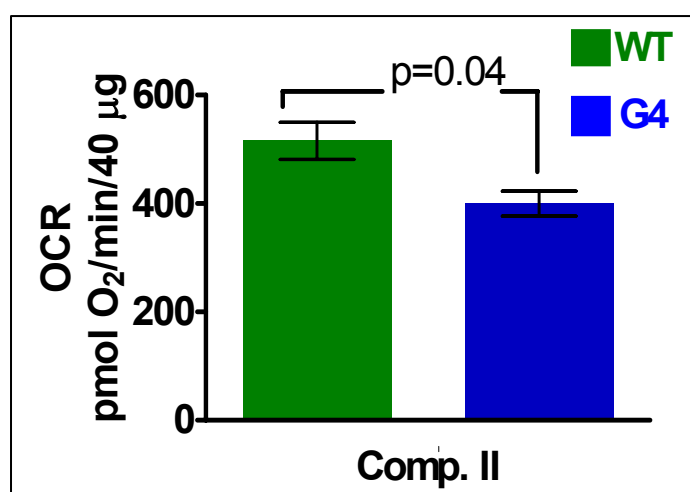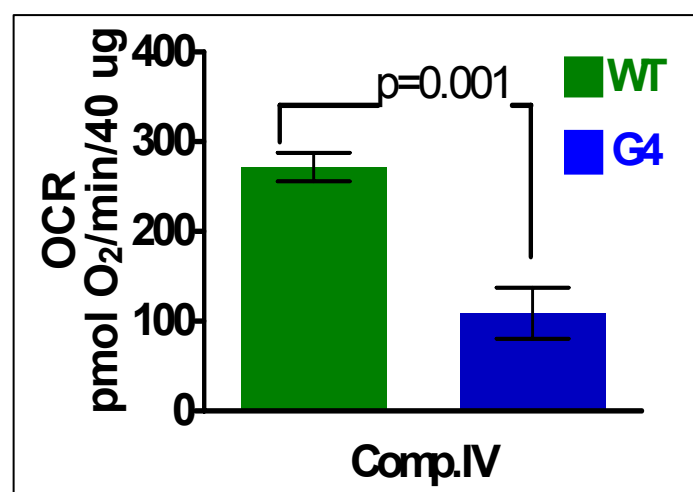**Heart**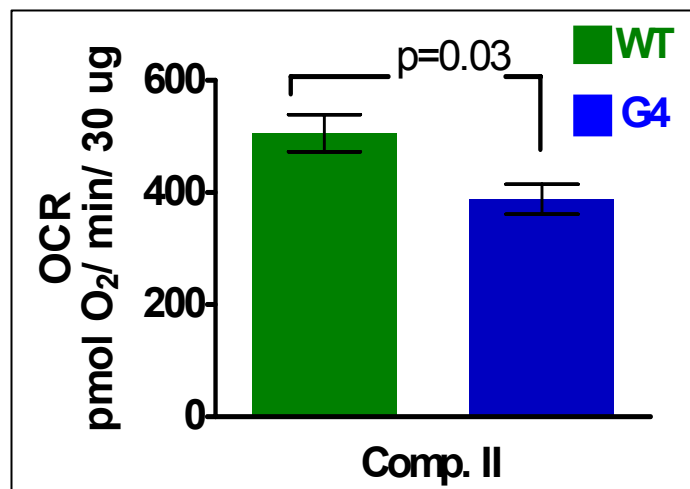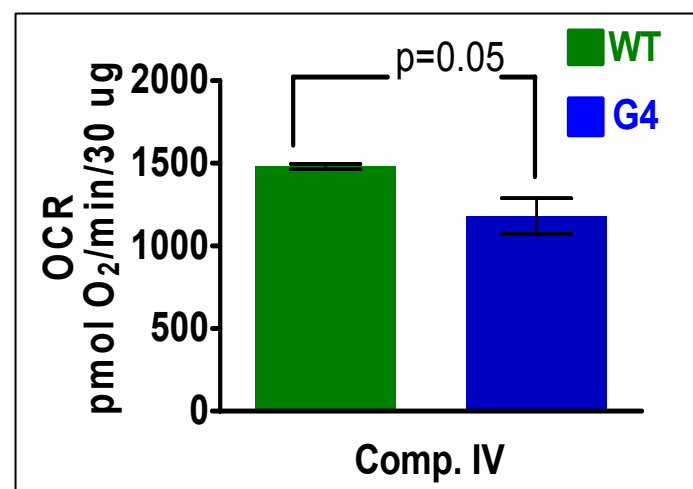**B****Liver**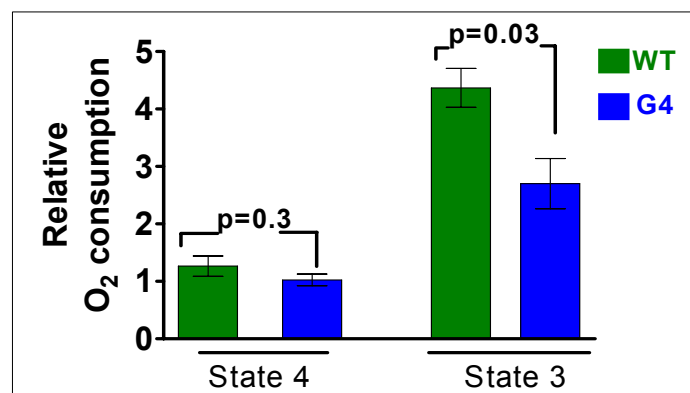**Supp. Fig. 5**

**Supp. Fig. 5 Complex II and complex IV driven respiration is impaired in G4 heart and liver mitochondria** (A) Complex II driven respiration was measured in isolated mitochondria from liver (top left panel, 40  $\mu\text{g}$  per well) or heart (bottom left, 30  $\mu\text{g}$  per well) by inducing state III with 5 mM succinate, 2  $\mu\text{M}$  rotenone (complex I inhibitor) and 250  $\mu\text{M}$  ADP. Complex IV driven respiration was measured in isolated mitochondria from liver (top right panel, 40  $\mu\text{g}$ ) or in isolated mitochondria from heart (bottom right panel, 30  $\mu\text{g}$ ) by electron delivery to complex IV through addition of 10 mM Ascorbate, 100  $\mu\text{M}$  TMPD (and after inhibition of complex III by incubating mitochondria with antimycin A 4  $\mu\text{M}$ ). Reported are oxygen consumption rates (OCR, pmols  $\text{O}_2$  per minute per 30 or 40  $\mu\text{g}$  protein) of isolated mitochondria from 4-5 WT and 4-5 G4 mice with 3-4 replicates per mouse). The statistical significance was calculated by unpaired t-test (error bars represent s.e.m.). B) Relative  $\text{O}_2$  consumption measured by Clark electrode in isolated liver mitochondria from W, G1 and G4 mice in state 3 and state 4. State 3 respiration was measured with 5 mM glutamate and 5 mM malate in the presence of 2.5 mM ADP. State 4 respiration was measured following ADP consumption (n=3 per genotype). Respiration due to proton leak was determined using 0.5  $\mu\text{M}$  oligomycin. This was subtracted from non-mitochondrial respiration using 20  $\mu\text{M}$  myxothiazol. No difference in proton leak was detected.



**A**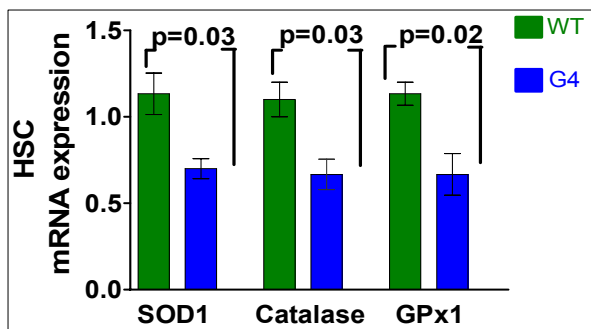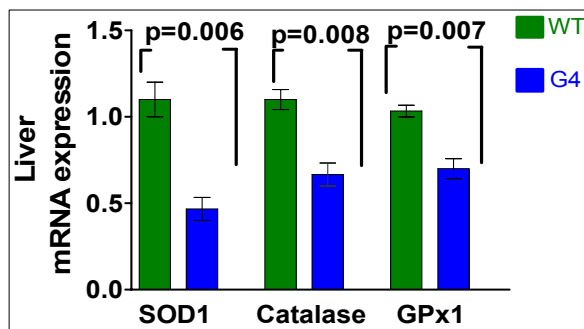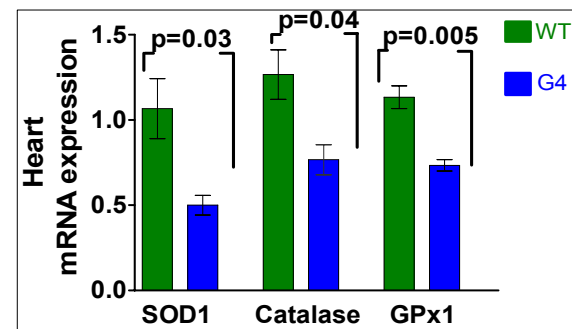**B**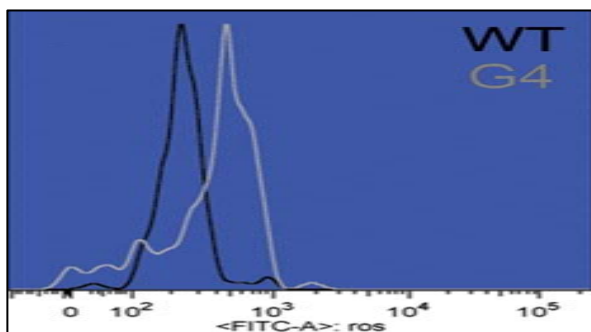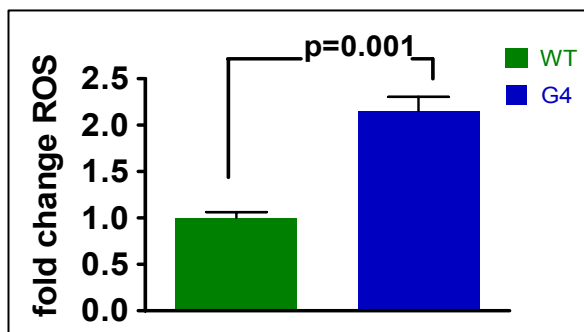**C**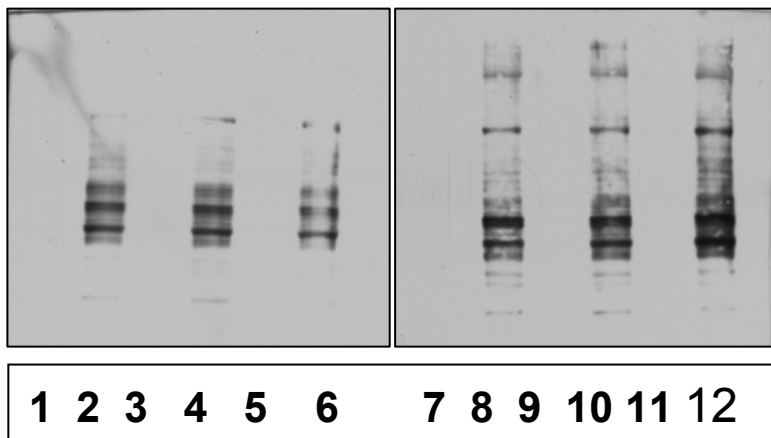

**D**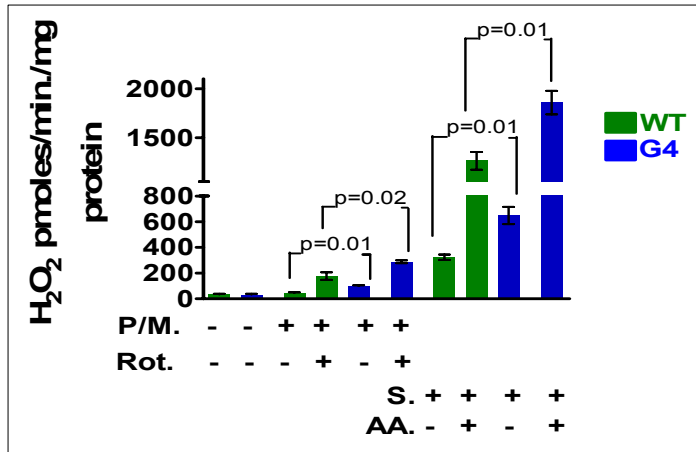**E**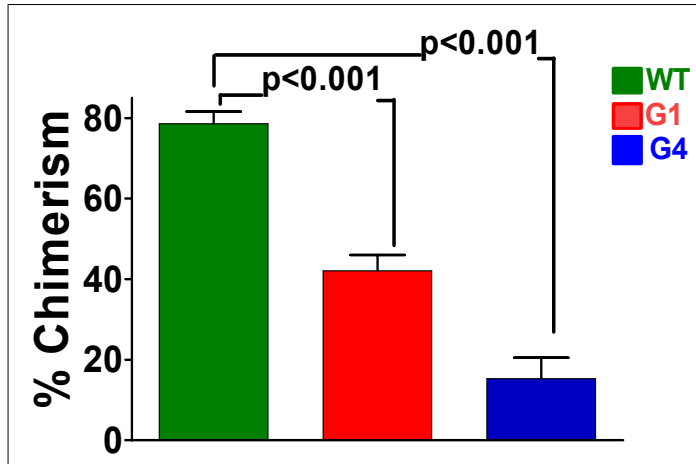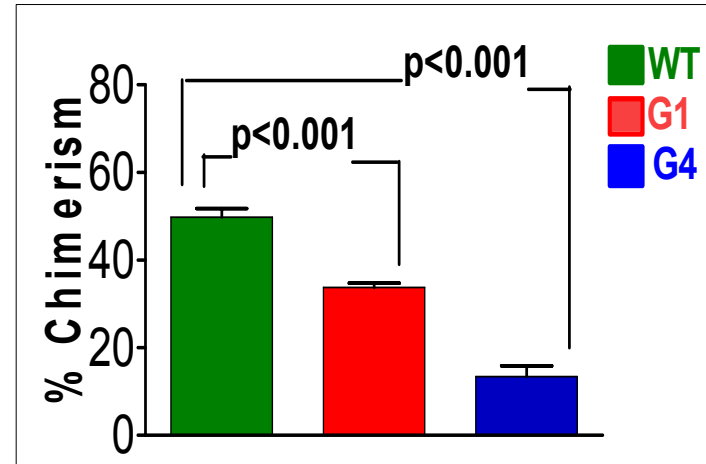

## **Supp. Fig. 6 G4 mice have decreased ROS defense genes and increased mitochondrial ROS synthesis**

(A) Expression of anti-oxidants in WT and G4 HSC, liver and heart by RT-qPCR (n=3); (B) ROS levels in WT and G4 HSC determined by CM-H<sub>2</sub>DFCDA staining and FACS analysis, ROS Histogram (left) and fold change (right), (n=5);(C) Levels of carbonylated proteins in liver lysates from WT (1-6;1,3 and 5 are negative controls) and G4 mice (7-12;7,9,11 are negative controls for each sample (n=3); (D) H<sub>2</sub>O<sub>2</sub> synthesis rate in isolated heart mitochondria (30μg per well) in the presence of complex I substrates pyruvate/malate (5mM each) and succinate (5mM). The rates of H<sub>2</sub>O<sub>2</sub> increases significantly in the presence of complex I (rotenone, 0.5μM) or complex III (antimycin A, 0.5μM) inhibitors. Note the increased rates of H<sub>2</sub>O<sub>2</sub> production in G4 heart mitochondria (n=3 per group and duplicates per samples were analyzed) .The synthesis rate is reported as H<sub>2</sub>O<sub>2</sub> pmol/min./mg protein;(E) Newborn WT, G1 and G4 mice were treated with NAC for 8 weeks prior to transplantation. Whole bone marrow (BM) (right panel) or isolated HSC (left panel) were used for competitive transplantation experiments. Note that there is no rescue of HSC failure in G1 or G4 mice with NAC.

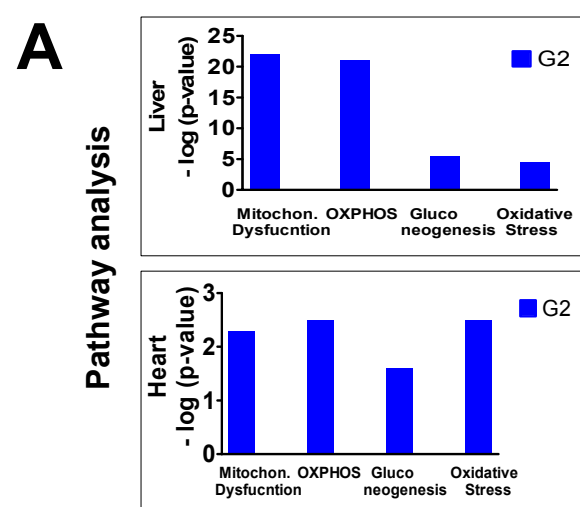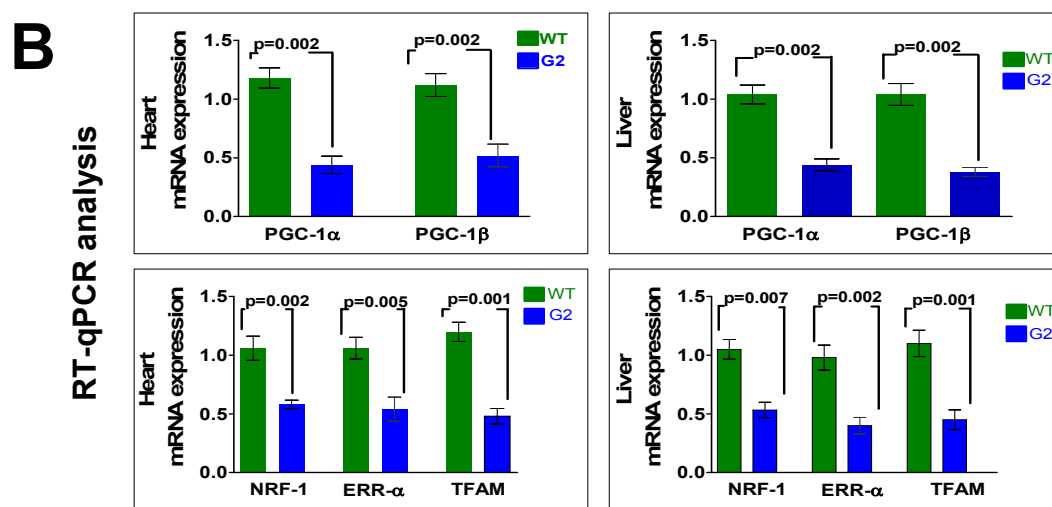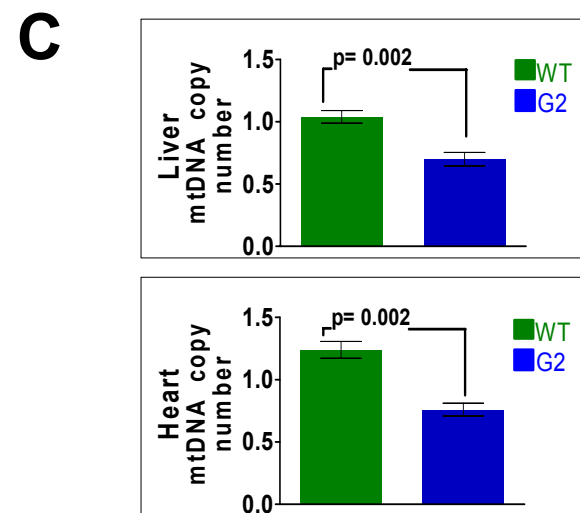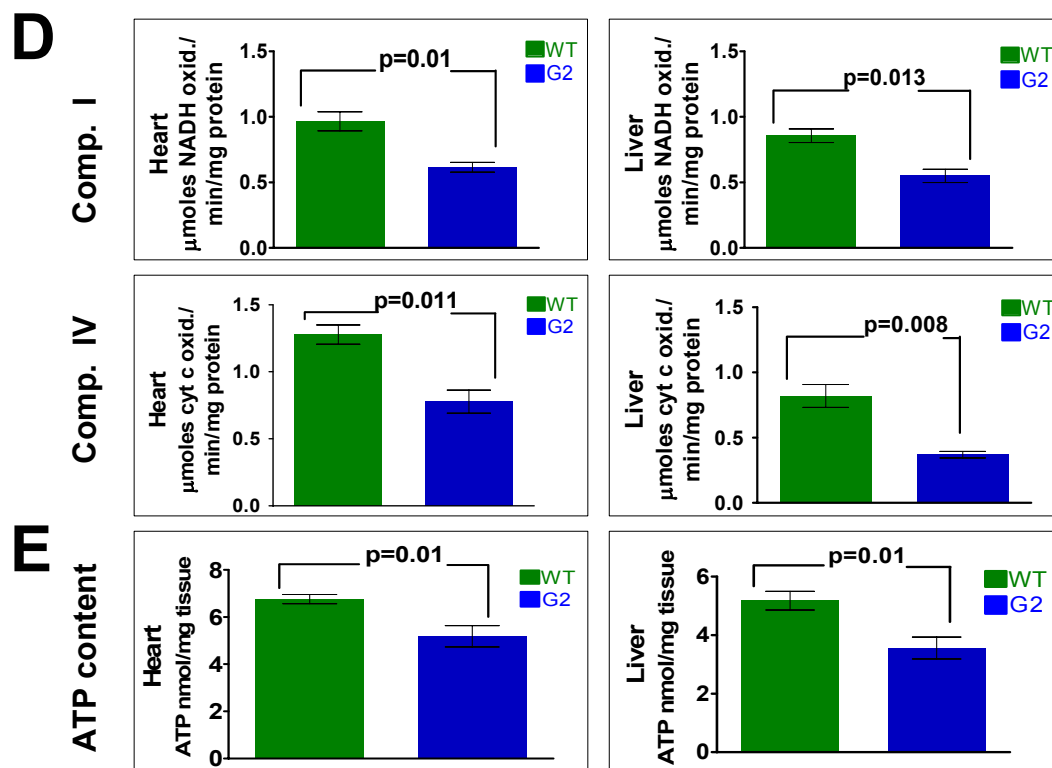

Supp. Fig. 7

**Supp. Fig. 7 Terc knock-out mice have similar mitochondrial related alterations as Tert knock-out mice.** (A) IPA analysis : RNA derived from age and sex matched WT or G2 mTerc knock out mice with dysfunctional telomeres was analyzed by SAM in liver followed by IPA analysis. Shown are the canonical pathways significantly repressed in G2 liver and heart tissues as compared to their wild type controls. Statistical analysis was performed with IPA and expressed as  $- (p\text{-log})$ , 5 livers and 5 hearts per genotype were analyzed. (B) RT-qPCR analysis of PGC-1 $\alpha$ , PGC-1 $\beta$  and transcriptional targets NRF-1, ERR $\alpha$ , Tfam in WT and G2 mTerc $^{-/-}$  livers and hearts (n=5).  $\Delta\Delta\text{CT}$  method was used to analyze RT-qPCR data. (C) Relative mitochondrial DNA copy number in heart and liver of WT and G2 mTerc knock-out mice was determined by qPCR using primers specific for mitochondrial DNA (COX I) and normalized to genomic DNA content ( $\beta$ -Globin). For heart and liver tissues 5 age and sex matched mice per group were analyzed in triplicates.  $\Delta\Delta\text{CT}$  method was used to analyze qPCR data. (D) Enzymatic activities of mitochondrial respiratory chain complexes I and IV was determined spectrophotometrically in liver and heart lysates from WT and G2 mice (n= 5 per genotype). (E) ATP content in freshly isolated liver and heart tissues of WT and G2 mice was determined by HPLC (n=5). Statistical significance for all experiments was determined by unpaired t-test from triplicate readings. Results are presented as mean  $\pm$  s.e.m.

**A**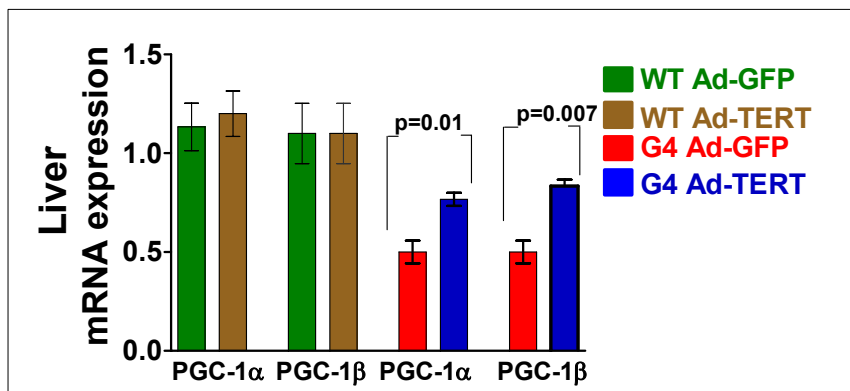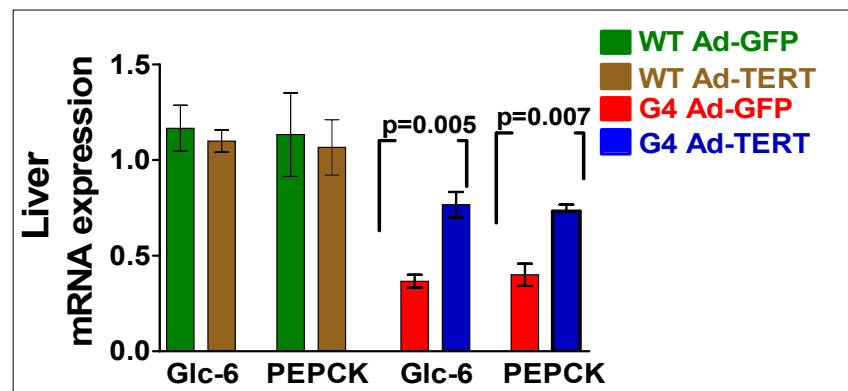**B**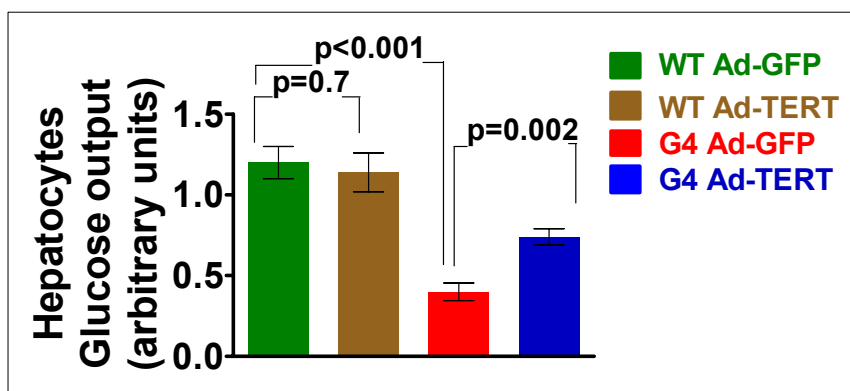**C**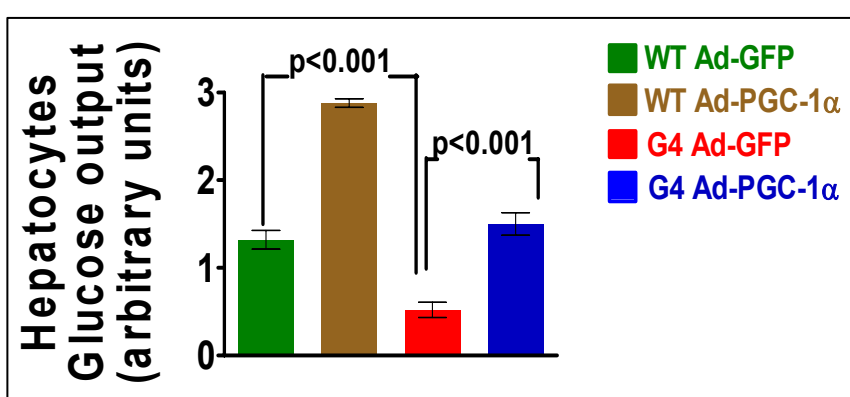

Supp. Fig. 8

**Supp. Fig. 8 Telomerase or PGC-1 $\alpha$  overexpression leads to increased expression of gluconeogenic genes and rescues the gluconeogenesis defect in G4 cultured hepatocytes** (A) Expression levels of PGC-1 $\alpha$  and PGC-1 $\beta$ , NRF-1, PPAR $\alpha$ , Glucose-6 phosphatase (Glc-6) and Phosphoenolpyruvate carboxykinase (Pepck) in liver of WT and G4 mice after Ad-GFP or Ad-TERT infection (n=5 per group). (B) Cultured hepatocytes were infected with Ad-GFP and Ad-TERT and glucose levels were determined 48 hrs later after normalization to protein content in the supernatant (n=5) (C) Cultured hepatocytes were infected with Ad-GFP and Ad-PGC-1 $\alpha$  (MOI 30) and glucose levels were determined 48 hrs later after normalization to protein content in the supernatant. Student t-test was used to calculate the statistical differences in all assays described and error bars represent s.e.m.

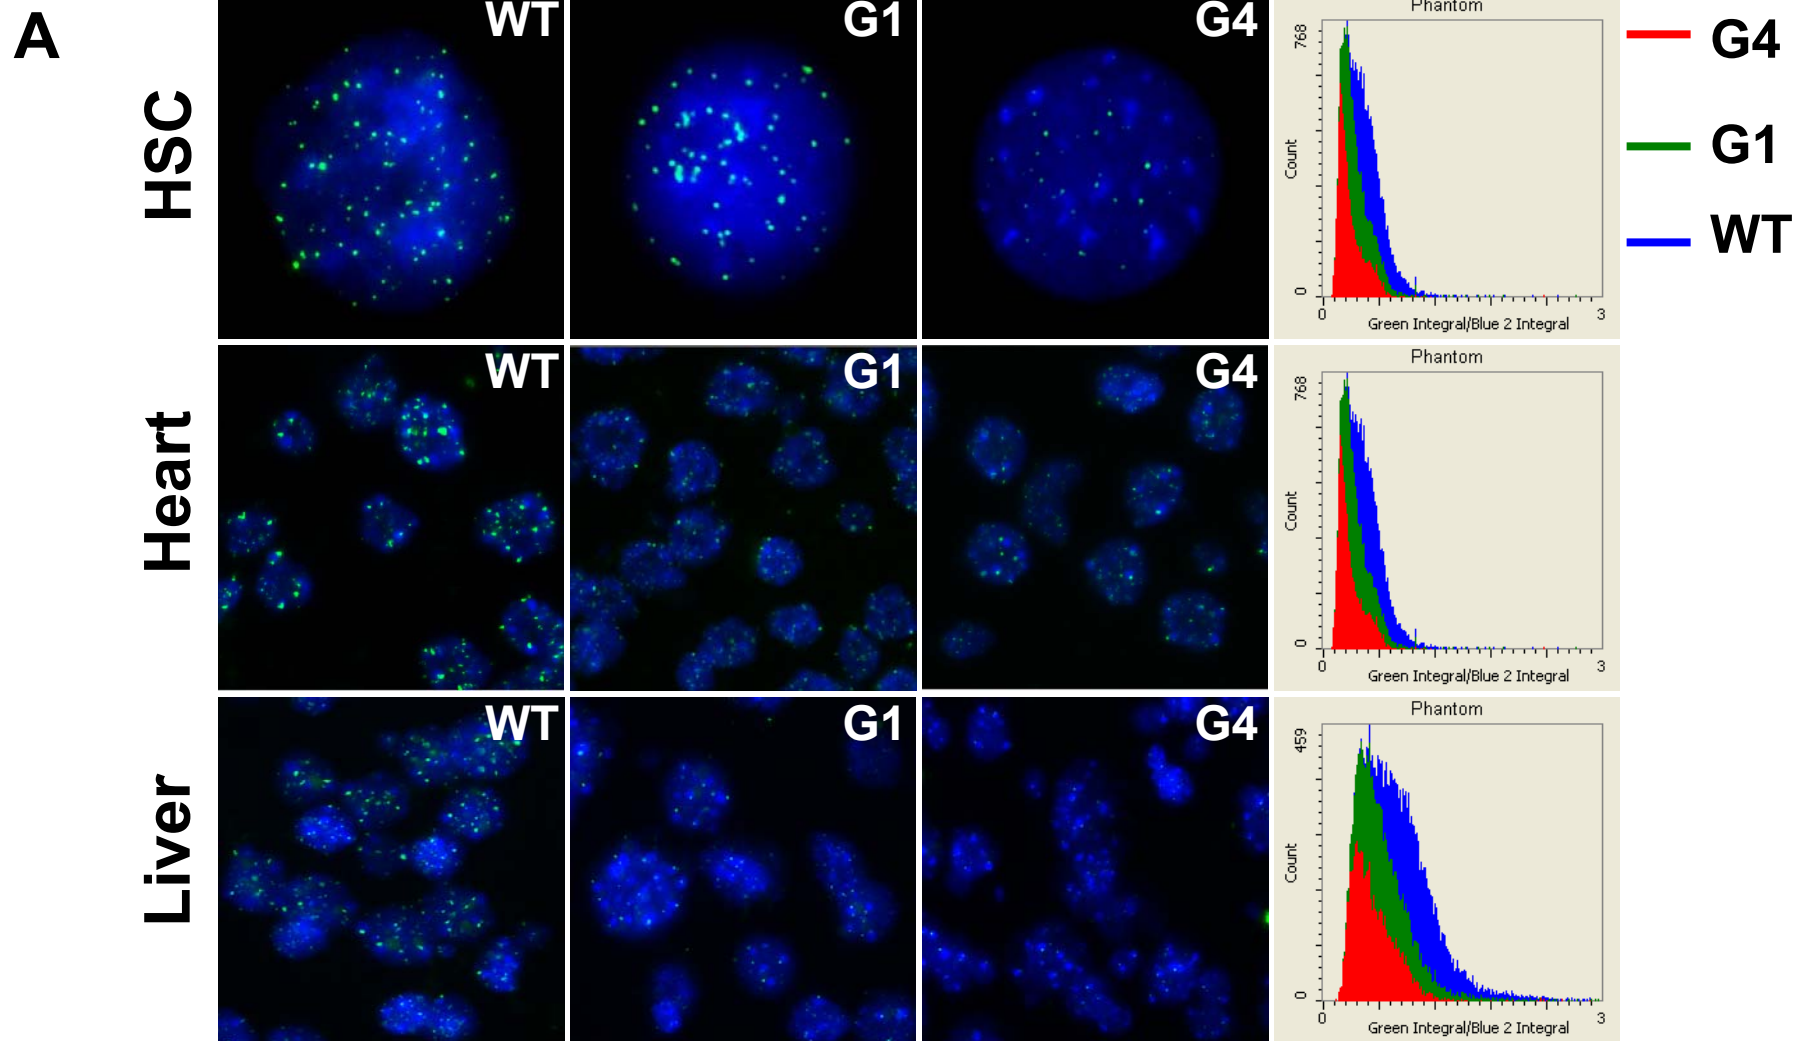

**Supp. Fig. 9**



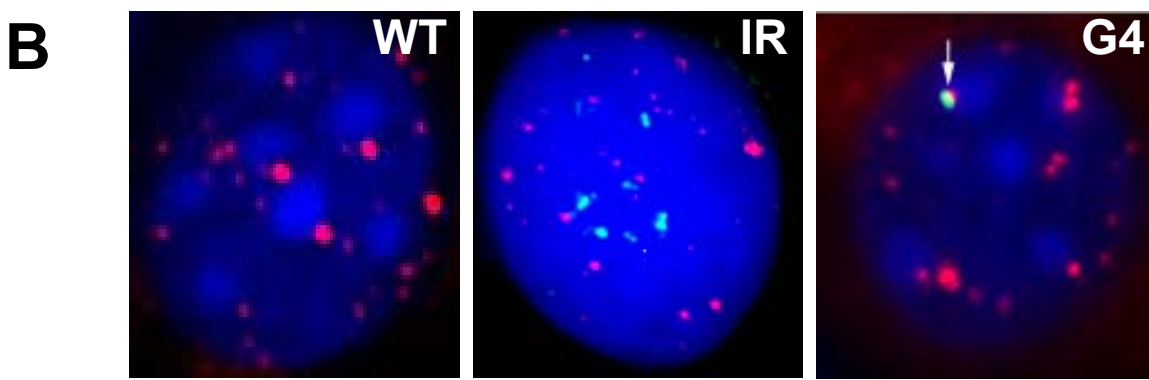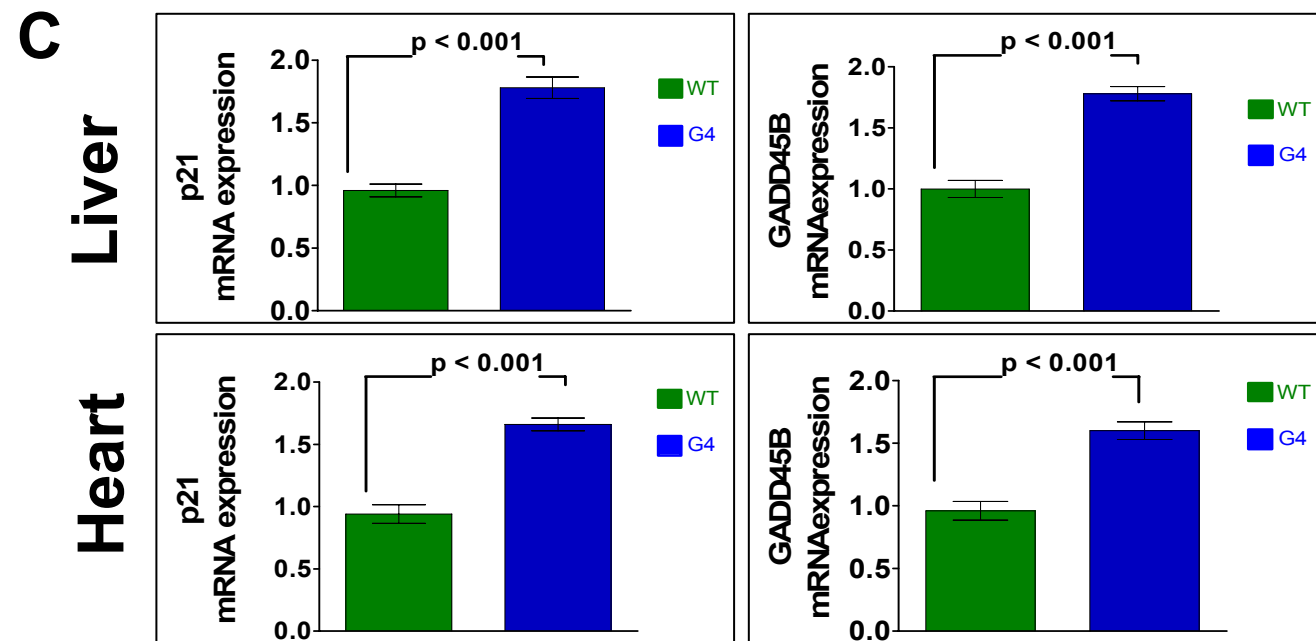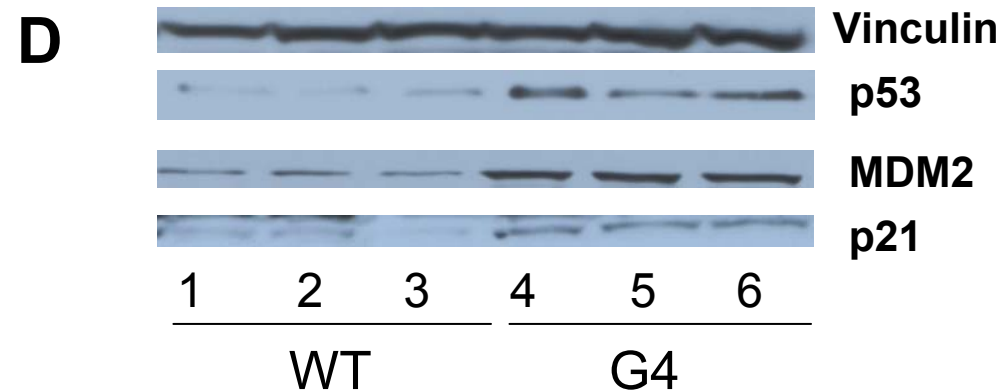

**Supp. Fig. 9**

## **Supp. Fig. 9 Telomere shortening in tissues is associated with DNA damage response and activation of p53 pathway**

(A) Analysis of telomere-FISH in FFPE tissue by laser scanning cytometry. DAPI normalized background corrected cell-centric telomere fluorescence frequency distribution plots for WT (blue), G1 (green), G4 (red) HSCs, heart and liver. Approximately 1500 cells were analyzed per sample. Note the decline in telomere length in G1 and much more pronounced in G4. In all cases, the difference between WT and G4 is significant ( $p < 0.001$ ). (B) Representative colocalization of 53BP-1 (arrow, green) with telomeres (red) in G4 liver (right) and absence thereof in WT (left) and irradiated mouse liver (IR, middle). (C) RT-qPCR analysis of p53 targets (p21, GADD45B) in hearts and livers from 5 WT and G4 mice ; (D) Western blot analysis of p53, p21 and MDM2 in liver lysates from 3 WT(1-3) and G4 (4-6) mice.

**A**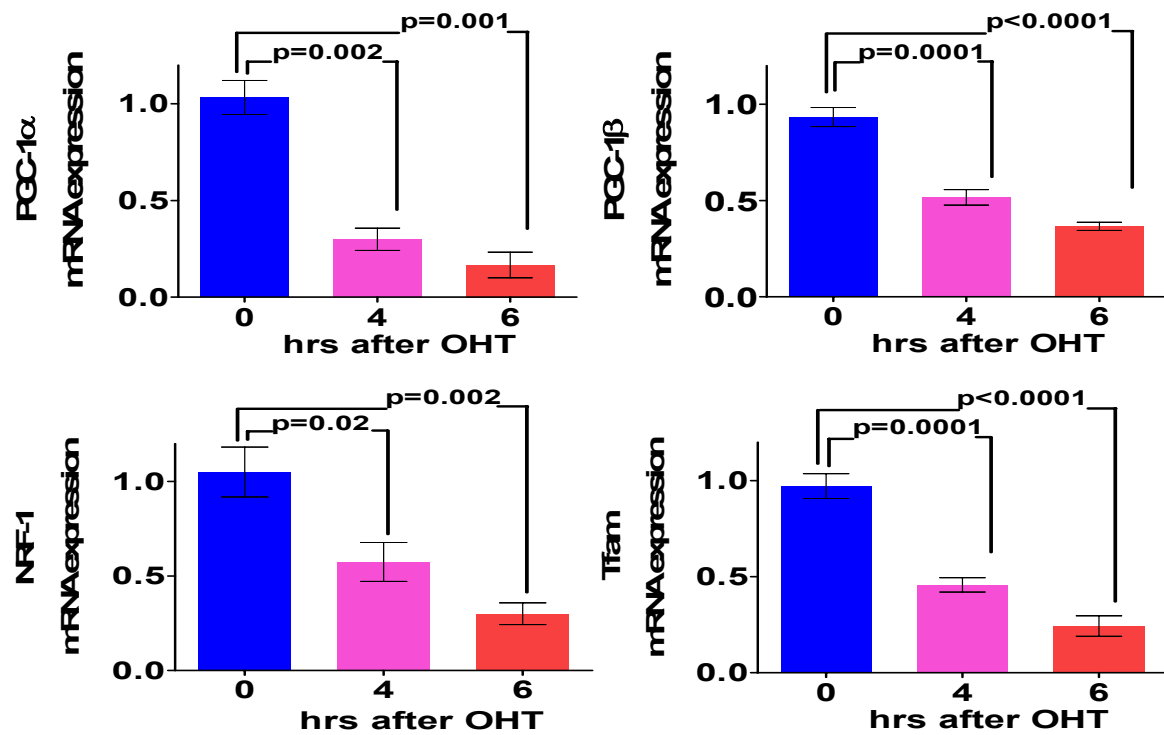**B**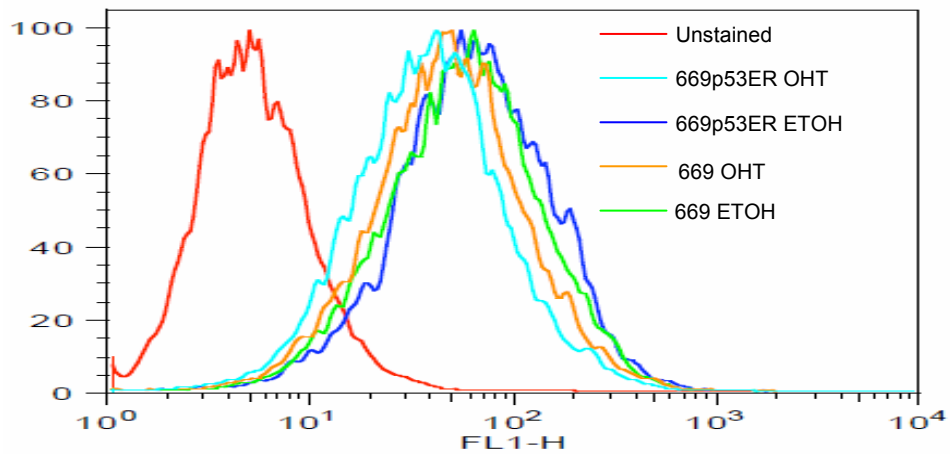

**Supp. Fig. 10 Activated p53 in G2 mTerc  $-/-$ , p53  $-/-$  mouse embryonic fibroblasts represses PGC-1 $\alpha$ , PGC-1 $\beta$ , NRF-1 and Tfam expression and leads to decreased mitochondrial biogenesis** (A) RT-qPCR analysis of G2 mTerc  $-/-$ , p53  $-/-$  mouse embryonic fibroblasts transfected with a p53-ER vector construct shows decreased PGC-1 $\alpha$  and PGC-1 $\beta$  expression and concurrent Nrf-1 and Tfam repression at 4 and 6 hours post induction with 4-Hydroxytamoxifen (OHT); (B) Decreased mitochondrial mass 48 hours after p53 activation. G2 mTerc  $-/-$ , p53  $-/-$  mouse embryonic fibroblasts (“669”) transfected with p53-ER vector construct (“669p53ER”) show decreased mitochondrial mass 48 hrs after activation of p53 by 4-Hydroxytamoxifen (669p53ER OHT) compared to either ethanol control (669p53ER ETOH) or non-transfected 669 cells treated with OHT or ethanol (669 OHT; 669 ETOH) .

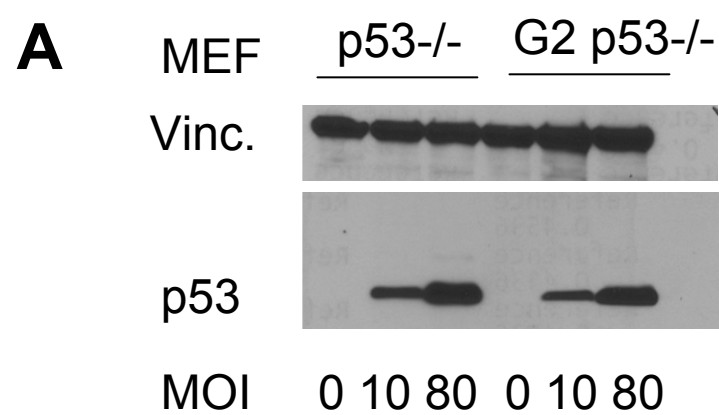

## ChIP

## RT-qPCR

**B**

p53<sup>-/-</sup>

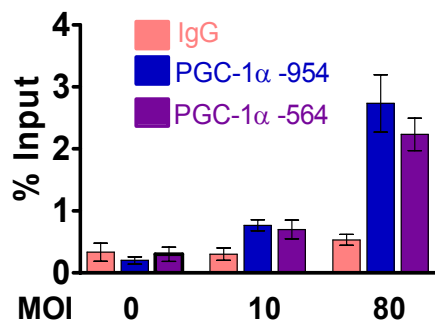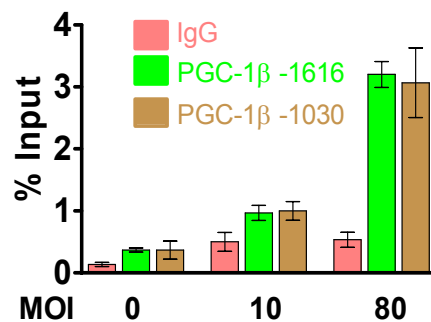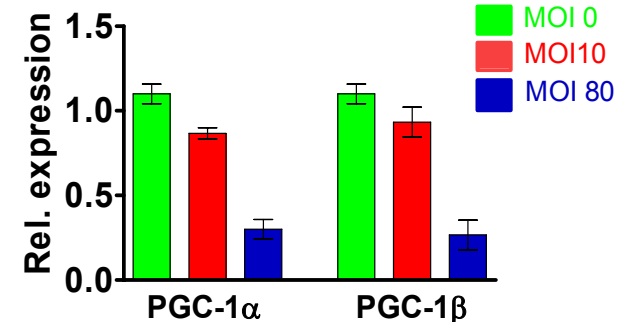

**C**

G2 p53<sup>-/-</sup>

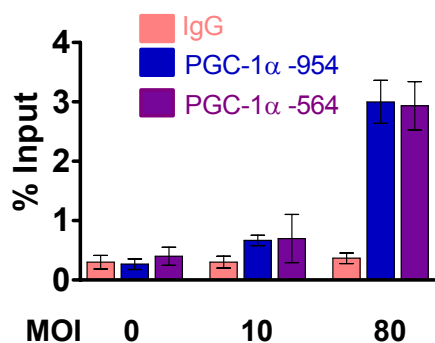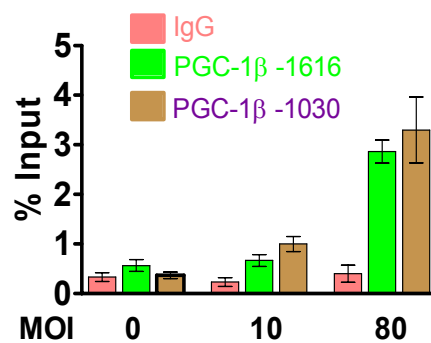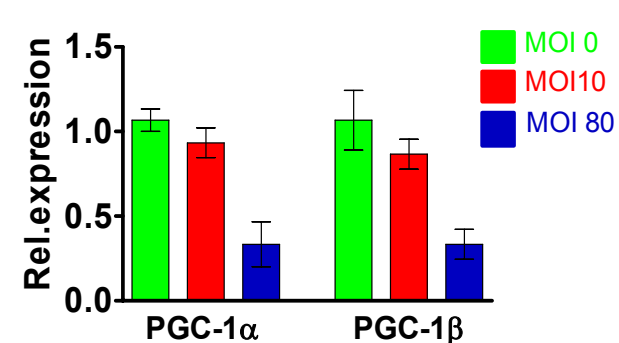

**Supp. Fig. 11 Increasing dosage of p53 leads to PGC promoter occupancy and repression of PGCs independent of telomere length**

- (A) Western blot analysis of p53 <sup>-/-</sup> (left) and G2 p53 <sup>-/-</sup> MEFs transduced with Ad-p53 (MOI 0, 10 and 80)
- (B) ChIP showing the binding of exogenous p53 on the promoters of PGC-1 $\alpha$  and PGC-1 $\beta$  at two different sites respectively with increasing p53 levels in p53<sup>-/-</sup> MEFs . Results are expressed as % Input after qPCR analysis. Increased promoter occupancy is associated with PGC repression as determined by qPCR analysis (right).
- (C) ChIP showing the binding of exogenous p53 on the promoters of PGC-1 $\alpha$  and PGC-1 $\beta$  at two different sites after transduction with Ad-p53 at different MOI. Fixed and shared DNA from G2 mTerc p53 <sup>-/-</sup> MEFs was immunoprecipitated with antibodies against p53 and control IgG. Note similar occupancy of promoters as in p53<sup>-/-</sup> MEFs after qPCR analysis and similar repression of transcription.

## Material and Methods

**Mice:** mTert deficient mice were generated as previously reported<sup>46</sup>. All mice used were backcrossed for 10 generations onto a C57/BL6 background (CD45.2). Tert deficient mice with decreasing telomere length were generated by continuous interbreeding of successive generations of Tert deficient (G1-G4) mice. Mice deficient for *mTerc* and *mTerc/p53* have been described and extensively characterized<sup>47,48</sup>. For all studies involving *mTert* and *mTerc/p53*, age and sex matched mice were used. Mice were maintained on standard rodent chow with 12-hlight-dark cycles. For transplant experiments, recipients were CD45.1 congenic mice, purchased from either Taconic or Jackson laboratories. All animal experiments were performed according to procedures approved by the Institutional Animal Care and Use Committee at the Dana-Farber Cancer Institute.

### **Flow cytometry and gene expression profile analysis:**

BD FACS Aria Cell flow cytometers were used for sorting and analysis. Conjugated antibodies and matched isotype controls were obtained from PharMingen or eBioscience. For transcriptome analysis, enriched HSCs from bone marrow cells of nine age (12-16 weeks, duplicate samples per group, total of 18 mice per group) and sex matched WT, G1 or G4 mice were pooled and hematopoietic stem cells (HSC, defined as ckit+, Sca1+, Lin- [KSL], CD34low/- bone marrow cells were isolated by FACS analysis as described<sup>49</sup>. DAPI negative KSL CD34low/negative cells were sorted into Eppendorf tubes and total RNA was isolated using the Pico Pure Isolation Kit (Arcuturus) according to the manufacturer's instructions.

Total RNA was reverse-transcribed and amplified with the WT-Ovation™ Pico RNA Amplification System at the Harvard Medical School and Partners HealthCare System Center for Genetics and Genomics (HPCGG).

Prior to hybridization the quality of amplified RNA was checked. In accordance with manufacturer protocols, 15µg of fragmented cRNA was hybridized on GeneChip Mouse Genome 430 2.0 Arrays (Affymetrix). The oligonucleotide arrays were scanned using the Affymetrix GeneChip Scanner 3000 7G and images acquired using Microarray Suite (MAS) 5.0 software. Affymetrix raw data (CEL files) were pre-processed using a robust multi-array analysis (RMA) from the Affymetrix package of Bioconductor<sup>50,51</sup>. The background corrected and normalized intensity data was then analyzed using dChip to identify differentially expressed genes using an arbitrary fold-change threshold of 1.5. The significant gene lists from G1 and G4 data sets were fed into Ingenuity pathway analysis (Ingenuity Systems) to determine overrepresentation of canonical pathways and significance. P-values were calculated by Ingenuity and presented as  $-\log(p\text{-value})$ . A  $-\log(p\text{-value})$  of 2 or 3 equals a p value of 0.01 and 0.001 respectively. For transcriptome analysis of liver and heart tissues total RNA from 5 WT, G1 and G4 Tert or 5 WT and 5 G2 Tert age and sex matched mice was isolated using Trizol (Invitrogen) followed

by DNase treatment and purification using the RNeasy Mini kit (Qiagen). RNA integrity was verified by means of an Agilent Technologies 2100 Bioanalyzer. In contrast to the HSC group the higher sample number for liver and heart (n=5) allowed identification of differentially expressed genes using significant analysis of microarrays (SAM) software<sup>52</sup>. The cut-off for significance was determined by tuning the  $\Delta$  parameter on the false discovery rate (median FDR=5% for liver and 8% for heart) and controlling the q-value for the gene list. Compiled data were analyzed using the Ingenuity Pathways Analysis software. D-chip based analysis of liver and heart microarray data followed by IPA yielded similar results as SAM analysis.

**Real-time PCR:** RNA was isolated from live sorted HSCs (5 pooled mice per group, repeated three times, 15 mice total) using the PicoPure RNA Isolation kit. For heart and liver RT-qPCR analysis, RNA was isolated from individual age and sex matched mice (at least 5 mice per group) using Trizol in combination with the RNeasy Mini kit (Qiagen) followed by DNase treatment. cDNA synthesis was performed with the Superscript III system (Invitrogen) using oligo (dT) 20, oligo (dT) 12-18 and random primers. Real-time PCR was performed in triplicates by using QuantiFast SYBR Green (Qiagen) in combination with the Stratagene 3000 Real-Time PCR Detection System. Primer sequences are listed in Supp. Table 6. For heart and liver, two different primer pairs for each gene were used. Relative mRNA expression was normalized to TATA box binding protein (TBP) and  $\beta$ -Actin mRNA expression using the  $\Delta\Delta$ CT method.

**Electron microscopy and qPCR based determination of mtDNA copy number:**

For electron microscopy analysis, fresh liver and heart tissues from 3 WT, G1 and G4 mice were fixed (2% formaldehyde /2.5% glutaraldehyde in 0.1M Sodium cacodylate buffer, pH 7.4) at 4°C overnight. Tissues were then processed at the Harvard Medical School EM Facility and visualized on a JEOL 1200EX electron microscope. 10 randomly taken longitudinal sections of heart and liver at 4800x magnification were used for quantification of mitochondrial density. Mitochondrial volume density was calculated from 10 sections per mouse using the point counting method by two independent investigators, one of them blinded according to Weibel *et al*<sup>65</sup>. For each section, average volume density was calculated independently by two investigators and the mean of both values was used to estimate the volume density for each individual tissue and mouse. Mitochondrial DNA (mtDNA) copy number was quantified by qPCR from isolated total DNA derived from HSCs, liver and heart tissues using previously described primer pairs for genomic and mitochondrial loci<sup>53</sup>. In short, for HSCs, 40000 FACS sorted HSC cells from 5 pooled WT, G1 and G4 mice were lysed in cell lysis buffer (Cells-to-cDNA II, Ambion) at 95° C for 10 minutes in a 40  $\mu$ l total volume and 4  $\mu$ l was used for qPCR analysis. Results were confirmed using isolated DNA (Qiagen DNAeasy) from HSC cells<sup>54</sup>. For heart and liver, 50 ng of total heart and liver DNA was used in each qPCR reaction. All samples were



measured in triplicates and qPCR results obtained were confirmed by three independent experiments. Two different primer pairs were used to quantify and confirm relative mtDNA copy number: COXI and Cytochrome b (mitochondrial) and  $\beta$ -Globin/H-19 for genomic DNA. All sequences are listed in Supp. Table 6. Data obtained by qPCR were analyzed by the  $\Delta\Delta$  CT method.

### **Mitochondrial isolation:**

Liver mitochondria were isolated from 10-16 week old male mice as described previously<sup>61</sup>. Briefly, livers were rapidly homogenized in ice-cold isolation buffer (250 mM mannitol, 75 mM sucrose, 100  $\mu$ M K-EDTA, 10 mM K-HEPES, pH 7.4) supplemented with 500  $\mu$ M K-EGTA (pH 7.4). Homogenates were centrifuged at 1000  $\times$  g for 10 min. Supernatants were removed and centrifuged at 10,000  $\times$  g for 15 min. Pellets were washed three times in isolation buffer supplemented with 0.5% fatty acid-free bovine serum albumin (Sigma A-6003). The first wash buffer was also supplemented with 500 $\mu$ M EGTA. The final mitochondrial pellet was resuspended in buffer without EGTA or bovine serum albumin and used for complex activity assays (see above) and for respiration studies.

Heart mitochondria were essentially isolated as previously described with minor modifications<sup>62</sup>. All steps were performed at 4<sup>0</sup>C. Briefly, tissues were rinsed in a buffer containing 100 mM KCl, 5 mM MgCl<sub>2</sub>, 5 mM EGTA and 5 mM sodium pyrophosphate at pH 7.4, and thereafter homogenized by in 2 ml of HES buffer (HEPES 5 mM, EDTA 1 mM, Sucrose 0.25M, pH 7.4 adjusted with KOH 1M) using a glass dounce homogenizer (20 strokes with loose pestle, 20 strokes tight pestle). The homogenate was centrifuged at 500  $\times$  g for 10 minutes at 4 °C (pellet discarded and supernatant re-centrifuged at 500  $\times$  g). The supernatant was centrifuged at 9000  $\times$  g for 15 minutes at 4 °C and the mitochondrial pellet was resuspended in 100-200  $\mu$ l of HES buffer with 0.2% of BSA fatty acid-free. Protein was quantified using BCA (Pierce) and the value of HES-BSA buffer alone was subtracted.

### **Mitochondrial oxygen consumption measurements:**

Mitochondrial oxygen consumption measurements using the XF24 Seahorse instrument were performed as described in detail below. Clarke electrode based respiration studies were performed at 30°C using 500  $\mu$ g of mitochondrial preparation in 500  $\mu$ L of respiration buffer. State 2 respiration was initiated by adding substrate — 5 mM glutamate and 5 mM malate. State 3 respiration was measured by the addition of ADP to final concentration of 2.5 mM. State 4 respiration was measured following ADP consumption. Respiration due to proton leak was determined using 0.5  $\mu$ M oligomycin. This was subtracted from non-mitochondrial respiration using 20  $\mu$ M myxothiazol.

**Complex I activity:** Complex I activity was measured in whole tissue or isolated mitochondrial lysates following established protocols<sup>56, 57</sup>.

**Complex IV activity:** We determined complex IV activity as described previously<sup>58</sup>.

***ATP production rates in isolated heart mitochondria:*** ATP synthesis rates in isolated heart mitochondria were determined using the luciferin/luciferase based ATP Bioluminescence Assay Kit CLS II (Roche) essentially as described<sup>59</sup>. In short, 5-10  $\mu\text{g}$  of heart mitochondria were dissolved in 50  $\mu\text{l}$  buffer A (125 KCL, 10mM Hepes, 5 mM  $\text{MgCl}_2$  and 2 mM  $\text{K}_2\text{HPO}_4$ , pH7.44) to determine complex I (pyruvate/ malate, 5mM final) or complex II (succinate, 5 mM final) driven ATP synthesis. Following standard practice, succinate driven ATP generation was measured in the presence of complex I inhibitor rotenone (0.5 $\mu\text{M}$ ) to avoid the reverse electron transfer effect<sup>15</sup>. Measurements with substrates were repeated in the presence of inhibitors of respiratory complex (rotenone (CI), oligomycin (C IV), antimycin A (CIII), 0.5 $\mu\text{M}$ ) to determine the rates of non-mitochondrial ATP production. The background of the assay was determined with mitochondria alone. The measurements for all samples were started simultaneously by adding 50  $\mu\text{l}$  of luciferin/luciferase buffer containing 1mM ADP (0.5mM final). The initial slope of the increase in ATP-supported luciferase chemiluminescence was used to determine the rate of ATP production after subtraction of the background and non-mitochondrial values. Using an ATP standard provided in the kit, the slopes were converted in nmoles/min/mg protein.

***ATP content:*** Liver and beating hearts from age and sex matched mice were quickly snap frozen for ATP determination by HPLC in a specialized NIH funded metabolic core (n= 5 for each group).

***Echocardiography:*** Five age and sex matched WT, G1 and G4 mice were examined at different ages (three months, 6 months and 15 months). Murine transthoracic echocardiography was conducted in conscious mice using a Vevo 770 high-resolution microultrasound system (VisualSonics, Toronto, ON) as previously described<sup>63</sup>. Briefly, the heart was imaged in a 2-dimensional parasternal short-axis view with M-mode echocardiogram of the midventricle recorded at the level of the papillary muscle. Heart rate, posterior wall thickness, end-diastolic and end-systolic dimensions of the left ventricle was measured from the M-mode image. Left ventricle (LV) fractional shortening was calculated (as defined by end-diastolic dimension minus the end-systolic dimension normalized for the end-diastolic dimension) and was used as an index of cardiac contraction.

***Doxorubicin induced cardiomyopathy:*** To induce cardiomyopathy Doxorubicin was used as previously described except that a lower dosage of 7.5 mg/kg body weight was used<sup>64, 65</sup>. 8 week old male mice were injected intraperitoneal with 7.5 mg/kg Doxorubicin and analyzed by echocardiography 7 days later (n=3-5 per group).

***Bone Marrow Transplants:*** CD45.1 positive recipient mice (purchased from Jackson or Taconic Laboratories, age and sex matched to donors) were irradiated with a total of 10.5 Gy  $\gamma$ -radiation (5 Gy and 5.5 Gy 3 hours apart) on the day of transplantation. Bone marrow (BM) transplants were performed using

donor nucleated bone marrow cells obtained from the long bones of WT, G1 or G4 *mTert* (all CD45.2+) donor mice. Competitive blood repopulation was performed by mixing the specified CD45.2 cells together with nucleated bone marrow cells prepared from congenic CD45.1 mice. For whole BM competitive assays, each CD45.1 recipient received  $1 \times 10^6$  CD45.2 donor cells mixed with  $1 \times 10^6$  CD45.1 competitor cells (n= 8 donors per genotype, with 3 recipients per individual donor; total recipient number per group = 24). For competitive transplants each recipient received 1500 purified HSC derived from WT, G1 or G4 *mTert* mice together with  $3 \times 10^5$  CD45.1 competitor bone marrow cells. Donor derived peripheral blood reconstitution (i.e. chimerism) was assessed for 4 months following transplantation by FACS analysis of nucleated peripheral blood cells stained with anti-CD45.1 and anti-CD45.2-specific antibodies. Blood chimerism for each recipient was calculated as the percentage of all CD45+ cells that were CD45.2+/CD45.1

**Glucose measurement in vivo and in vitro:** Peripheral glucose concentrations were determined in 12 week old male mice (10 per WT, G1 and G4 groups) through tail vein bleeds during ad libitum feeding following a 16 h starvation period using an Ascensia Elite XL glucometer (Bayer). Aliquots of adenoviruses expressing either GFP or PGC-1 $\alpha$  have been described<sup>66</sup> and were kindly provided by Bruce Spiegelman, expanded and titered at Welgen Corp. Worcester, MA. Mouse *Tert* cDNA was cloned into adenovirus vector and expanded and titered at Welgen Corp. Worcester, MA. For virus injections, a total of  $1 \times 10^9$  plaque-forming units per recombinant virus was administered by tail vein injection. Per group 8 mice (sex, age, and weight matched) were injected. 5 days post infection, glucose levels were determined before and after starvation (16 h). Hepatocyte cultures and determination of glucose levels in the supernatant of cultured hepatocytes (n= 5 per group) was performed according to published protocols<sup>66</sup>. In short, primary hepatocytes from different groups were cultured in six-well plates at a concentration of  $1 \times 10^6$  in 10% FCS containing DMEM. In the overexpression studies, cells were infected with Ad-GFP, Ad-Tert or Ad-PGC respectively (MOI 30). 48 hrs post-infection medium was changed to glucose free DMEM containing sodium lactate (20mM) and sodium pyruvate (2mM). 3 hours later glucose production was determined in the supernatant (normalized to protein content).

**Mouse embryonic fibroblast studies:** Mouse embryonic fibroblasts (MEFs) were generated using standard techniques from WT, *p53*<sup>-/-</sup>, G2 and G2 *p53*<sup>-/-</sup> embryos. Cells used in these experiments were from passages 3-5. For p53 activation, 90% confluent cells were either treated with ETOH vehicle or 4-OHT dissolved in 70% ETOH at a final concentration of 200 nM for 48 hours. Mitochondrial mass was determined by staining live cells with 25nM MitoGreen (Invitrogen) for 30min in HBSS or by qPCR using primers for Cyt B and  $\beta$ -Globin.

**Reporter assays:** Promoter sequences for PGC1 $\alpha$  and PGC1 $\beta$  were cloned into the pGL4 (Promega, Madison WI) luciferase reporter vector. Sequences of

lengths 2.8 kb (PGC-1 $\alpha$ ) and 2.6 kb (PGC-1 $\beta$ ) upstream of the start sites of PGC1 $\alpha$  and PGC1 $\beta$  respectively were amplified by PCR from genomic mouse heart DNA. Upstream lengths were chosen based on putative p53 binding sites identified by TRANSFAC<sup>67</sup>. PCR was performed using Phusion High-Fidelity DNA Polymerase (Finnzymes) with the following primers PGC1 $\alpha$ :

Forward: 5' TGGGGAGACAGAAAATCCA3' and Reverse: 5'CCAGCCCCTTACTGAGAGTG 3'. PGC1 $\beta$ : Forward 5' CATTAAAGCACGGA ACTTTTACCTT 3' and Reverse 5' GATAGTTGAGGAAGAAGGACGAGA 3'. All cloned sequences were sequence verified. The PG13-luc plasmid containing 13 copies of a synthetic p53 DNA binding site and MG15-luc containing 15 copies of a *mutated* p53 DNA binding site were used as positive and negative controls during the transfection assays and have been extensively described<sup>68,69</sup>.

A  $\beta$ -galactosidase expressing plasmid was used to normalize transfection efficiency. G2 p53<sup>+/+</sup>, G2 p53<sup>-/-</sup> MEFs were transiently transfected (Lipofectamine 2000, Invitrogen) with either empty PGL4, PGL4-PGC1 $\alpha$ /PGC-1 $\beta$ , PG-13 (positive control), MG15 (negative control) vectors and assessed along with  $\beta$ -Galactosidase and p53 transcriptional activity using the luciferase reporter assay and  $\beta$ -Galactosidase Assay System (Promega).

For p53 over-expression studies, G2 p53<sup>-/-</sup> were transfected with pCDNA-p53 and the above luciferase constructs and  $\beta$ -galactosidase to normalize transfection efficiency and p53 transcriptional activity measured in each luciferase assay. Experiments measuring either endogenous p53 activity or exogenous p53 were done in triplicate wells and repeated three times.

**Chromatin IP:** For chromatin IP we followed the protocol provided with the EZ ChIP kit from Upstate Biotechnology. In short, cells from 4 15 cm plates were fixed, lysed and sheared (3 x 10 sec, idle time 45 sec). For overnight immunoprecipitations 5  $\mu$ g of a rabbit p53 antibody (FL393, Santa Cruz, sc-6243) and an equal amount control rabbit IgG (sc 2027, Santa Cruz) was used. After extensive washing, the immunoprecipitants were eluted with 2% SDS in 0.1 M NaH<sub>2</sub>CO<sub>3</sub>. Cross-linking was reversed by heating overnight at 65<sup>o</sup> C and samples were treated with proteinase K for 1 h at 45<sup>o</sup> C. Input DNA and immunoprecipitated DNA were purified using the PCR purification kit (Qiagen) and analyzed. QPCR was used to quantify the promoter binding with 30 cycles total (95<sup>o</sup> C, 30 sec, 55<sup>o</sup> C, 30 sec, 72<sup>o</sup> C 1 min). PCR products were subsequently separated in 2% agarose gel to visualize and results are expressed as fold enrichment.

For adenoviral delivery of p53, Ad-p53 was commercially purchased (Vector Biolabs # 1260) and p53<sup>-/-</sup> and G2 p53<sup>-/-</sup> MEFs were infected at 0.10 and 80 MOI. Cells were harvested 36 hours after infection and processed for either RNA or ChIP analysis. DO-1 p53 antibody was used for the p53 ChIP after adenoviral infection. ChIP was analyzed by qPCR with and results are presented as percent input following the formula  $100 \times 2^{(\text{Adjusted input} - \text{Ct (IP)})}$ . Primer sequences used in the ChIP assays are provided in Supplemental Table 6.

**Apoptosis Assays:**

Tunel staining was performed on heart and liver section using a commercial kit (ApopTag® Peroxidase In Situ Apoptosis Detection Kit, S7100, Milipore) following the manufacture's instructions. Cleaved caspase 3 western blotting was performed with an antibody against cleaved caspase 3 (AP1027, EMD)

**Western blotting:** Liver tissue was homogenized in lysis buffer (50 mM Tris (pH 7.4), 150 mM NaCl, 1% NP-40, 50 mM NaF, 1 mM dithiothreitol, 2 mg ml<sup>-1</sup> pepstatin A) including complete inhibitor cocktail (Roche) and phosphatase inhibitor (cocktails I and II, Sigma). 80 µg of lysat was electrophoresed and transferred to nitrocellulose membranes. Blots were blocked with 5% non-fat dry milk, and incubated overnight at 4 °C with anti-PGC-1α (EMD Biosciences, ST1202, 1:250), ERRα (Novus Biologicals, EPR46Y, 1:250), NRF-1 (Rockland, 200-401-869, 1:250), Tfam (Santa Cruz, 1:250, sc-23588) and anti-ATPsynthase, anti-p53 rabbit polyclonal (FL939, Santa Cruz), anti-p21 (sc-397, Santa Cruz), anti-MDM2 (#556353, Pharmingen), 1/10,000 anti-vinculin (Sigma) antibodies respectively, washed and incubated with secondary antibodies (1/10000 goat anti-rabbit-HRP/anti-mouse -HRP, Pierce) and developed with the Femto chemiluminescent reagent (Pierce).

**ROS assays:** RT-qPCR analysis of ROS defense genes on cDNA derived from HSC, liver or heart was performed as described in Material and Methods using published primer sequences (St-Pierre et al, Cell, 2006 Oct 20;127(2):397-408). For determination of ROS levels by FACS HSC were isolated from 3 WT and 3 G4 12 week old male mice and ROS levels were determined after staining in 5 µM CM-H<sub>2</sub>DFCDA (Invitrogen) for 30 minutes at 37 °C (n=3). For determination of carbonylated proteins by western blot we used the Milipore OxyBlot Protein Detection kit S7150 with 20µg total liver protein loaded per group as directed by the manufacturer. Mitochondrial H<sub>2</sub>O<sub>2</sub> production was measured using the Amplex Red-Horseradish peroxidase method (Invitrogen) as described previously<sup>70</sup>. This assay is based on the Horseradish peroxidase (2 units/ml) H<sub>2</sub>O<sub>2</sub>-dependent oxidation of nonfluorescent Amplex Red (80 µM) to fluorescent resorufin red. In short, 30 µg mitochondria were diluted in 50 µl reaction buffer (125 mM KCl, 10 mM HEPES, 5 mM MgCl<sub>2</sub>, 2 mM K<sub>2</sub>HPO<sub>4</sub>, pH 7.44) to determine complex I (pyruvate /malate, 5 mM) or complex II (succinate, 5 mM) driven H<sub>2</sub>O<sub>2</sub> production with and without inhibitors (rotenone, antimycin A, 0.5µM). Mitochondrial H<sub>2</sub>O<sub>2</sub> production was measured after the addition of 50 µl of reaction buffer containing horseradish peroxidase and Amplex Red. Fluorescence was followed at an excitation wavelength of 545 nm and an emission wavelength of 590 nm for 5 minutes. The slope of the increase in fluorescence is converted to the rate of H<sub>2</sub>O<sub>2</sub> production with a standard curve. All of the assays were performed at 25 °C. The results are reported as pmoles/min/mg protein.

**Telomere length measurement by Q-FISH-LSC** For quantification of telomere length in either isolated, cytospun HSC cells or liver and heart tissues the the

iCys Research Imaging Cytometer (Compucyte) was performed as described early (Wu et al., *Telomere dysfunction: a potential cancer predisposition factor*. *J Natl Cancer Inst*. 2003 Aug 20;95(16):1211-8) with few following modifications. Cellular spreads were prepared by using a standard cytogenetic method: cell suspension in methanol – acetic acid (1:1) was dropped onto uncoated microscope slides (Fisher Sci.) and air-dried. Press-to-Seal silicone isolators (Invitrogen) allowed applying up to twenty four independent cell samples to the same slide in order to minimize sample-to-sample variations of the experimental conditions. FFPE tissue sections, about 5 mm thick, were deparaffinized and treated with proteinase K under the selected conditions in order to make chromosomal DNA accessible for hybridization. Tissue slides or cell spreads were denatured in 70% formamide 70°C for 3 minutes. PNA probe FITC-00-T2AG3 was hybridized under the following conditions: 70% formamide, 0.06x SSC, 0.2% BSA, 0.5 ng/μL tRNA, 0.5 ng/μL PNA probe; 3 hours at 25°C. To achieve very uniform telomere-tissue-FISH we used MAUI Mixer (BioMicro) with 40μL chamber. To collect the population data on telomere length, the iCys LSC was customized with the 633 nm HeNe red laser replaced by a 532 nm green diode laser (405 - 488 - 532), added 60X dry objective, and increased spatial resolution from 0.5 to 0.1 μm size of stage steps. To avoid any possible drawbacks of “different day experiments”, we carried out only relative quantification: a cross-comparison of samples using a multiple samples - single slide setup. DAPI-normalized background corrected telomere fluorescence has been used for the quantification (Meeker et al. *Telomere length assessment in human archival tissues: combined telomere fluorescence in situ hybridization and immunostaining*. *Am J Pathol*. 2002 Apr;160(4):1259-68). The target number for each sample was approximately 1500 cells quantified.

**Telomere dysfunction induced foci (TIF):** Frozen liver sections were fixed in 2% PFA for 15 minutes. 53BP1 immunostaining was done using a rabbit anti-53BP1 antibody (Bethyl, IHC 0001), followed by an anti-rabbit biotinylated secondary antibody (Vector Laboratories) and FITC conjugated Streptavidin (Invitrogen). Subsequently telomere FISH was performed using denaturation at 83°C for 3 minutes and hybridization with a Cy3-labeled PNA telomeric probe (Applied Biosystems) in 70% formamide at room temperature for 2 hours. Slides were mounted in Vectashield medium with DAPI. 500 nuclei were analyzed using filter sets and software developed by Applied Spectral Imaging. Liver sections from gamma-irradiated mice were used as positive control for the validity of the 53BP1 signal.

**Statistics:** If not otherwise indicated student t-test was used to calculate statistical differences among groups and error bars present s.e.m.

## **Detailed protocol for Respirometry of isolated mitochondria**

For a more detailed protocol and for updates in the protocol visit [www.shirihai-lab.org](http://www.shirihai-lab.org). This protocol has been established thanks to important contributions of Drs. Alvaro Elorza, Dr. George Rogers, Dr. Martin Brand, Dr. David Ferrick, Dr. David Nicholls and Dr. Anne N. Murphy.

**1. Mitochondrial isolation.** Hearts were incubated and minced in ice-cold fiber relaxation buffer (during approximately 10 minutes; KCl 100 mM, EGTA 5 mM, HEPES 5 mM adjusted with KOH to pH 7.0; in order to facilitate the release of intermyofibrillar mitochondria) and they were homogenized in 2 ml of HES buffer (HEPES 5 mM, EDTA 1 mM, Sucrose 0.25M, pH 7.4 adjusted with KOH 1M) using a glass dounce homogenizer (20 strokes with loose pestle, 20 strokes tight pestle). The homogenate was centrifuged at 500xg for 10 minutes at 4 °C (pellet discarded and supernatant re-centrifuged at 500xg). The supernatant was centrifuged at 9000xg for 15 minutes at 4 °C and the crude mitochondrial pellet was re-suspended in 100-200 µl of HES buffer with 0.2% of BSA FFA-free (an additional centrifugation step for washing the pellet can be performed). Protein was quantified using BCA (Pierce) and the value of protein measured in HES-BSA 0.2% buffer alone was subtracted.

Livers were homogenized after washing the blood with PBS and using a Potter-Elvehjem (teflon-glass) homogenizer instead, performing 15 strokes in ice-cold isolation buffer (250 mM mannitol, 75 mM sucrose, 100 µM K-EDTA, 10 mM K-HEPES, pH 7.4) supplemented with 500 µM K-EGTA (pH 7.4). Homogenates were centrifuged at 1000xg for 10 min. Supernatants were removed and centrifuged at 10,000 × g for 15 min. Pellets were washed three times in isolation buffer supplemented with 0.5% fatty acid-free bovine serum albumin (Sigma A-6003). The first wash buffer was also supplemented with 500 µM EGTA. The final mitochondrial pellet was re-suspended in HES buffer with 0.2% of BSA FFA-free for respiration (and without BSA for complexes activity). This isolation protocol was developed by Kristal, B. S. & Brown, A. M. J Biol Chem 274, 23169-75 (1999).

## **2. Mitochondrial oxygen consumption measurements using XF24.**

### **2.1 V7 Plate loading**

The amount of mitochondria was titrated, as the absolute amount of protein loaded is highly dependent on the mitochondrial isolation protocol and the loading methodology used. In the present manuscript, isolated mitochondria (30-40 µg in HES-BSA 0.2% buffer per well, n=3-4 replicates per mouse) were loaded in the center of the well (using 5-10 µl, low volume that facilitates the

contact and adhesion of mitochondria to the bottom of the well) of a V7 plate on ice and 440-445  $\mu\text{l}$  of ice cold **Mitochondrial Assay Solution (MAS)**: Sucrose 70 mM, Mannitol 220 mM,  $\text{KH}_2\text{PO}_4$  5 mM,  $\text{MgCl}_2$  5 mM, HEPES 2 mM, EGTA 1 mM, BSA fatty acid-free 0.2 %, pH 7.4 adjusted with KOH 1 M) + 50  $\mu\text{l}$  of MAS buffer with 10X substrates (complex II driven respiration: succinate 50 mM + rotenone 20  $\mu\text{M}$ ; complex I : pyruvate + malate, 50 mM or glutamate + malate 50 mM) were added on top. Alternatively, the mitochondrial suspension can be diluted in MAS at a certain concentration and load 50  $\mu\text{l}$  in the V7 plate. After loading, centrifugation of the V7 plate during 20 minutes at 2000xg (4°C) is performed to attach the mitochondria at the bottom of the plate. After centrifugation, 400  $\mu\text{l}$  of MAS + substrates 1X (ice cold, 5mM each, 2  $\mu\text{M}$  rotenone for complex II) is added on top. With this centrifugation step, it is possible to reduce the amount of mitochondria to 5  $\mu\text{g}$ . This step was not used in the present manuscript, but was successfully developed by Dr. George Rogers, Dr. Alvaro Elorza and Dr. Anne N. Murphy (personal communication). The loaded V7 plate was incubated for 5-9 minutes at 37°C (no  $\text{CO}_2$  incubator) before loading it into the XF24. Mitochondria attachment to the bottom of the plate can be observed using a microscope (20x) before and after the measurements. The initial consumption rate of oxygen measured before the first injection (port A) is state II (no ADP present, only respiration due to proton leak and contaminant ADP, also known as pseudo-state IV; see below).

**Scheme plate loading:**

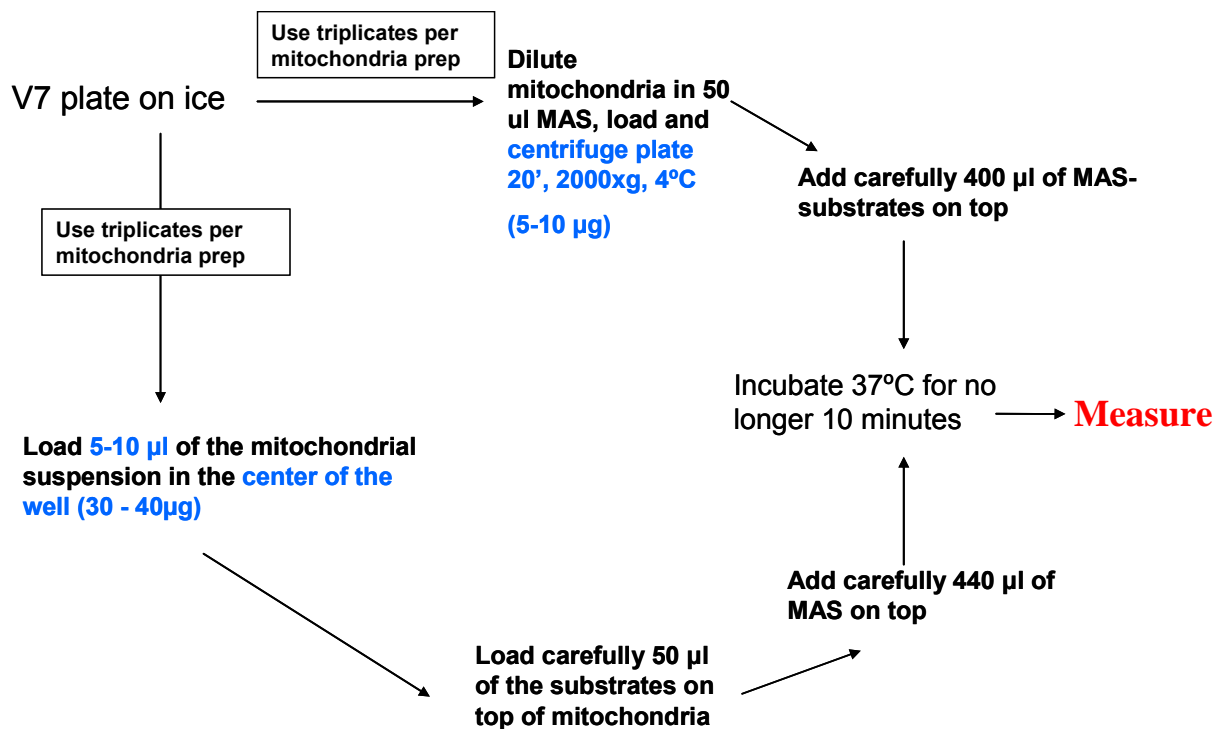



## 2.2 Loading the cartridge

The dilutions of ADP and the different mitochondrial chemicals are freshly prepared the day of the experiment from concentrated stocks. The four sequential injection ports of the Seahorse cartridge contained (in MAS solution and adjusted to pH 7.4): **A** (first port injected): 50  $\mu$ l 10X substrate and ADP 2.5 mM; **B**: 55  $\mu$ l Oligomycin 20  $\mu$ M (ATP synthase inhibitor); **C**: 60  $\mu$ l 2,4-dinitrophenol (DNP; uncoupler) 1 mM; **D**: 65  $\mu$ l Antimycin A 40  $\mu$ M (complex III inhibitor). Therefore the final concentrations are ADP 250  $\mu$ M, Oligomycin 2  $\mu$ M, DNP 100  $\mu$ M and Antimycin 4  $\mu$ M. Oxygen consumption rates (pmols oxygen per minute) were monitored in real time after the injection. State III was determined after port **A** injection, State IV after port **B** and uncoupled respiration rates after port **C**. Antimycin A was used as a control (port **D**), as it blocks mitochondrial oxygen consumption linked to the electron transport chain. The ratio between state III and state IV is used as a control for the quality of the mitochondrial preparation and it is known as RCR (respiratory control ratio).

## 2.3 Measurement protocol (performed at 37 °C)

Calibration of the cartridge: 29 min

Load V7 plate.

- 1) Equilibration (12 min; 3 cycles of 2 min Mix, 2 min Wait).
- 2) State II (8 min 50 sec; 2 cycles of 25 sec Mix, 4 min Measure).
- 3) Injection port A.
- 4) State III (4 min 30-60 sec; 1 cycle of 25 sec Mix, 4 min Measure, 30-60 sec Mix\*).
- 5) Injection port B.
- 6) State IV (4 min 30-60 sec; 1 cycle of 25 sec Mix, 4 min Measure, 30-60 sec Mix\*).
- 7) Injection port C.
- 8) Uncoupled (4 min 30-60 sec; 1 cycle of 25 sec Mix, 4 min Measure, 30-60 sec Mix\*).
- 9) Injection port D.
- 10) Antimycin A (4 min 30-60 sec; 1 cycle of 25 sec Mix, 4 min Measure).

\* Adjust the time to restore oxygen concentration in the well.

### 3. Representative OCR tracings.

For state III and DNP (uncoupled respiration), the higher average value of OCR (oxygen consumption rates, pmols oxygen consumed per minute, calculated using the AKOS algorithm) for each mouse was selected. For state IV and antimycin A, the lower OCR values were selected. The values selected in this particular trace are pointed with the arrows. In this representative tracing, we show isolated mitochondria from heart (30  $\mu$ g protein/well, n=4 replicates  $\pm$  SEM) under 5 mM pyruvate and malate and a state III/state IV or RCR > 4 (6.78), showing that it is a good quality mitochondrial preparation, together with the inhibition with antimycin A. Increase of respiration with the uncoupler (port C) must be close to state III or higher.

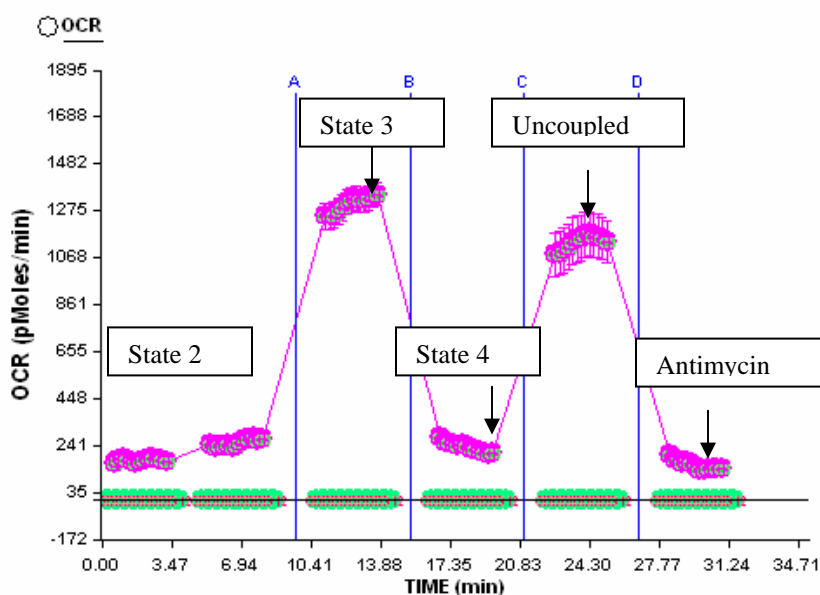

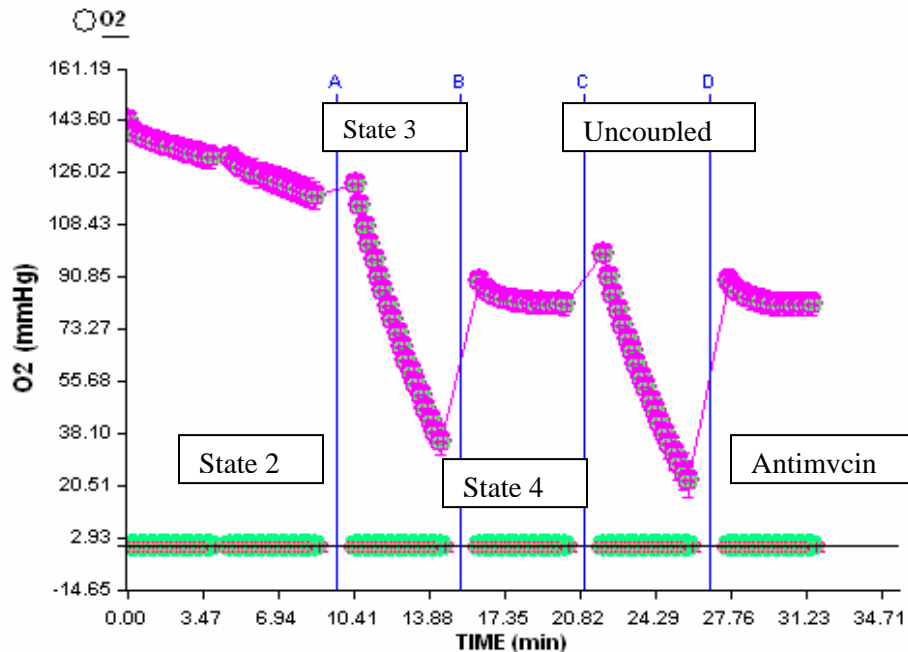

### **References:**

- 46 Farazi, P. A. et al. Differential impact of telomere dysfunction on initiation and progression of hepatocellular carcinoma. *Cancer Res* 63, 5021-7 (2003).
- 47 Chin, L. et al. p53 deficiency rescues the adverse effects of telomere loss and cooperates with telomere dysfunction to accelerate carcinogenesis. *Cell* 97, 527-38 (1999).
- 48 Maser, R. S. et al. Chromosomally unstable mouse tumours have genomic alterations similar to diverse human cancers. *Nature* 447, 966-71 (2007).
- 49 Ema, H. et al. Adult mouse hematopoietic stem cells: purification and single-cell assays. *Nat Protoc* 1, 2979-87 (2006).
50. Irizarry, R. A. et al. Exploration, normalization, and summaries of high density oligonucleotide array probe level data. *Biostatistics* 4, 249-64 (2003).
51. Gentleman, R. C. et al. Bioconductor: open software development for computational biology and bioinformatics. *Genome Biol* 5, R80 (2004).
52. Tusher, V. G., Tibshirani, R. & Chu, G. Significance analysis of microarrays applied to the ionizing radiation response. *Proc Natl Acad Sci U S A* 98, 5116-21 (2001).

53. Hayashi, M. et al. A crucial role of mitochondrial Hsp40 in preventing dilated cardiomyopathy. *Nat Med* 12, 128-32 (2006).
54. Sankaran, V. G., Orkin, S. H. & Walkley, C. R. Rb intrinsically promotes erythropoiesis by coupling cell cycle exit with mitochondrial biogenesis. *Genes Dev* 22, 463-75 (2008).
55. Weibel. *Stereological Methods* (Academic, London, 1979.).
56. de Wit , L. *Reliable Assay for Measuring Complex I activity* (Elsevier, 2009).
57. *Current protocols in Toxicology* (John Wiley & Sons, Inc., November 2008).
58. Trounce, I. a. *Assessment of Mitochondrial Oxidative Phosphorylation in Patient Muscle Biopsies, Lymphoblasts, and Transmitted Cell Lines* (Academic Press, 1996).
59. Mansouri, A. et al. Alterations in mitochondrial function, hydrogen peroxide release and oxidative damage in mouse hind-limb skeletal muscle during aging. *Mech Ageing Dev* 127, 298-306 (2006).
60. Wilson, V. *Mitochondria, a practical approach* ( IRL Press, Oxford ; Washington, DC ; , ©, 1987).
61. Kristal, B. S. & Brown, A. M. Apoptogenic ganglioside GD3 directly induces the mitochondrial permeability transition. *J Biol Chem* 274, 23169-75 (1999).
62. Elrod, J. W. et al. Hydrogen sulfide attenuates myocardial ischemia-reperfusion injury by preservation of mitochondrial function. *Proc Natl Acad Sci U S A* 104, 15560-5 (2007).
63. Minamishima, Y. A. et al. Somatic inactivation of the PHD2 prolyl hydroxylase causes polycythemia and congestive heart failure. *Blood* 111, 3236-44 (2008).
64. Shizukuda, Y., Matoba, S., Mian, O. Y., Nguyen, T. & Hwang, P. M. Targeted disruption of p53 attenuates doxorubicin-induced cardiac toxicity in mice. *Mol Cell Biochem* 273, 25-32 (2005).
65. Fan, G. C. et al. Heat shock protein 20 interacting with phosphorylated Akt reduces doxorubicin-triggered oxidative stress and cardiotoxicity. *Circ Res* 103, 1270-9 (2008).
66. Yoon, J. C. et al. Control of hepatic gluconeogenesis through the transcriptional coactivator PGC-1. *Nature* 413, 131-8 (2001).
67. Wingender, E., Dietze, P., Karas, H. & Knuppel, R. TRANSFAC: a database on transcription factors and their DNA binding sites. *Nucleic Acids Res* 24, 238-41 (1996).
68. Jackson, M. W., Lindstrom, M. S. & Berberich, S. J. MdmX binding to ARF affects Mdm2 protein stability and p53 transactivation. *J Biol Chem* 276, 25336-41 (2001).
69. Kern, S. E. et al. Identification of p53 as a sequence-specific DNA-binding protein. *Science* 252, 1708-11 (1991).
70. Muller, F. L. et al. High rates of superoxide production in skeletal-muscle mitochondria respiring on both complex I- and complex II-linked substrates. *Biochem J* 409, 491-9 (2008)

## Supplemental table 1

### HSC downregulated 260 probe sets

#### Entrez Gene Name

melanoma antigen family D, 2  
heterogeneous nuclear ribonucleoprotein U (scaffold attachment factor A)  
ATPase, H<sup>+</sup> transporting, lysosomal accessory protein 2  
placenta-specific 8  
S100 calcium binding protein A8  
lymphocyte antigen 6 complex, locus C1  
centrosomal protein 76kDa  
proteinase 3  
proliferating cell nuclear antigen  
chromosome 16 open reading frame 13  
chromosome 4 open reading frame 27  
LIM domain containing preferred translocation partner in lipoma  
predicted gene 4076  
immunoglobulin kappa chain complex  
neutrophilic granule protein  
splicing factor, arginine/serine-rich 6  
immunoglobulin heavy constant mu  
predicted gene 10883  
tumor protein p53 binding protein 1  
immunoglobulin kappa chain complex  
cytochrome c, somatic  
ARP3 actin-related protein 3 homolog (yeast)  
LATS, large tumor suppressor, homolog 2 (Drosophila)  
poly(A) binding protein, cytoplasmic 1  
CDC28 protein kinase regulatory subunit 1B  
serglycin  
glutaminyl-tRNA synthetase  
phosphoinositide-3-kinase interacting protein 1  
solute carrier family 25 (mitochondrial carrier; adenine nucleotide translocator), member 6  
transmembrane emp24 domain trafficking protein 2  
mast cell protease 9  
citrate synthase  
cytochrome c oxidase subunit Vib polypeptide 1 (ubiquitous)  
DEK oncogene  
transmembrane emp24 protein transport domain containing 9  
succinate dehydrogenase complex, subunit B, iron sulfur (lp)  
nucleoporin 62kDa  
chromosome 20 open reading frame 24  
SMT3 suppressor of mif two 3 homolog 2 (yeast)  
granulin  
ATP synthase, H<sup>+</sup> transporting, mitochondrial F0 complex, subunit C3 (subunit 9)  
malate dehydrogenase 1, NAD (soluble)  
TAF9 RNA polymerase II, TATA box binding protein (TBP)-associated factor, 32kDa  
DNA (cytosine-5-)-methyltransferase 3 beta  
ubiquitin B  
ataxin 10  
granulin

phosphoglycerate kinase 1  
myosin, light chain 9, regulatory  
ubiquinol-cytochrome c reductase binding protein  
guanine nucleotide binding protein (G protein), gamma 5  
H2A histone family, member Z  
phosphoglycerate kinase 1  
cytochrome c oxidase subunit Va  
heat shock protein 90kDa alpha (cytosolic), class A member 1  
H3 histone, family 3C  
ubiquitin B  
proliferation-associated 2G4, 38kDa  
cytochrome c oxidase subunit Va  
transmembrane BAX inhibitor motif containing 6  
CGG triplet repeat binding protein 1  
phosphoglycerate kinase 1  
heat shock 60kDa protein 1 (chaperonin)  
tyrosine 3-monooxygenase/tryptophan 5-monooxygenase activation protein, zeta polypeptide  
nucleophosmin 1  
anoctamin 8  
immunoglobulin kappa chain complex  
CD93 molecule  
proteasome (prosome, macropain) subunit, alpha type, 6  
ubiquitin B  
trinucleotide repeat containing 6A  
guanine nucleotide binding protein (G protein), gamma 5  
Sec61 alpha 1 subunit (*S. cerevisiae*)  
family with sequence similarity 120A  
ribosomal protein L15 pseudogene 3  
NADH dehydrogenase (ubiquinone) 1, subcomplex unknown, 2, 14.5kDa  
RAN, member RAS oncogene family  
S100 calcium binding protein A9  
myeloperoxidase  
Sec61 beta subunit  
tubulin, alpha 4a  
dihydrouridine synthase 2-like, SMM1 homolog (*S. cerevisiae*)  
glycosyltransferase 8 domain containing 2  
ferritin, heavy polypeptide 1  
heterochromatin protein 1, binding protein 3  
complement component 1, q subcomponent binding protein  
ribosomal protein S3  
beclin 1, autophagy related  
T-cell specific GTPase  
histidine triad nucleotide binding protein 1  
chaperonin containing TCP1, subunit 2 (beta)  
non-POU domain containing, octamer-binding  
PHD finger protein 5A  
interferon activated gene 203  
RIKEN cDNA 6820431F20 gene  
RAB14, member RAS oncogene family  
chaperonin containing TCP1, subunit 2 (beta)  
ribosomal protein S3A  
spindlin 1

ribosomal protein L26  
cytochrome c oxidase subunit VIa polypeptide 1  
phosphoinositide-3-kinase, catalytic, delta polypeptide  
vimentin  
eukaryotic translation initiation factor 4 gamma, 2  
ribosomal protein L4  
coagulation factor II (thrombin) receptor  
peptidylprolyl isomerase A  
transmembrane emp24 domain trafficking protein 2  
peptidylprolyl isomerase F  
ribonuclease T2  
SMT3 suppressor of mif two 3 homolog 2 (yeast)  
peptidylglycine alpha-amidating monooxygenase  
ribosomal protein L7A  
tubulin, alpha 1b  
H2A histone family, member Z  
H2A histone family, member Z  
similar to hCG1795014  
ribosomal protein S7  
malate dehydrogenase 2, NAD (mitochondrial)  
single-stranded DNA binding protein 1  
cyclin-dependent kinase 6  
eukaryotic translation elongation factor 1 alpha 1  
ribosomal protein L29  
ribosomal protein S26  
transmembrane emp24 domain trafficking protein 2  
translocase of outer mitochondrial membrane 20 homolog (yeast)  
thioredoxin  
calmodulin 2 (phosphorylase kinase, delta)  
cylindromatosis (turban tumor syndrome)  
ribosomal protein L7  
ribosomal protein L7  
transketolase  
heterogeneous nuclear ribonucleoprotein A2/B1  
non-POU domain containing, octamer-binding  
retinoblastoma binding protein 7  
ribosomal protein L23a  
BSD domain containing 1  
ribosomal protein L17  
death-associated protein  
ribosomal protein L29  
ribosomal protein S2  
splicing factor, arginine/serine-rich 3  
H2A histone family, member Z  
heterogeneous nuclear ribonucleoprotein D-like  
FK506 binding protein 3, 25kDa  
TSC22 domain family, member 4  
APEX nuclease (multifunctional DNA repair enzyme) 1  
ribosomal protein S2  
LIM domain only 2 (rhombotin-like 1)  
ATP synthase, H<sup>+</sup> transporting, mitochondrial F1 complex, alpha subunit 1, cardiac muscle  
ribosomal protein L10 pseudogene 16

eukaryotic translation initiation factor 3, subunit I  
hypothetical LOC729505  
serine incorporator 3  
cofilin 1 (non-muscle)  
ubiquitin C  
hyaluronan-mediated motility receptor (RHAMM)  
prolyl endopeptidase  
actin, beta  
hexokinase 1  
ribosomal protein L24  
ubiquitin C  
eukaryotic translation initiation factor 3, subunit I  
splicing factor 3b, subunit 4, 49kDa  
COX17 cytochrome c oxidase assembly homolog (*S. cerevisiae*)  
GDP dissociation inhibitor 2  
hemoglobin, alpha 2  
protein tyrosine phosphatase, receptor type, S  
FBJ murine osteosarcoma viral oncogene homolog  
cathepsin G  
potassium voltage-gated channel, subfamily H (eag-related), member 3  
ATPase, H<sup>+</sup> transporting, lysosomal accessory protein 2  
erythroid differentiation regulator 1  
heat shock 70kDa protein 8  
ubiquitin A-52 residue ribosomal protein fusion product 1  
chaperonin containing TCP1, subunit 3 (gamma)  
heterogeneous nuclear ribonucleoprotein A3  
ornithine decarboxylase antizyme 1  
ribosomal protein L28  
ubiquitin A-52 residue ribosomal protein fusion product 1  
anaphase promoting complex subunit 5  
high-mobility group nucleosome binding domain 1  
ribosomal protein S6  
solute carrier family 5 (sodium/glucose cotransporter), member 9  
carbonic anhydrase VII  
serine incorporator 3  
similar to [Human Ig rearranged gamma chain mRNA, V-J-C region and complete cds.], gene product  
glucose phosphate isomerase  
ribosomal protein L17  
ribosomal protein L23a  
ribosomal protein S5  
ribosomal protein S6  
tyrosine 3-monooxygenase/tryptophan 5-monooxygenase activation protein, beta polypeptide  
ribosomal protein L23a  
ribosomal protein L6  
ribosomal protein S2  
ribosomal protein L26  
ribosomal protein S11  
ribosomal protein S18 pseudogene 5  
ribosomal protein S6  
ribosomal protein S6  
ribosomal protein S4, X-linked  
ribosomal protein L23a



ribosomal protein L19  
ribosomal protein L24  
selenoprotein P, plasma, 1  
high-mobility group nucleosome binding domain 1  
ribosomal protein S6  
family with sequence similarity 135, member A  
ribosomal protein L11  
tumor protein, translationally-controlled 1  
glia maturation factor, gamma  
SERPINE1 mRNA binding protein 1  
non-metastatic cells 2, protein (NM23B) expressed in  
ribosomal protein S28  
apoptosis inhibitor 5  
DEAD (Asp-Glu-Ala-Asp) box polypeptide 5  
RAN, member RAS oncogene family  
PRP19/PSO4 pre-mRNA processing factor 19 homolog (*S. cerevisiae*)  
ribosomal protein S28  
actin related protein 2/3 complex, subunit 2, 34kDa  
clathrin, light chain (Lca)  
ribosomal protein L5  
glutathione peroxidase 1  
ribosomal protein S18 pseudogene 5  
ribosomal protein S29  
coiled-coil-helix-coiled-coil-helix domain containing 2  
ERO1-like (*S. cerevisiae*)  
ribosomal protein L12  
ribosomal protein L31  
ribosomal protein S29  
eukaryotic translation initiation factor 3, subunit F  
ERO1-like (*S. cerevisiae*)  
guanine nucleotide binding protein (G protein), beta polypeptide 2-like 1  
ribosomal protein L10A  
ribosomal protein L35  
small nuclear ribonucleoprotein polypeptide G  
chaperonin containing TCP1, subunit 4 (delta)  
ribosomal protein L18  
ribosomal protein L35  
ribosomal protein L9  
ribosomal protein S16  
stathmin 1  
X (inactive)-specific transcript (non-protein coding)  
activating transcription factor 4 (tax-responsive enhancer element B67)  
ribosomal protein L30  
ribosomal protein L35  
ribosomal protein S28  
coiled-coil domain containing 72  
ribosomal protein L21  
heterogeneous nuclear ribonucleoprotein F  
ribosomal protein L23  
ribosomal protein L3  
ribosomal protein S16  
ribosomal protein S8

superoxide dismutase 1, soluble  
chromobox homolog 3 (HP1 gamma homolog, Drosophila)  
ribosomal protein S29  
ribosomal protein L22  
ribosomal protein L9

## HSC upregulated 20 probe sets

immunoglobulin kappa chain variable 28  
hemoglobin alpha adult chain1  
coagulation factor II (thrombin) receptor  
dihydrouridine synthase 2-like  
proliferation-associated 2G4  
transformation related protein 53 binding protein 1  
splicing factor, arginine /serine- rich6  
neutrophilic granule protein protein  
erythroid differentiation regulator 1  
S100 calcium binding protein A9  
chymase2, mast cell  
ribosomal RNA processing 15 homolog (S. cerevisiae)  
serum amyloid A4, constitutive  
scavenger receptor class A, member 5 (putative)  
syndecan 4  
serine dehydratase  
Sec61 alpha 1 subunit (S. cerevisiae)  
nudix (nucleoside diphosphate linked moiety X)-type motif 4  
paired box 8

## Supp. Table 2 TERT Liver

## Downregulated 1209 probe sets

## Entrez Gene Name

RIKEN cDNA 0610009L18 gene  
 RIKEN cDNA 0610012H03 gene  
 RIKEN cDNA 1110001A16 gene  
 RIKEN cDNA 1110006G14 gene  
 RIKEN cDNA 1110054M08 gene  
 RIKEN cDNA 1110059G02 gene  
 RIKEN cDNA 1500017E21 gene  
 RIKEN cDNA 1700012L04 gene  
 RIKEN cDNA 1700020I14 gene  
 RIKEN cDNA 1700025K04 gene  
 RIKEN cDNA 1810019D21 gene  
 RIKEN cDNA 1810058I24 gene  
 RIKEN cDNA 2010003K15 gene  
 RIKEN cDNA 2010109N14 gene  
 RIKEN cDNA 2610001J05 gene  
 RIKEN cDNA 2610024B07 gene  
 RIKEN cDNA 2810468N07 gene  
 glyceraldehyde-3-phosphate dehydrogenase pseudogene  
 RIKEN cDNA 3100002H20 gene  
 RIKEN cDNA 4930553P13 gene  
 RIKEN cDNA 4930554C24 gene  
 RIKEN cDNA 4931408D14 gene  
 RIKEN cDNA 5730407I07 gene  
 RIKEN cDNA 6720418B01 gene  
 RIKEN cDNA 9030419F21 gene  
 RIKEN cDNA 9130409I23 gene  
 RIKEN cDNA 9930033D15 gene  
 RIKEN cDNA A430033K04 gene  
 expressed sequence AA408650  
 achalasia, adrenocortical insufficiency, alacrimia (Allgrove, triple-A)  
 acetoacetyl-CoA synthetase  
 acetoacetyl-CoA synthetase  
 arylacetamide deacetylase (esterase)  
 alpha- and gamma-adaptin binding protein  
 4-aminobutyrate aminotransferase  
 ATP-binding cassette, sub-family B (MDR/TAP), member 6  
 ATP-binding cassette, sub-family B (MDR/TAP), member 8  
 ATP-binding cassette, sub-family C (CFTR/MRP), member 3  
 ATP-binding cassette, sub-family D (ALD), member 1  
 ATP-binding cassette, sub-family D (ALD), member 3  
 abhydrolase domain containing 14B  
 abhydrolase domain containing 15  
 abhydrolase domain containing 3

abhydrolase domain containing 4  
acetyl-Coenzyme A acyltransferase 1  
acetyl-Coenzyme A acyltransferase 1  
acetyl-Coenzyme A acyltransferase 1B  
acetyl-Coenzyme A acyltransferase 2  
acetyl-Coenzyme A carboxylase alpha  
acetyl-Coenzyme A carboxylase beta  
acyl-Coenzyme A dehydrogenase family, member 10  
acyl-Coenzyme A dehydrogenase family, member 8  
acyl-Coenzyme A dehydrogenase family, member 9  
acyl-Coenzyme A dehydrogenase family, member 9  
acyl-Coenzyme A dehydrogenase, long chain  
acyl-Coenzyme A dehydrogenase, C-4 to C-12 straight chain  
acyl-Coenzyme A dehydrogenase, C-2 to C-3 short chain  
acyl-Coenzyme A dehydrogenase, very long chain  
acetyl-Coenzyme A acetyltransferase 1  
acetyl-Coenzyme A acetyltransferase 1  
acetyl-Coenzyme A acetyltransferase 1  
acetyl-Coenzyme A acetyltransferase 2  
1-aminocyclopropane-1-carboxylate synthase homolog (Arabidopsis)(non-functional)  
ATP citrate lyase  
ATP citrate lyase  
aconitase 2, mitochondrial  
acyl-CoA thioesterase 1  
acyl-CoA thioesterase 1  
acyl-CoA thioesterase 13  
acyl-CoA thioesterase 2  
acyl-CoA thioesterase 4  
acyl-CoA thioesterase 4  
acyl-CoA thioesterase 8  
acyl-Coenzyme A oxidase 1, palmitoyl  
acyl-Coenzyme A oxidase 1, palmitoyl  
acyl-Coenzyme A oxidase 1, palmitoyl  
acyl-CoA synthetase family member 3  
acyl-CoA synthetase long-chain family member 5  
acyl-CoA synthetase medium-chain family member 5  
aspartoacylase (aminocyclase) 3  
ADAM metallopeptidase domain 28  
adenylate cyclase 6  
alcohol dehydrogenase, iron containing, 1  
acireductone dioxygenase 1  
adiponectin receptor 2  
adiponectin receptor 2  
AFG3 ATPase family gene 3-like 2 (yeast)  
aspartylglucosaminidase  
ATP/GTP binding protein-like 5  
amylo-1, 6-glucosidase, 4-alpha-glucanotransferase  
agmatine ureohydrolase (agmatinase)  
1-acylglycerol-3-phosphate O-acyltransferase 2 (lysophosphatidic acid acyltransferase, beta)  
1-acylglycerol-3-phosphate O-acyltransferase 3  
1-acylglycerol-3-phosphate O-acyltransferase 3  
aminoglycoside phosphotransferase domain containing 1

ATP/GTP binding protein 1  
alanine-glyoxylate aminotransferase 2  
alanine-glyoxylate aminotransferase 2-like 1  
expressed sequence AI317395  
expressed sequence AI317395  
expressed sequence AI317395  
apoptosis-inducing factor, mitochondrion-associated, 3  
adenylate kinase 2  
adenylate kinase 2  
A kinase (PRKA) anchor protein 1  
aldo-keto reductase family 1, member A1 (aldehyde reductase)  
aldo-keto reductase family 1, member C20  
aldo-keto reductase family 7, member A2 (aflatoxin aldehyde reductase)  
aminolevulinate, delta-, dehydratase  
aldehyde dehydrogenase 1 family, member A1  
aldehyde dehydrogenase family 1, subfamily A7  
aldehyde dehydrogenase 2 family (mitochondrial)  
aldehyde dehydrogenase 2 family (mitochondrial)  
aldehyde dehydrogenase 2 family (mitochondrial)  
aldehyde dehydrogenase 3 family, member A2  
aldehyde dehydrogenase 4 family, member A1  
aldehyde dehydrogenase 5 family, member A1  
aldehyde dehydrogenase 6 family, member A1  
aldehyde dehydrogenase 7 family, member A1  
aldehyde dehydrogenase 7 family, member A1  
aldehyde dehydrogenase 9 family, member A1  
aldehyde dehydrogenase 9 family, member A1  
aldolase B, fructose-bisphosphate  
amidohydrolase domain containing 1  
amidohydrolase domain containing 1  
antagonist of mitotic exit network 1 homolog (*S. cerevisiae*)  
amylase, alpha 2A (pancreatic)  
angiopoietin-like 3  
ankylosis, progressive homolog (mouse)  
ankyrin repeat and sterile alpha motif domain containing 4B  
acidic (leucine-rich) nuclear phosphoprotein 32 family, member A  
annexin A6  
annexin A7  
aldehyde oxidase 1  
adaptor-related protein complex 3, mu 1 subunit  
amyloid beta (A4) precursor-like protein 2  
apolipoprotein A-I binding protein  
apolipoprotein A-II  
apolipoprotein A-V  
apolipoprotein C-I  
apolipoprotein C-III  
apolipoprotein E  
apolipoprotein H (beta-2-glycoprotein I)  
apolipoprotein L, 3

adaptor protein, phosphotyrosine interaction, PH domain and leucine zipper containing 2  
aprataxin  
aquaporin 4  
aquaporin 8  
aquaporin 9  
androgen receptor  
actin related protein M1  
cAMP-regulated phosphoprotein, 19kDa  
cAMP-regulated phosphoprotein, 19kDa  
arrestin domain containing 3  
arylsulfatase A  
arylsulfatase B  
arylsulfatase B  
arylsulfatase family, member K  
asialoglycoprotein receptor 1  
aspartoacylase (Canavan disease)  
asparaginase homolog (S. cerevisiae)  
asparaginase like 1  
ATPase family, AAA domain containing 3A  
activating transcription factor 5  
ATG4 autophagy related 4 homolog A (S. cerevisiae)  
ATG5 autophagy related 5 homolog (S. cerevisiae)  
ATG5 autophagy related 5 homolog (S. cerevisiae)  
ATG5 autophagy related 5 homolog (S. cerevisiae)  
ATG7 autophagy related 7 homolog (S. cerevisiae)  
ATG7 autophagy related 7 homolog (S. cerevisiae)  
ATP synthase, H<sup>+</sup> transporting, mitochondrial F<sub>0</sub> complex, subunit B1  
ATP synthase, H<sup>+</sup> transporting, mitochondrial F<sub>0</sub> complex, subunit d  
ATP synthase, H<sup>+</sup> transporting, mitochondrial F<sub>0</sub> complex, subunit F2  
ATPase, class II, type 9A  
ATPase, class II, type 9A  
ATP synthase mitochondrial F1 complex assembly factor 1  
ataxin 10  
expressed sequence AU015680  
expressed sequence AU018778  
AU RNA binding protein/enoyl-Coenzyme A hydratase  
antizyme inhibitor 1  
RIKEN cDNA B230114P17 gene  
butyrobetaine (gamma), 2-oxoglutarate dioxygenase (gamma-butyrobetaine hydroxylase) 1  
butyrobetaine (gamma), 2-oxoglutarate dioxygenase (gamma-butyrobetaine hydroxylase) 1  
cDNA sequence BC026585  
B-cell receptor-associated protein 29  
butyrylcholinesterase  
3-hydroxybutyrate dehydrogenase, type 1  
3-hydroxybutyrate dehydrogenase, type 1  
blocked early in transport 1 homolog (S. cerevisiae)  
bifunctional apoptosis regulator  
betaine-homocysteine methyltransferase  
BH3 interacting domain death agonist  
baculoviral IAP repeat-containing 3  
bolA homolog 3 (E. coli)  
biphenyl hydrolase-like (serine hydrolase)

brain protein l3  
brain protein 44  
Berardinelli-Seip congenital lipodystrophy 2 (seipin)  
chromosome 10 open reading frame 35  
chromosome 10 open reading frame 58  
chromosome 11 open reading frame 1  
chromosome 11 open reading frame 17  
chromosome 11 open reading frame 31  
chromosome 11 open reading frame 51  
chromosome 11 open reading frame 54  
chromosome 11 open reading frame 54  
chromosome 11 open reading frame 71  
chromosome 12 open reading frame 62  
chromosome 12 open reading frame 73  
chromosome 14 open reading frame 145  
chromosome 14 open reading frame 149  
chromosome 14 open reading frame 153  
chromosome 14 open reading frame 159  
chromosome 14 open reading frame 68  
chromosome 16 open reading frame 72  
chromosome 17 open reading frame 37  
chromosome 17 open reading frame 48  
chromosome 17 open reading frame 90  
chromosome 17 open reading frame 90  
chromosome 18 open reading frame 19  
chromosome 18 open reading frame 19  
chromosome 18 open reading frame 55  
chromosome 19 open reading frame 56  
chromosome 19 open reading frame 60  
chromosome 1 open reading frame 128  
chromosome 1 open reading frame 151  
chromosome 1 open reading frame 174  
chromosome 1 open reading frame 210  
chromosome 20 open reading frame 30  
chromosome 20 open reading frame 43  
chromosome 20 open reading frame 43  
chromosome 21 open reading frame 33  
chromosome 22 open reading frame 9  
C2 calcium-dependent domain containing 2  
chromosome 2 open reading frame 47  
chromosome 2 open reading frame 60  
chromosome 6 open reading frame 203  
chromosome 6 open reading frame 89  
chromosome 6 open reading frame 89  
chromosome 6 open reading frame 89  
RIKEN cDNA C730029A08 gene  
RIKEN cDNA C730029A08 gene  
RIKEN cDNA C730049O14 gene  
expressed sequence C78859  
chromosome 7 open reading frame 10  
chromosome 7 open reading frame 59  
chromosome 8 open reading frame 38

chromosome 8 open reading frame 40  
chromosome 8 open reading frame 42  
chromosome 8 open reading frame 82  
chromosome 9 open reading frame 119  
chromosome 9 open reading frame 5  
chromosome 9 open reading frame 69  
carbonic anhydrase III, muscle specific  
carbonic anhydrase III, muscle specific  
carbonic anhydrase III, muscle specific  
carbonic anhydrase VA, mitochondrial  
carbonic anhydrase VIII  
calcium binding protein 39-like  
chaperone, ABC1 activity of bc1 complex homolog (S. pombe)  
calcium channel, voltage-dependent, L type, alpha 1D subunit  
calcium binding and coiled-coil domain 1  
calcium/calmodulin-dependent protein kinase II beta  
calpain, small subunit 1  
calcium regulated heat stable protein 1, 24kDa  
caspase 6, apoptosis-related cysteine peptidase  
calpastatin  
calpastatin  
catalase  
catalase  
caveolin 1, caveolae protein, 22kDa  
carbonyl reductase 4  
coiled-coil domain containing 107  
coiled-coil domain containing 28A  
coiled-coil domain containing 53  
coiled-coil domain containing 58  
coiled-coil domain containing 93  
cyclin G1  
cyclin G1  
cyclin H  
CD36 molecule (thrombospondin receptor)  
CD36 molecule (thrombospondin receptor)  
CD36 molecule (thrombospondin receptor)  
CD59a antigen  
CD81 molecule  
cyclin-dependent kinase 7  
CDV3 homolog (mouse)  
centromere protein V  
carboxylesterase 1 (monocyte/macrophage serine esterase 1)  
carboxylesterase 1 (monocyte/macrophage serine esterase 1)  
carboxylesterase 1 (monocyte/macrophage serine esterase 1)  
carboxylesterase 1  
carboxylesterase 5  
choline dehydrogenase  
choline kinase beta  
chimerin (chimaerin) 2  
choline phosphotransferase 1  
choline phosphotransferase 1



choline phosphotransferase 1  
conserved helix-loop-helix ubiquitous kinase  
cell death-inducing DFFA-like effector b  
CDGSH iron sulfur domain 1  
CDGSH iron sulfur domain 1  
CDGSH iron sulfur domain 3  
cytoplasmic linker associated protein 2  
claudin 2  
calmin (calponin-like, transmembrane)  
calsyntenin 3  
cytidine monophosphate N-acetylneuraminic acid synthetase  
carboxymethylenebutenolidase homolog (Pseudomonas)  
COX assembly mitochondrial protein homolog (S. cerevisiae)  
CKLF-like MARVEL transmembrane domain containing 8  
CCR4-NOT transcription complex, subunit 8  
Coenzyme A synthase  
Coenzyme A synthase  
component of oligomeric golgi complex 4  
collagen, type XIV, alpha 1  
collagen, type IV, alpha 3 (Goodpasture antigen) binding protein  
catechol-O-methyltransferase  
coatamer protein complex, subunit gamma 2  
COP9 constitutive photomorphogenic homolog subunit 6 (Arabidopsis)  
coatamer protein complex, subunit zeta 2  
coenzyme Q2 homolog, prenyltransferase (yeast)  
coenzyme Q5 homolog, methyltransferase (S. cerevisiae)  
coenzyme Q9 homolog (S. cerevisiae)  
coronin, actin binding protein, 1B  
COX15 homolog, cytochrome c oxidase assembly protein (yeast)  
COX19 cytochrome c oxidase assembly homolog (S. cerevisiae)  
cytochrome c oxidase subunit Vb  
cytochrome c oxidase subunit Vib polypeptide 1 (ubiquitous)  
cytochrome c oxidase subunit VIIc  
cytochrome c oxidase subunit 8A (ubiquitous)  
cytochrome c oxidase subunit 8A (ubiquitous)  
coproporphyrinogen oxidase  
coproporphyrinogen oxidase  
carnitine palmitoyltransferase 2  
carnitine palmitoyltransferase 2  
carnitine acetyltransferase  
cellular repressor of E1A-stimulated genes 1  
cellular repressor of E1A-stimulated genes 1  
carnitine O-octanoyltransferase  
crystallin, lambda 1  
crystallin, lambda 1  
crystallin, zeta (quinone reductase)  
crystallin, zeta (quinone reductase)  
citrate synthase  
citrate synthase  
casein kinase 1, gamma 3  
CTAGE family, member 5

cathepsin O  
cullin 4A  
chemokine (C-X-C motif) ligand 9  
cytochrome b5 type B (outer mitochondrial membrane)  
cytochrome b5 type B (outer mitochondrial membrane)  
cytochrome b5 type B (outer mitochondrial membrane)  
cytochrome b5 reductase 3  
cytochrome b5 reductase 3  
cytochrome P450, family 2, subfamily C, polypeptide 18  
cytochrome P450, family 2, subfamily c, polypeptide 29  
cytochrome P450, family 2, subfamily c, polypeptide 38  
cytochrome P450, family 2, subfamily d, polypeptide 26  
cytochrome P450, family 2, subfamily D, polypeptide 6  
cytochrome P450, family 2, subfamily j, polypeptide 5  
cytochrome P450, family 46, subfamily A, polypeptide 1  
cytochrome P450, family 4, subfamily A, polypeptide 11  
cytochrome P450, family 4, subfamily a, polypeptide 14  
cytochrome P450, family 8, subfamily B, polypeptide 1  
cysteinyl leukotriene receptor 1  
RIKEN cDNA D130020L05 gene  
D-2-hydroxyglutarate dehydrogenase  
hypothetical protein D930001B02  
dihydroxyacetone kinase 2 homolog (*S. cerevisiae*)  
death associated protein 3  
death-associated protein kinase 1  
DAZ associated protein 2  
diazepam binding inhibitor (GABA receptor modulator, acyl-Coenzyme A binding protein)  
diazepam binding inhibitor (GABA receptor modulator, acyl-Coenzyme A binding protein)  
diazepam binding inhibitor (GABA receptor modulator, acyl-Coenzyme A binding protein)  
diazepam binding inhibitor (GABA receptor modulator, acyl-Coenzyme A binding protein)  
D site of albumin promoter (albumin D-box) binding protein  
D site of albumin promoter (albumin D-box) binding protein  
DDB1 and CUL4 associated factor 11  
DDB1 and CUL4 associated factor 12-like 1  
dodecenoyl-Coenzyme A delta isomerase (3,2 trans-enoyl-Coenzyme A isomerase)  
DNA cross-link repair 1A (PSO2 homolog, *S. cerevisiae*)  
dynactin 2 (p50)  
dynactin 4 (p62)  
DCN1, defective in cullin neddylation 1, domain containing 4 (*S. cerevisiae*)  
dimethylarginine dimethylaminohydrolase 1  
dimethylarginine dimethylaminohydrolase 1  
dimethylarginine dimethylaminohydrolase 1  
dimethylarginine dimethylaminohydrolase 1  
DDHD domain containing 2  
2,4-dienoyl CoA reductase 1, mitochondrial  
2,4-dienoyl CoA reductase 1, mitochondrial  
DENN/MADD domain containing 2D  
2-deoxyribose-5-phosphate aldolase homolog (*C. elegans*)  
Der1-like domain family, member 2  
diacylglycerol O-acyltransferase homolog 2 (mouse)  
DiGeorge syndrome critical region gene 6

dihydrodiol dehydrogenase (dimeric)  
dehydrogenase/reductase (SDR family) member 4  
dehydrogenase/reductase (SDR family) member 7B  
dehydrogenase E1 and transketolase domain containing 1  
DIP2 disco-interacting protein 2 homolog C (Drosophila)  
DIRAS family, GTP-binding RAS-like 1  
dihydrolipoamide S-acetyltransferase  
dihydrolipoamide S-acetyltransferase  
dihydrolipoamide S-acetyltransferase  
dihydrolipoamide S-succinyltransferase (E2 component of 2-oxo-glutarate complex)  
DnaJ (Hsp40) homolog, subfamily C, member 15  
DnaJ (Hsp40) homolog, subfamily C, member 19  
DnaJ (Hsp40) homolog, subfamily C, member 28  
dedicator of cytokinesis 9  
dipeptidyl-peptidase 4  
dpy-30 homolog (C. elegans)  
dihydropyrimidinase  
dihydropyrimidinase  
DNA-damage regulated autophagy modulator 2  
desmoplakin  
dystrobrevin binding protein 1  
deltex 3-like (Drosophila)  
dual specificity phosphatase 22  
dual specificity phosphatase 23  
dual specificity phosphatase 6  
dynein, light chain, roadblock-type 1  
dynein, light chain, Tctex-type 3  
dynein, light chain, Tctex-type 3  
estrogen receptor binding site associated, antigen, 9  
emopamil binding protein-like  
enoyl Coenzyme A hydratase 1, peroxisomal  
enoyl Coenzyme A hydratase domain containing 3  
enoyl Coenzyme A hydratase, short chain, 1, mitochondrial  
ephrin-A5  
enoyl-Coenzyme A, hydratase/3-hydroxyacyl Coenzyme A dehydrogenase  
eukaryotic translation initiation factor 1  
ELMO/CED-12 domain containing 2  
ELOVL family member 5, elongation of long chain fatty acids (FEN1/Elo2, SUR4/Elo3-like, yeast)  
ELOVL family member 5, elongation of long chain fatty acids (FEN1/Elo2, SUR4/Elo3-like, yeast)  
ELOVL family member 6, elongation of long chain fatty acids (FEN1/Elo2, SUR4/Elo3-like, yeast)  
ELOVL family member 6, elongation of long chain fatty acids (FEN1/Elo2, SUR4/Elo3-like, yeast)  
enolase 1, (alpha)  
enolase 1, (alpha)  
enolase 1, (alpha)  
glutamyl aminopeptidase (aminopeptidase A)  
ectonucleoside triphosphate diphosphohydrolase 5  
enhancer of yellow 2 homolog (Drosophila)

epoxide hydrolase 2, cytoplasmic  
endoplasmic reticulum-golgi intermediate compartment (ERGIC) 1  
ER lipid raft associated 2  
endoplasmic reticulum metallopeptidase 1  
esterase 22  
esterase D/formylglutathione hydrolase  
electron-transferring-flavoprotein dehydrogenase  
ethylmalonic encephalopathy 1  
exosome component 7  
fatty acid binding protein 1, liver  
fatty acid binding protein 1, liver  
fatty acid binding protein 2, intestinal  
Fas (TNFRSF6)-associated via death domain  
fatty acid desaturase domain family, member 6  
fatty acid desaturase domain family, member 6  
fumarylacetoacetate hydrolase domain containing 1  
fumarylacetoacetate hydrolase domain containing 2A  
fumarylacetoacetate hydrolase domain containing 2A  
fumarylacetoacetate hydrolase domain containing 2A  
family with sequence similarity 102, member A  
family with sequence similarity 104, member A  
family with sequence similarity 108, member A1  
family with sequence similarity 108, member A1  
family with sequence similarity 126, member A  
family with sequence similarity 13, member A  
family with sequence similarity 13, member A  
family with sequence similarity 158, member A  
family with sequence similarity 73, member B  
family with sequence similarity 73, member B  
family with sequence similarity 73, member B  
family with sequence similarity 82, member A1  
family with sequence similarity 82, member A1  
family with sequence similarity 82, member A1  
family with sequence similarity 82, member A2  
family with sequence similarity 82, member A2  
family with sequence similarity 89, member A  
fatty acid synthase  
fructose-1,6-bisphosphatase 1  
F-box protein 3  
FCF1 small subunit (SSU) processome component homolog (*S. cerevisiae*)  
fibroblast growth factor receptor-like 1  
fibroblast growth factor receptor-like 1  
fat storage-inducing transmembrane protein 1  
FK506 binding protein 1B, 12.6 kDa  
flightless I homolog (*Drosophila*)  
flightless I homolog (*Drosophila*)  
flavin containing monooxygenase 1  
folliculin interacting protein 2  
ferritin, heavy polypeptide 1  
ferritin, heavy polypeptide 1  
ferritin, light polypeptide

ferritin, light polypeptide  
fucosidase, alpha-L- 1, tissue  
fusion (involved in t(12;16) in malignant liposarcoma)  
fucosyltransferase 11 (alpha (1,3) fucosyltransferase)  
frizzled homolog 4 (Drosophila)  
G0/G1switch 2  
galactokinase 1  
galactose mutarotase (aldose 1-epimerase)  
galactose-1-phosphate uridylyltransferase  
glyceraldehyde-3-phosphate dehydrogenase  
glyceraldehyde-3-phosphate dehydrogenase  
glyceraldehyde-3-phosphate dehydrogenase  
glyceraldehyde-3-phosphate dehydrogenase  
growth arrest-specific 1  
growth arrest-specific 1  
growth arrest-specific 2  
glucan (1,4-alpha-), branching enzyme 1  
guanylate binding protein family, member 6  
guanylate binding protein family, member 6  
glutaryl-Coenzyme A dehydrogenase  
glucokinase (hexokinase 4) regulator  
G elongation factor, mitochondrial 1  
gamma-glutamyl cyclotransferase  
growth hormone inducible transmembrane protein  
GLE1 RNA export mediator homolog (yeast)  
glyoxalase I  
glyoxalase I  
glyoxalase I  
glutaredoxin 5  
GDP-mannose pyrophosphorylase A  
glucosamine-6-phosphate deaminase 1  
glucosamine-6-phosphate deaminase 1  
N-acetylglucosamine-1-phosphate transferase, alpha and beta subunits  
glycerol-3-phosphate acyltransferase, mitochondrial  
glycerol-3-phosphate dehydrogenase 1 (soluble)  
glycerol-3-phosphate dehydrogenase 2 (mitochondrial)  
glycerol-3-phosphate dehydrogenase 2 (mitochondrial)  
glutamic pyruvate transaminase (alanine aminotransferase) 2  
glutathione peroxidase 4 (phospholipid hydroperoxidase)  
GRAM domain containing 3  
glycogen synthase kinase 3 beta  
glutathione S-transferase alpha 5  
glutathione S-transferase alpha 5  
glutathione S-transferase kappa 1  
glutathione S-transferase mu 1  
glutathione S-transferase mu 2 (muscle)  
glutathione S-transferase mu 4  
glutathione S-transferase mu 5  
glutathione S-transferase mu 5  
glutathione S-transferase mu 5  
glutathione S-transferase, mu 6

glutathione S-transferase, theta 3  
glutathione transferase zeta 1  
glycosyltransferase-like domain containing 1  
general transcription factor IIH, polypeptide 5  
GDNF-inducible zinc finger protein 1  
3-hydroxyanthranilate 3,4-dioxygenase  
hydroxyacyl-Coenzyme A dehydrogenase  
hydroxyacyl-Coenzyme A dehydrogenase  
hydroxyacyl-Coenzyme A dehydrogenase  
hydroxyacyl-Coenzyme A dehydrogenase/3-ketoacyl-Coenzyme A thiolase/enoyl-Coenzyme  
hydroxyacyl-Coenzyme A dehydrogenase/3-ketoacyl-Coenzyme A thiolase/enoyl-Coenzyme  
host cell factor C1 regulator 1 (XPO1 dependent)  
hCG1645727  
histone deacetylase 11  
histone deacetylase 11  
histone deacetylase 3  
haloacid dehalogenase-like hydrolase domain containing 2  
hemochromatosis  
homogentisate 1,2-dioxygenase (homogentisate oxidase)  
HGF activator  
3-hydroxyisobutyrate dehydrogenase  
3-hydroxyisobutyrate dehydrogenase  
3-hydroxyisobutyryl-Coenzyme A hydrolase  
homeodomain interacting protein kinase 2  
homeodomain interacting protein kinase 2  
Holliday junction recognition protein  
major histocompatibility complex, class I, C  
major histocompatibility complex, class I, C  
major histocompatibility complex, class II, DQ alpha 1  
major histocompatibility complex, class II, DQ beta 1  
major histocompatibility complex, class II, DR alpha  
holocarboxylase synthetase (biotin-(propionyl-Coenzyme A-carboxylase (ATP-hydrolysing)) ligase)  
3-hydroxymethyl-3-methylglutaryl-Coenzyme A lyase  
3-hydroxy-3-methylglutaryl-Coenzyme A synthase 2 (mitochondrial)  
3-hydroxy-3-methylglutaryl-Coenzyme A synthase 2 (mitochondrial)  
histamine N-methyltransferase  
hook homolog 3 (Drosophila)  
hydroxyprostaglandin dehydrogenase 15-(NAD)  
hydroxyprostaglandin dehydrogenase 15-(NAD)  
heat-responsive protein 12  
heat shock factor binding protein 1  
hydroxysteroid (17-beta) dehydrogenase 10  
hydroxysteroid (17-beta) dehydrogenase 10  
hydroxysteroid (17-beta) dehydrogenase 11  
hydroxysteroid (17-beta) dehydrogenase 12  
hydroxysteroid (17-beta) dehydrogenase 4  
hydroxysteroid (17-beta) dehydrogenase 4  
hydroxy-delta-5-steroid dehydrogenase, 3 beta- and steroid delta-isomerase 7  
hydroxypyruvate isomerase homolog (E. coli)  
isocitrate dehydrogenase 1 (NADP+), soluble

isocitrate dehydrogenase 3 (NAD<sup>+</sup>) gamma  
isocitrate dehydrogenase 3 (NAD<sup>+</sup>) gamma  
interferon-induced protein with tetratricopeptide repeats 1-like  
interferon responsive gene 15  
IMP2 inner mitochondrial membrane peptidase-like (*S. cerevisiae*)  
inhibin, beta E  
indolethylamine N-methyltransferase  
iron-sulfur cluster scaffold homolog (*E. coli*)  
isochorismatase domain containing 1  
isochorismatase domain containing 2b  
integral membrane protein 2B  
kelch repeat and BTB (POZ) domain containing 11  
potassium voltage-gated channel, subfamily H (eag-related), member 3  
3-ketodihydrosphingosine reductase  
KH domain containing, RNA binding, signal transduction associated 3  
ketohehexokinase (fructokinase)  
KIAA0020  
KIAA0020  
KIAA0141  
KIAA0564  
KIAA0564  
KIAA0922  
KIAA1530  
kinesin family member 1B  
Kruppel-like factor 10  
kelch-like 22 (*Drosophila*)  
kelch-like 5 (*Drosophila*)  
keratin 8  
L-2-hydroxyglutarate dehydrogenase  
lactamase, beta 2  
lysosomal-associated membrane protein 2  
LAG1 homolog, ceramide synthase 2  
LAG1 homolog, ceramide synthase 6  
linker for activation of T cells family, member 2  
lysocardiolipin acyltransferase 1  
liver expressed antimicrobial peptide 2  
lectin, galactoside-binding, soluble, 1  
lectin, galactoside-binding, soluble, 1  
lectin, galactoside-binding, soluble, 3 binding protein  
lectin, galactoside-binding, soluble, 8  
lectin, galactoside-binding, soluble, 9B  
phospholysine phosphohistidine inorganic pyrophosphate phosphatase  
lipoic acid synthetase  
lipoic acid synthetase  
lipase A, lysosomal acid, cholesterol esterase  
lipase A, lysosomal acid, cholesterol esterase  
lipase, hepatic  
lipase, endothelial  
lipase, endothelial  
lipoyltransferase 1

ribosomal protein L13 pseudogene 12  
hypothetical protein LOC389203  
hypothetical LOC440335  
cell division cycle 42 pseudogene  
similar to S-phase kinase-associated protein 1A (p19A)  
lon peptidase 2, peroxisomal  
lysophosphatidylcholine acyltransferase 3  
leucine rich repeat containing 28  
leucine-rich repeat kinase 1  
LSM2 homolog, U6 small nuclear RNA associated (*S. cerevisiae*)  
LUC7-like 2 (*S. cerevisiae*)  
LYR motif containing 2  
LYR motif containing 5  
mannose-6-phosphate receptor (cation dependent)  
MACRO domain containing 1  
monoamine oxidase B  
mitogen-activated protein kinase 15  
membrane-associated ring finger (C3HC4) 2  
myristoylated alanine-rich protein kinase C substrate  
mannose-binding lectin (protein C) 2, soluble (opsonic defect)  
muscleblind-like (*Drosophila*)  
methylcrotonoyl-Coenzyme A carboxylase 1 (alpha)  
methylcrotonoyl-Coenzyme A carboxylase 2 (beta)  
methylcrotonoyl-Coenzyme A carboxylase 2 (beta)  
methylmalonyl CoA epimerase  
malate dehydrogenase 1, NAD (soluble)  
malate dehydrogenase 1, NAD (soluble)  
malic enzyme 1, NADP(+)-dependent, cytosolic  
malic enzyme 1, NADP(+)-dependent, cytosolic  
methyltransferase like 5  
methyltransferase like 7B  
mitofusin 2  
O-6-methylguanine-DNA methyltransferase  
microsomal glutathione S-transferase 1  
microsomal glutathione S-transferase 3  
MID1 interacting protein 1 (gastrulation specific G12 homolog (zebrafish))  
mitochondrial intermediate peptidase  
McKusick-Kaufman syndrome  
malectin  
methylmalonic aciduria (cobalamin deficiency) cbID type, with homocystinuria  
membrane metallo-endopeptidase  
monoacylglycerol O-acyltransferase 1  
MOCO sulphurase C-terminal domain containing 1  
mannose-P-dolichol utilization defect 1  
mitochondrial ribosomal protein L14  
mitochondrial ribosomal protein L16  
mitochondrial ribosomal protein L22  
mitochondrial ribosomal protein L39  
mitochondrial ribosomal protein L41  
mitochondrial ribosomal protein L41



mitochondrial ribosomal protein L45  
mitochondrial ribosomal protein L48  
mitochondrial ribosomal protein L49  
mitochondrial ribosomal protein L49  
mitochondrial ribosomal protein S14  
mitochondrial ribosomal protein S16  
mitochondrial ribosomal protein S17  
mitochondrial ribosomal protein S18B  
mitochondrial ribosomal protein S2  
mitochondrial ribosomal protein S27  
mitochondrial ribosomal protein S33  
mitochondrial ribosomal protein S35  
methionine sulfoxide reductase A  
methionine sulfoxide reductase B2  
myotubularin related protein 9  
mechanistic target of rapamycin (serine/threonine kinase)  
metaxin 2  
metaxin 3  
muted homolog (mouse)  
asparaginyl-tRNA synthetase 2, mitochondrial (putative)  
N-acetyltransferase 9 (GCN5-related, putative)  
neutral cholesterol ester hydrolase 1  
non-protein coding RNA 116  
NADH dehydrogenase (ubiquinone) 1 alpha subcomplex, 13  
NADH dehydrogenase (ubiquinone) 1 alpha subcomplex, 3, 9kDa  
NADH dehydrogenase (ubiquinone) 1 alpha subcomplex, 4, 9kDa  
NADH dehydrogenase (ubiquinone) 1 alpha subcomplex, 6, 14kDa  
NADH dehydrogenase (ubiquinone) 1 alpha subcomplex, 7, 14.5kDa  
NADH dehydrogenase (ubiquinone) 1 alpha subcomplex, 7, 14.5kDa  
NADH dehydrogenase (ubiquinone) 1 alpha subcomplex, 9, 39kDa  
NADH dehydrogenase (ubiquinone) 1, alpha/beta subcomplex, 1, 8kDa  
NADH dehydrogenase (ubiquinone) 1 alpha subcomplex, assembly factor 1  
NADH dehydrogenase (ubiquinone) 1 beta subcomplex, 2, 8kDa  
NADH dehydrogenase (ubiquinone) 1 beta subcomplex, 2, 8kDa  
NADH dehydrogenase (ubiquinone) 1 beta subcomplex, 8, 19kDa  
NADH dehydrogenase (ubiquinone) 1 beta subcomplex, 9, 22kDa  
NADH dehydrogenase (ubiquinone) Fe-S protein 1, 75kDa (NADH-coenzyme Q reductase)  
NADH dehydrogenase (ubiquinone) Fe-S protein 5, 15kDa (NADH-coenzyme Q reductase)  
NADH dehydrogenase (ubiquinone) Fe-S protein 5, 15kDa (NADH-coenzyme Q reductase)  
NADH dehydrogenase (ubiquinone) Fe-S protein 6, 13kDa (NADH-coenzyme Q reductase)  
NADH dehydrogenase (ubiquinone) Fe-S protein 8, 23kDa (NADH-coenzyme Q reductase)  
N-terminal EF-hand calcium binding protein 1  
nuclear factor (erythroid-derived 2)-like 1  
nuclear factor (erythroid-derived 2)-like 2  
nuclear factor (erythroid-derived 2)-like 2  
NFU1 iron-sulfur cluster scaffold homolog (S. cerevisiae)  
nipsnap homolog 1 (C. elegans)  
nipsnap homolog 1 (C. elegans)  
nitrilase family, member 2  
nicotinamide nucleotide adenyltransferase 1

nephronophthisis 3 (adolescent)  
NAD(P)H dehydrogenase, quinone 2  
NAD(P)H dehydrogenase, quinone 2  
NAD(P)H dehydrogenase, quinone 2  
nuclear receptor subfamily 1, group D, member 1  
nuclear receptor subfamily 2, group F, member 2  
nuclear receptor subfamily 2, group F, member 2  
NSFL1 (p97) cofactor (p47)  
5'-nucleotidase, ecto (CD73)  
nudix (nucleoside diphosphate linked moiety X)-type motif 1  
nudix (nucleoside diphosphate linked moiety X)-type motif 12  
nudix (nucleoside diphosphate linked moiety X)-type motif 16-like 1  
nudix (nucleoside diphosphate linked moiety X)-type motif 9  
2'-5'-oligoadenylate synthetase-like  
OCIA domain containing 2  
OCIA domain containing 2  
odz, odd Oz/ten-m homolog 3 (Drosophila)  
odz, odd Oz/ten-m homolog 3 (Drosophila)  
olfactomedin 3  
oligodendrocyte transcription factor 1  
optic atrophy 1 (autosomal dominant)  
olfactory receptor, family 2, subfamily T, member 33  
origin recognition complex, subunit 5-like (yeast)  
ORM1-like 1 (S. cerevisiae)  
ORM1-like 3 (S. cerevisiae)  
oxysterol binding protein-like 3  
oxysterol binding protein-like 3  
oxysterol binding protein-like 8  
O-sialoglycoprotein endopeptidase-like 1  
O-sialoglycoprotein endopeptidase-like 1  
ornithine carbamoyltransferase  
oxidoreductase NAD-binding domain containing 1  
protein kinase C and casein kinase substrate in neurons 2  
platelet-activating factor acetylhydrolase, isoform Ib, subunit 1 (45kDa)  
pantothenate kinase 1  
pantothenate kinase 1  
3'-phosphoadenosine 5'-phosphosulfate synthase 1  
progesterin and adipoQ receptor family member VII  
progesterin and adipoQ receptor family member IX  
Parkinson disease (autosomal recessive, early onset) 7  
Parkinson disease (autosomal recessive, early onset) 7  
poly (ADP-ribose) polymerase family, member 9  
phenazine biosynthesis-like protein domain containing  
pre-B-cell leukemia homeobox 1  
pyruvate carboxylase  
pterin-4 alpha-carbinolamine dehydratase/dimerization cofactor of hepatocyte nuclear factor  
pterin-4 alpha-carbinolamine dehydratase/dimerization cofactor of hepatocyte nuclear factor  
propionyl Coenzyme A carboxylase, alpha polypeptide  
proprotein convertase subtilisin/kexin type 4  
proprotein convertase subtilisin/kexin type 6

phosphate cytidyltransferase 1, choline, alpha  
programmed cell death 4 (neoplastic transformation inhibitor)  
programmed cell death 6  
phosphodiesterase 3B, cGMP-inhibited  
pyruvate dehydrogenase (lipoamide) alpha 1  
pyruvate dehydrogenase (lipoamide) beta  
pyruvate dehydrogenase (lipoamide) beta  
pyruvate dehydrogenase kinase, isozyme 1  
pyruvate dehydrogenase kinase, isozyme 1  
pyruvate dehydrogenase kinase, isozyme 1  
pyruvate dehydrogenase kinase, isozyme 2  
p53 and DNA-damage regulated 1  
pyridoxal (pyridoxine, vitamin B6) phosphatase  
PDZ domain containing 1  
phosphatidylethanolamine binding protein 1  
phosphatidylethanolamine binding protein 1  
peroxisomal trans-2-enoyl-CoA reductase  
PERP, TP53 apoptosis effector  
PET112-like (yeast)  
peroxisomal biogenesis factor 1  
peroxisomal biogenesis factor 11 alpha  
peroxisomal biogenesis factor 11 gamma  
peroxisomal biogenesis factor 11 gamma  
peroxisomal biogenesis factor 16  
peroxisomal biogenesis factor 19  
peroxisomal biogenesis factor 19  
peroxisomal biogenesis factor 3  
peroxisomal biogenesis factor 3  
peroxisomal biogenesis factor 5  
peroxisomal biogenesis factor 7  
prefoldin subunit 2  
phosphoglycerate mutase 1 (brain)  
plasma glutamate carboxypeptidase  
phosphogluconate dehydrogenase  
phosphoglucomutase 1  
progesterone receptor membrane component 1  
progesterone receptor membrane component 2  
progesterone receptor membrane component 2  
phosphorylase kinase, alpha 2 (liver)  
phosphatidylinositol glycan anchor biosynthesis, class P  
phosphatidylinositol glycan anchor biosynthesis, class Q  
phosphatidylinositol glycan anchor biosynthesis, class Y  
phosphoinositide-3-kinase, regulatory subunit 6  
PTEN induced putative kinase 1  
PTEN induced putative kinase 1  
phosphatidylinositol transfer protein, cytoplasmic 1  
pyruvate kinase, liver and RBC  
pyruvate kinase, liver and RBC  
pyruvate kinase, liver and RBC  
perilipin 2

peptidase M20 domain containing 1  
peptidase M20 domain containing 1  
phosphomannomutase 1  
paroxysmal nonkinesigenic dyskinesia  
poly(A)-specific ribonuclease (PARN)-like domain containing 1  
polymerase (RNA) III (DNA directed) polypeptide B  
protein-O-mannosyltransferase 1  
paraoxonase 1  
pyrophosphatase (inorganic) 2  
phosphatidic acid phosphatase type 2B  
phosphatidic acid phosphatase type 2B  
peroxisome proliferator-activated receptor alpha  
peroxisome proliferator-activated receptor alpha  
peroxisome proliferator-activated receptor gamma  
phosphopantothenoylcysteine synthetase  
peptidylprolyl isomerase H (cyclophilin H)  
peptidylprolyl isomerase (cyclophilin)-like 3  
protein phosphatase 1B (formerly 2C), magnesium-dependent, beta isoform  
protein phosphatase 1, catalytic subunit, alpha isoform  
protein phosphatase 2, regulatory subunit B', alpha isoform  
PQ loop repeat containing 1  
PQ loop repeat containing 1  
peroxiredoxin 3  
peroxiredoxin 6  
PRELI domain containing 1  
protein kinase, cAMP-dependent, catalytic, beta  
proline synthetase co-transcribed homolog (bacterial)  
PRP19/PSO4 pre-mRNA processing factor 19 homolog (*S. cerevisiae*)  
PRP19/PSO4 pre-mRNA processing factor 19 homolog (*S. cerevisiae*)  
PRP19/PSO4 pre-mRNA processing factor 19 homolog (*S. cerevisiae*)  
proline-rich coiled-coil 1  
paraspeckle component 1  
prostaglandin reductase 2  
prostaglandin reductase 2  
PTK2B protein tyrosine kinase 2 beta  
protein tyrosine phosphatase, mitochondrial 1  
protein tyrosine phosphatase, non-receptor type 6  
protein tyrosine phosphatase, receptor type, D  
protein tyrosine phosphatase, receptor type, D  
protein tyrosine phosphatase, receptor type, D  
6-pyruvoyltetrahydropterin synthase  
pituitary tumor-transforming 1  
pituitary tumor-transforming 1 interacting protein  
phosphorylase, glycogen, liver  
quinoid dihydropteridine reductase  
quinoid dihydropteridine reductase  
RAB14, member RAS oncogene family  
RAB1B, member RAS oncogene family  
RAB2A, member RAS oncogene family  
RAB GTPase activating protein 1-like

retinoic acid receptor responder (tazarotene induced) 2  
Ras association (RalGDS/AF-6) domain family member 3  
Ras association (RalGDS/AF-6) domain family member 6  
RNA binding motif protein 26  
regulator of chromosome condensation (RCC1) and BTB (POZ) domain containing protein 2  
regulator of chromosome condensation (RCC1) and BTB (POZ) domain containing protein 2  
retinol dehydrogenase 14 (all-trans/9-cis/11-cis)  
retinol dehydrogenase 16 (all-trans)  
retinol dehydrogenase 7  
receptor accessory protein 6  
arginine-glutamic acid dipeptide (RE) repeats  
retinol saturase (all-trans-retinol 13,14-reductase)  
retinol saturase (all-trans-retinol 13,14-reductase)  
replication factor C (activator 1) 3, 38kDa  
regucalcin (senescence marker protein-30)  
regulator of G-protein signaling 16  
regulator of G-protein signaling 16  
regulator of G-protein signaling 16  
Rh family, B glycoprotein (gene/pseudogene)  
required for meiotic nuclear division 1 homolog (*S. cerevisiae*)  
required for meiotic nuclear division 5 homolog A (*S. cerevisiae*)  
ring finger protein 125  
ring finger protein 14  
ring finger protein 167  
ring finger protein 181  
roadblock domain containing 3  
RAR-related orphan receptor C  
selenoprotein O  
replication protein A3, 14kDa  
ribose 5-phosphate isomerase A  
ribosomal protein S27-like  
radical S-adenosyl methionine domain containing 2  
reticulon 4  
receptor (chemosensory) transporter protein 4  
runt-related transcription factor 2  
S100 calcium binding protein A1  
S100 calcium binding protein A10  
S100 calcium binding protein A10  
sterile alpha motif domain containing 9-like  
SAR1 homolog B (*S. cerevisiae*)  
sarcosine dehydrogenase  
sarcosine dehydrogenase  
Shwachman-Bodian-Diamond syndrome  
SH3-binding domain kinase 1  
stearoyl-CoA desaturase (delta-9-desaturase)  
stearoyl-CoA desaturase (delta-9-desaturase)  
selenocysteine lyase  
SCO cytochrome oxidase deficient homolog 2 (yeast)  
secernin 3

succinate dehydrogenase complex, subunit C, integral membrane protein, 15kDa  
succinate dehydrogenase complex, subunit D, integral membrane protein  
SEC14-like 2 (*S. cerevisiae*)  
SEC22 vesicle trafficking protein homolog B (*S. cerevisiae*)  
SEC22 vesicle trafficking protein homolog C (*S. cerevisiae*)  
SEC24 family, member C (*S. cerevisiae*)  
SECIS binding protein 2-like  
SEH1-like (*S. cerevisiae*)  
sema domain, immunoglobulin domain (Ig), transmembrane domain (TM) and short  
septin 9  
small EDRK-rich factor 2  
serine hydrolase-like 2  
serpin peptidase inhibitor, clade A (alpha-1 antiproteinase, antitrypsin), member 1  
serpin peptidase inhibitor, clade A (alpha-1 antiproteinase, antitrypsin), member 6  
serpin peptidase inhibitor, clade B (ovalbumin), member 1  
splicing factor 3b, subunit 5, 10kDa  
sideroflexin 1  
sideroflexin 5  
sarcoglycan, gamma (35kDa dystrophin-associated glycoprotein)  
SHANK-associated RH domain interactor  
serine hydroxymethyltransferase 1 (soluble)  
sedoheptulokinase  
sialic acid acetyltransferase  
sirtuin (silent mating type information regulation 2 homolog) 3 (*S. cerevisiae*)  
sirtuin (silent mating type information regulation 2 homolog) 5 (*S. cerevisiae*)  
sirtuin (silent mating type information regulation 2 homolog) 5 (*S. cerevisiae*)  
solute carrier family 10 (sodium/bile acid cotransporter family), member 1  
solute carrier family 10 (sodium/bile acid cotransporter family), member 1  
solute carrier family 12 (potassium/chloride transporters), member 7  
solute carrier family 16, member 2 (monocarboxylic acid transporter 8)  
solute carrier family 16, member 7 (monocarboxylic acid transporter 2)  
solute carrier family 22 (organic cation transporter), member 1  
solute carrier family 22 (extraneuronal monoamine transporter), member 3  
solute carrier family 22 (organic anion transporter), member 9  
solute carrier family 22 (organic anion transporter), member 9  
solute carrier family 22 (organic anion transporter), member 9  
solute carrier family 25 (mitochondrial carrier; dicarboxylate transporter), member 10  
solute carrier family 25 (mitochondrial carrier; dicarboxylate transporter), member 10  
solute carrier family 25 (mitochondrial carrier; oxoglutarate carrier), member 11  
solute carrier family 25 (carnitine/acylcarnitine translocase), member 20  
solute carrier family 25 (carnitine/acylcarnitine translocase), member 20  
solute carrier family 25, member 39  
solute carrier family 25 (mitochondrial carrier; adenine nucleotide translocator), member 6  
solute carrier family 25 (mitochondrial carrier; adenine nucleotide translocator), member 6  
solute carrier family 25 (mitochondrial carrier; adenine nucleotide translocator), member 6  
solute carrier family 25 (mitochondrial carrier; adenine nucleotide translocator), member 6  
solute carrier family 25 (mitochondrial carrier; adenine nucleotide translocator), member 6  
solute carrier family 26 (sulfate transporter), member 1  
solute carrier family 2 (facilitated glucose transporter), member 2

solute carrier family 4, sodium bicarbonate cotransporter, member 4  
solute carrier family 4, sodium bicarbonate cotransporter, member 4  
solute carrier family 5 (sodium-dependent vitamin transporter), member 6  
solute carrier organic anion transporter family, member 1B3  
solute carrier organic anion transporter family, member 2B1  
solute carrier organic anion transporter family, member 2B1  
SWI/SNF related, matrix associated, actin dependent regulator of chromatin, subfamily a, member 4  
SWI/SNF related, matrix associated, actin dependent regulator of chromatin, subfamily c, member 2  
SET and MYND domain containing 2  
small nucleolar RNA host gene 11 (non-protein coding)  
SNF related kinase  
small nuclear ribonucleoprotein 27kDa (U4/U6.U5)  
small nuclear ribonucleoprotein polypeptide N  
sorting nexin 19  
sorting nexin 9  
superoxide dismutase 1, soluble  
sorbin and SH3 domain containing 1  
sorbin and SH3 domain containing 1  
sorbin and SH3 domain containing 1  
SPC24, NDC80 kinetochore complex component, homolog (S. cerevisiae)  
secreted phosphoprotein 2, 24kDa  
spectrin, beta, non-erythrocytic 1  
U2-associated SR140 protein  
sarcalumenin  
signal recognition particle 14kDa (homologous Alu RNA binding protein)  
signal recognition particle 14kDa (homologous Alu RNA binding protein)  
serine racemase  
StAR-related lipid transfer (START) domain containing 5  
signal transducer and activator of transcription 1, 91kDa  
serine/threonine kinase 25 (STE20 homolog, yeast)  
stomatin  
stomatin (EPB72)-like 2  
STE20-related kinase adaptor beta  
SUB1 homolog (S. cerevisiae)  
succinate-CoA ligase, ADP-forming, beta subunit  
succinate-CoA ligase, ADP-forming, beta subunit  
succinate-CoA ligase, alpha subunit  
succinate-CoA ligase, GDP-forming, beta subunit  
succinate-CoA ligase, GDP-forming, beta subunit  
succinate receptor 1  
sulfatase 2  
sulfite oxidase  
surfeit 1  
suppressor of zeste 12 homolog (Drosophila)  
synapse associated protein 1, SAP47 homolog (Drosophila)  
transaldolase 1  
tubulin folding cofactor E  
tubulin folding cofactor E-like  
tubulin folding cofactor E-like

transcobalamin II; macrocytic anemia  
transcobalamin II; macrocytic anemia  
transcobalamin II; macrocytic anemia  
T-cell leukemia translocation altered gene  
T-cell leukemia translocation altered gene  
transcription factor AP-2 gamma (activating enhancer binding protein 2 gamma)  
transcription factor CP2-like 1  
tissue factor pathway inhibitor 2  
transforming growth factor, beta receptor associated protein 1  
thymocyte selection associated  
threonine synthase-like 2 (*S. cerevisiae*)  
thyroid hormone responsive (SPOT14 homolog, rat)  
thyroid hormone responsive (SPOT14 homolog, rat)  
thymocyte nuclear protein 1  
T-cell immunoglobulin and mucin domain containing 2  
translocase of inner mitochondrial membrane 44 homolog (yeast)  
transketolase  
transketolase  
TLC domain containing 1  
transmembrane 4 L six family member 1  
transmembrane 9 superfamily member 3  
transmembrane BAX inhibitor motif containing 6  
transmembrane protein 106B  
transmembrane protein 109  
transmembrane protein 120A  
transmembrane protein 123  
transmembrane protein 134  
transmembrane protein 135  
transmembrane protein 144  
transmembrane protein 14C  
transmembrane protein 18  
transmembrane protein 184B  
transmembrane protein 192  
transmembrane protein 192  
transmembrane protein 203  
transmembrane inner ear  
transmembrane inner ear  
translocase of outer mitochondrial membrane 70 homolog A (*S. cerevisiae*)  
tropomyosin 2 (beta)  
tropomyosin 2 (beta)  
tumor protein p63 regulated 1-like  
TP53RK binding protein  
TP53RK binding protein  
trafficking protein particle complex 4  
tripartite motif-containing 25  
tripartite motif-containing 25  
tripartite motif-containing 5  
tripartite motif-containing 5  
TruB pseudouridine (psi) synthase homolog 1 (*E. coli*)



translin  
translin-associated factor X  
tetraspanin 14  
thiosulfate sulfurtransferase (rhodanese)  
tetratricopeptide repeat domain 23  
transthyretin  
transthyretin  
transthyretin  
transthyretin  
TRAF and TNF receptor associated protein  
tumor suppressor candidate 2  
thioredoxin  
thioredoxin interacting protein  
thioredoxin-like 4B  
thioredoxin reductase 2  
ubiquitin-like modifier activating enzyme 5  
ubiquitin-conjugating enzyme E2D 3 (UBC4/5 homolog, yeast)  
ubiquitin-conjugating enzyme E2D 3 (UBC4/5 homolog, yeast)  
ubiquitin-conjugating enzyme E2E 2 (UBC4/5 homolog, yeast)  
ubiquitin-conjugating enzyme E2I (UBC9 homolog, yeast)  
ubiquitin-conjugating enzyme E2L 3  
ubiquitin-like 7 (bone marrow stromal cell-derived)  
ubiquitin protein ligase E3 component n-recognin 3 (putative)  
UBX domain protein 4  
uridine-cytidine kinase 1  
ubiquinol-cytochrome c reductase complex (7.2 kD)  
UDP-glucose pyrophosphorylase 2  
UDP glucuronosyltransferase 1 family, polypeptide A3  
UDP glycosyltransferase 3 family, polypeptide A2  
UDP glycosyltransferase 3 family, polypeptide A2  
UHRF1 binding protein 1  
urate oxidase (pseudogene)  
ubiquinol-cytochrome c reductase complex chaperone  
ubiquinol-cytochrome c reductase, 6.4kDa subunit  
ubiquinol-cytochrome c reductase binding protein  
ubiquinol-cytochrome c reductase core protein II  
ubiquinol-cytochrome c reductase, complex III subunit VII, 9.5kDa  
ubiquitin related modifier 1 homolog (S. cerevisiae)  
urocanase domain containing 1  
ubiquitin specific peptidase 22  
uronyl-2-sulfotransferase  
vesicle amine transport protein 1 homolog (T. californica)  
voltage-dependent anion channel 1  
vanin 1  
vanin 1

vacuolar protein sorting 41 homolog (*S. cerevisiae*)  
 vacuolar protein sorting 41 homolog (*S. cerevisiae*)  
 vesicle transport through interaction with t-SNAREs homolog 1B (yeast)  
 von Willebrand factor C and EGF domains  
 WD repeat domain 61  
 WEE1 homolog (*S. pombe*)  
 WAP four-disulfide core domain 2  
 WW domain containing transcription regulator 1  
 exportin 6  
 exportin, tRNA (nuclear export receptor for tRNAs)  
 exportin, tRNA (nuclear export receptor for tRNAs)  
 exportin, tRNA (nuclear export receptor for tRNAs)  
 xylulokinase homolog (*H. influenzae*)  
 Yip1 interacting factor homolog A (*S. cerevisiae*)  
 Yip1 domain family, member 4  
 zinc binding alcohol dehydrogenase domain containing 2  
 zinc finger, BED-type containing 5  
 zinc finger, AN1-type domain 1  
 zinc finger protein 64 homolog (mouse)  
 zinc finger protein 277  
 zinc finger protein 761  
 zinc finger, SWIM-type containing 7

## Supp. Table 2

### TERT Liver 148 probe sets upregulated

#### Entrez Gene Name

RIKEN cDNA 0610040F04 gene  
 RIKEN cDNA 1100001G20 gene  
 RIKEN cDNA 1700092E16 gene  
 RIKEN cDNA 4921506L19 gene  
 RIKEN cDNA 4933415B22 gene  
 RIKEN cDNA 5033425B01 gene  
 RIKEN cDNA 5330421C15 gene  
 ATP-binding cassette, sub-family A (ABC1), member 2  
 ankyrin repeat and BTB (POZ) domain containing 2  
 acyl-CoA synthetase long-chain family member 4  
 ADAM metalloproteinase domain 23  
 angiogenin, ribonuclease, RNase A family, 5  
 ankyrin repeat and zinc finger domain containing 1  
 adenine phosphoribosyltransferase  
 apolipoprotein A-I  
 apolipoprotein A-I  
 apolipoprotein A-I  
 apolipoprotein M  
 apolipoprotein M  
 adenine phosphoribosyltransferase

chromosome 16 open reading frame 5  
complement component 1, r subcomponent  
complement component 2  
complement component 2  
complement component 2  
chromosome 21 open reading frame 59  
chromosome 21 open reading frame 91  
chromosome 4 open reading frame 40  
complement component 5  
complement component 6  
complement component 8, alpha polypeptide  
complement component 8, beta polypeptide  
complement component 9  
CD209 molecule  
CCAAT/enhancer binding protein (C/EBP), beta  
cysteine-rich hydrophobic domain 2  
chitinase domain containing 1  
claudin 14  
cytidine monophosphate-N-acetylneuraminic acid hydroxylase (CMP-N-acetylneuraminic acid hydroxylase)  
CREB regulated transcription coactivator 2  
casein kinase 1, delta  
cytochrome P450, family 2, subfamily c, polypeptide 70  
cytochrome P450, family 7, subfamily B, polypeptide 1  
DEAD (Asp-Glu-Ala-Asp) box polypeptide 21  
DEAD (Asp-Glu-Ala-Asp) box polypeptide 27  
dipeptidyl-peptidase 7  
dystonin  
dystonin  
epidermal growth factor receptor (erythroblastic leukemia viral (v-erb-b) oncogene homolog, avian)  
epidermal growth factor receptor (erythroblastic leukemia viral (v-erb-b) oncogene homolog, avian)  
epidermal growth factor receptor (erythroblastic leukemia viral (v-erb-b) oncogene homolog, avian)  
erythrocyte membrane protein band 4.1 (elliptocytosis 1, RH-linked)  
ERBB receptor feedback inhibitor 1  
coagulation factor XI  
ficolin (collagen/fibrinogen domain containing lectin) 2 (hucolin)  
fetuin B  
fibroblast growth factor receptor 1  
fibronectin type III domain containing 3B  
GDNF family receptor alpha 1  
GDNF family receptor alpha 1  
GDNF family receptor alpha 1  
glutaredoxin (thioltransferase)  
glutaredoxin (thioltransferase)  
glucosamine (UDP-N-acetyl)-2-epimerase/N-acetylmannosamine kinase  
high density lipoprotein binding protein  
huntingtin interacting protein 1 related  
HOP homeobox  
heparan sulfate (glucosamine) 3-O-sulfotransferase 3B1

insulin-like growth factor binding protein 4  
interleukin 17 receptor A  
interleukin 1 receptor, type I  
interleukin 6 receptor  
interferon regulatory factor 5  
inter-alpha (globulin) inhibitor H5  
inositol 1,4,5-triphosphate receptor, type 2  
ribosomal protein L13 pseudogene 12  
leucine rich repeat containing 24  
lipolysis stimulated lipoprotein receptor  
monooxygenase, DBH-like 1  
murinoglobulin 1  
mucin-like protocadherin  
nuclear receptor subfamily 3, group C, member 1 (glucocorticoid receptor)  
osteosarcoma amplified 9, endoplasmic reticulum lectin  
paired box 4  
paternally expressed 3  
phosphatase and actin regulator 4  
phosphatidylinositol-4-phosphate 5-kinase-like 1  
protein-O-mannosyltransferase 2  
peptidylprolyl isomerase B (cyclophilin B)  
protein phosphatase 1, regulatory (inhibitor) subunit 10  
peroxiredoxin 4  
protein tyrosine phosphatase, receptor type, O  
ribosomal protein L12  
ribosomal protein L13a  
ribosomal protein, large, P0  
ribosomal protein S12  
ribosomal protein S16  
ribosomal protein S3  
ribosomal protein S7  
ribosomal protein S8  
ribosomal RNA processing 15 homolog (*S. cerevisiae*)  
serum amyloid A4, constitutive  
scavenger receptor class A, member 5 (putative)  
syndecan 4  
serine dehydratase  
Sec61 alpha 1 subunit (*S. cerevisiae*)  
serine incorporator 3  
serine incorporator 3  
serpin peptidase inhibitor, clade A (alpha-1 antiproteinase, antitrypsin), member 1  
serpin peptidase inhibitor, clade A (alpha-1 antiproteinase, antitrypsin), member 11  
serine (or cysteine) peptidase inhibitor, clade A, member 3K  
SET domain containing (lysine methyltransferase) 7  
Src homology 2 domain containing adaptor protein B  
SKI-like oncogene  
solute carrier family 1 (neutral amino acid transporter), member 5  
solute carrier family 38, member 2

tyrosine aminotransferase  
transmembrane protein 87A  
tumor necrosis factor receptor superfamily, member 12A  
tyrosylprotein sulfotransferase 1  
unc-13 homolog B (*C. elegans*)  
vitronectin  
WAS protein family, member 2  
WD repeat and FYVE domain containing 1  
WD repeat domain 82  
WD repeat domain, phosphoinositide interacting 1  
X-box binding protein 1

## Supp. Table 3 Heart TERT

### Decreased 1406 probe sets in G4 mTERT hearts

#### Entrez Gene Name

RIKEN cDNA 1200016E24 gene  
RIKEN cDNA 1200016E24 gene  
RIKEN cDNA 1200016E24 gene  
RIKEN cDNA 1200016E24 gene  
RIKEN cDNA 1810026B05 gene  
RIKEN cDNA 2210016H18 gene  
RIKEN cDNA 2310002L09 gene  
RIKEN cDNA 2310076G13 gene  
RIKEN cDNA 2700097O09 gene  
RIKEN cDNA 2810455D13 gene  
RIKEN cDNA 2810482I07 gene  
glyceraldehyde-3-phosphate dehydrogenase pseudogene  
RIKEN cDNA 3021401C12 gene  
RIKEN cDNA 4930519G04 gene  
RIKEN cDNA 5430402M21 gene  
RIKEN cDNA 5730458M16 gene  
RIKEN cDNA 6330564D18 gene  
RIKEN cDNA 8430436O14 gene  
RIKEN cDNA 9330175E14 gene  
RIKEN cDNA 9530006C21 gene  
RIKEN cDNA A130040M12 gene  
RIKEN cDNA A530047J11 gene  
RIKEN cDNA A530079E22 gene  
AP2 associated kinase 1  
aminoadipate-semialdehyde dehydrogenase-phosphopantetheinyl transferase  
ATP-binding cassette, sub-family C (CFTR/MRP), member 4  
abhydrolase domain containing 12  
abhydrolase domain containing 4  
abl-interactor 1  
actin binding LIM protein 1  
ankyrin repeat and BTB (POZ) domain containing 2  
acyl-Coenzyme A binding domain containing 4  
acyl-Coenzyme A binding domain containing 5  
acyl-CoA thioesterase 13  
acyl-CoA thioesterase 9  
acyl-CoA thioesterase 9  
actinin, alpha 2  
ADAM metalloproteinase with thrombospondin type 1 motif, 9  
ADAMTS-like 3  
adenylate cyclase 5  
adiponectin receptor 1  
2-aminoethanethiol (cysteamine) dioxygenase  
AE binding protein 2  
1-acylglycerol-3-phosphate O-acyltransferase 1 (lysophosphatidic acid acyltransferase, alpha)  
AHNAK nucleoprotein 2  
aryl hydrocarbon receptor  
expressed sequence AI117581  
akirin 2

v-akt murine thymoma viral oncogene homolog 1  
aldehyde dehydrogenase 1 family, member A2  
aldehyde dehydrogenase 6 family, member A1  
aldolase A, fructose-bisphosphate  
aldolase A, fructose-bisphosphate  
arachidonate 5-lipoxygenase-activating protein  
adenosine monophosphate deaminase (isoform E)  
ankyrin repeat and KH domain containing 1  
ankyrin repeat domain 12  
anoctamin 6  
AN1, ubiquitin-like, homolog (*Xenopus laevis*)  
adaptor-related protein complex 1, sigma 2 subunit  
adaptor-related protein complex 3, delta 1 subunit  
apolipoprotein D  
amyloid beta (A4) precursor protein  
adaptor protein, phosphotyrosine interaction, PH domain and leucine zipper containing 1  
adaptor protein, phosphotyrosine interaction, PH domain and leucine zipper containing 2  
ADP-ribosylation factor 4  
ADP-ribosylation factor 6  
ADP-ribosylation factor guanine nucleotide-exchange factor 1(brefeldin A-inhibited)  
ADP-ribosylation factor related protein 1  
Rho GTPase activating protein 21  
Rho GTPase activating protein 29  
Rho GTPase activating protein 5  
Rac/Cdc42 guanine nucleotide exchange factor (GEF) 6  
AT rich interactive domain 2 (ARID, RFX-like)  
AT rich interactive domain 4B (RBP1-like)  
ADP-ribosylation factor-like 6 interacting protein 1  
arrestin, beta 2  
ADP-ribosyltransferase 3  
N-acylsphingosine amidohydrolase (acid ceramidase) 1  
ankyrin repeat and SOCS box-containing 11  
arsA arsenite transporter, ATP-binding, homolog 1 (bacterial)  
additional sex combs like 1 (*Drosophila*)  
arginyltransferase 1  
ATG4 autophagy related 4 homolog A (*S. cerevisiae*)  
atlastin GTPase 2  
ATPase, class VI, type 11B  
ATPase, Na<sup>+</sup>/K<sup>+</sup> transporting, beta 1 polypeptide  
ATP synthase, H<sup>+</sup> transporting, mitochondrial F0 complex, subunit B1  
ATPase, H<sup>+</sup> transporting, lysosomal 21kDa, V0 subunit b  
ATPase, H<sup>+</sup> transporting, lysosomal 21kDa, V0 subunit b  
ATPase, H<sup>+</sup> transporting, lysosomal 16kDa, V0 subunit c  
ATPase, H<sup>+</sup> transporting, lysosomal 38kDa, V0 subunit d1  
ATPase, H<sup>+</sup> transporting, lysosomal 56/58kDa, V1 subunit B2  
ATPase, H<sup>+</sup> transporting, lysosomal 34kDa, V1 subunit D  
ATPase, H<sup>+</sup> transporting, lysosomal 34kDa, V1 subunit D  
ATPase, H<sup>+</sup> transporting, lysosomal 34kDa, V1 subunit D  
ATPase, H<sup>+</sup> transporting, lysosomal 13kDa, V1 subunit G1  
ATPase, Cu<sup>++</sup> transporting, alpha polypeptide  
ATPase, aminophospholipid transporter (APLT), class I, type 8A, member 1  
ATPase, aminophospholipid transporter (APLT), class I, type 8A, member 1

ATPase inhibitory factor 1  
ataxia telangiectasia and Rad3 related  
ataxin 7  
expressed sequence AU015263  
expressed sequence AW011738  
RIKEN cDNA B230214O09 gene  
RIKEN cDNA B230354K17 gene  
RIKEN cDNA B430203M17 gene  
UDP-Gal:betaGlcNAc beta 1,4- galactosyltransferase, polypeptide 1  
UDP-Gal:betaGlcNAc beta 1,4- galactosyltransferase, polypeptide 6  
barrier to autointegration factor 1  
HLA-B associated transcript 1  
BAT2 domain containing 1  
HLA-B associated transcript 3  
Bardet-Biedl syndrome 2  
BCL2-associated transcription factor 1  
BCL2-associated transcription factor 1  
BMI1 polycomb ring finger oncogene  
BMS1 homolog, ribosome assembly protein (yeast)  
BCL2/adenovirus E1B interacting protein 3  
bromodomain PHD finger transcription factor  
BRCA1/BRCA2-containing complex, subunit 3  
bromodomain and WD repeat domain containing 1  
BTB (POZ) domain containing 6  
basic transcription factor 3  
basic transcription factor 3  
BUD31 homolog (yeast)  
chromosome 10 open reading frame 10  
chromosome 10 open reading frame 107  
chromosome 10 open reading frame 58  
chromosome 12 open reading frame 24  
chromosome 12 open reading frame 35  
chromosome 12 open reading frame 53  
hypothetical protein C130006E23  
chromosome 13 open reading frame 37  
chromosome 15 open reading frame 57  
chromosome 16 open reading frame 14  
chromosome 16 open reading frame 52  
chromosome 16 open reading frame 72  
chromosome 16 open reading frame 91  
chromosome 18 open reading frame 19  
chromosome 19 open reading frame 42  
chromosome 1 open reading frame 21  
chromosome 1 open reading frame 21  
chromosome 1 open reading frame 43  
chromosome 1 open reading frame 58  
chromosome 1 open reading frame 86  
complement component 1, q subcomponent, A chain  
complement component 1, q subcomponent, B chain  
complement component 1, q subcomponent, B chain  
complement component 1, q subcomponent, B chain  
complement component 1, q subcomponent binding protein



complement component 1, q subcomponent, C chain  
complement component 1, r subcomponent  
chromosome 20 open reading frame 196  
chromosome 20 open reading frame 196  
chromosome 20 open reading frame 24  
chromosome 2 open reading frame 67  
complement component 3a receptor 1  
RIKEN cDNA C430014K11 gene  
chromosome 4 open reading frame 29  
chromosome 5 open reading frame 51  
chromosome 5 open reading frame 53  
chromosome 6 open reading frame 125  
chromosome 6 open reading frame 136  
chromosome 6 open reading frame 162  
chromosome 6 open reading frame 62  
chromosome 6 open reading frame 72  
chromosome 6 open reading frame 72  
hypothetical protein C730026J16  
chromosome 7 open reading frame 60  
chromosome 8 open reading frame 4  
chromosome 8 open reading frame 59  
chromosome 9 open reading frame 40  
chromosome 9 open reading frame 41  
chromosome 9 open reading frame 85  
calcium binding protein 39  
calcitonin receptor-like  
caldesmon 1  
calmodulin 1 (phosphorylase kinase, delta)  
calmodulin 1 (phosphorylase kinase, delta)  
calmodulin 1 (phosphorylase kinase, delta)  
calreticulin  
calreticulin  
calreticulin  
calcium/calmodulin-dependent protein kinase II delta  
calcium/calmodulin-dependent protein kinase II inhibitor 1  
calcium/calmodulin-dependent protein kinase kinase 2, beta  
calnexin  
capping protein (actin filament), gelsolin-like  
cell cycle associated protein 1  
cell cycle associated protein 1  
capping protein (actin filament) muscle Z-line, alpha 1  
capping protein (actin filament) muscle Z-line, alpha 1  
capping protein (actin filament) muscle Z-line, alpha 2  
caspase recruitment domain family, member 10  
caspase 12  
carbonyl reductase 2  
chromobox homolog 1 (HP1 beta homolog Drosophila )  
cell division cycle and apoptosis regulator 1  
cell division cycle and apoptosis regulator 1  
cysteine conjugate-beta lyase, cytoplasmic  
coiled-coil domain containing 127  
coiled-coil domain containing 41

coiled-coil domain containing 80  
coiled-coil domain containing 82  
chemokine (C-C motif) ligand 6  
chemokine (C-C motif) ligand 6  
chemokine (C-C motif) ligand 8  
chemokine (C-C motif) ligand 9  
cyclin I  
cyclin I  
cyclin L2  
chaperonin containing TCP1, subunit 3 (gamma)  
chaperonin containing TCP1, subunit 4 (delta)  
CD164 molecule, sialomucin  
CD38 molecule  
CD44 molecule (Indian blood group)  
CD47 molecule  
CD53 molecule  
CD81 molecule  
CDC14 cell division cycle 14 homolog B (*S. cerevisiae*)  
cell division cycle 37 homolog (*S. cerevisiae*)-like 1  
cyclin-dependent kinase 2 associated protein 1  
CDKN2A interacting protein N-terminal like  
CDP-diacylglycerol synthase (phosphatidate cytidyltransferase) 2  
CDV3 homolog (mouse)  
CCAAT/enhancer binding protein (C/EBP), zeta  
centrosomal protein 120kDa  
centrosomal protein 350kDa  
centrosomal protein 68kDa  
complement factor properdin  
coiled-coil-helix-coiled-coil-helix domain containing 1  
coiled-coil-helix-coiled-coil-helix domain containing 2  
coiled-coil-helix-coiled-coil-helix domain containing 3  
chromodomain helicase DNA binding protein 6  
choroideremia-like (Rab escort protein 2)  
choline phosphotransferase 1  
cytokine inducible SH2-containing protein  
cytoskeleton-associated protein 4  
chemokine-like factor  
chloride channel CLIC-like 1  
claudin 12  
claudin domain containing 1  
C-type lectin domain family 1, member A  
chloride intracellular channel 5  
chloride intracellular channel 5  
CAP-GLY domain containing linker protein 1  
CAP-GLY domain containing linker protein 1  
CAP-GLY domain containing linker protein family, member 4  
CAP-GLY domain containing linker protein family, member 4  
ceroid-lipofuscinosis, neuronal 6, late infantile, variant  
CLPTM1-like

clathrin, heavy chain (Hc)  
clusterin  
clusterin  
clusterin  
CCHC-type zinc finger, nucleic acid binding protein  
CNDP dipeptidase 2 (metallopeptidase M20 family)  
CNDP dipeptidase 2 (metallopeptidase M20 family)  
cornichon homolog 4 (Drosophila)  
cornichon homolog 4 (Drosophila)  
connector enhancer of kinase suppressor of Ras 1  
CCR4-NOT transcription complex, subunit 2  
CCR4-NOT transcription complex, subunit 4  
CCR4-NOT transcription complex, subunit 7  
COBL-like 1  
COBL-like 1  
COP9 constitutive photomorphogenic homolog subunit 3 (Arabidopsis)  
COP9 constitutive photomorphogenic homolog subunit 6 (Arabidopsis)  
COP9 constitutive photomorphogenic homolog subunit 7A (Arabidopsis)  
coronin, actin binding protein, 1A  
COX10 homolog, cytochrome c oxidase assembly protein, heme A: farnesyltransferase (yeast)  
COX17 cytochrome c oxidase assembly homolog (S. cerevisiae)  
cytochrome c oxidase subunit Va  
cytochrome c oxidase subunit Va  
cytochrome c oxidase subunit Vib polypeptide 1 (ubiquitous)  
cytochrome c oxidase subunit VIIa polypeptide 2 (liver)  
ceruloplasmin (ferroxidase)  
cytoplasmic polyadenylation element binding protein 3  
cytoplasmic polyadenylation element binding protein 3  
cytoplasmic polyadenylation element binding protein 4  
cleavage and polyadenylation specific factor 6, 68kDa  
cleavage and polyadenylation specific factor 6, 68kDa  
carboxypeptidase X (M14 family), member 2  
cAMP responsive element binding protein 1  
cold shock domain protein A  
cold shock domain protein A  
colony stimulating factor 1 receptor  
colony stimulating factor 1 receptor  
colony stimulating factor 2 receptor, alpha, low-affinity (granulocyte-macrophage)  
casein kinase 1, gamma 3  
cleavage stimulation factor, 3' pre-RNA, subunit 2, 64kDa, tau variant  
C-terminal binding protein 2  
CTD (carboxy-terminal domain, RNA polymerase II, polypeptide A) small phosphatase 2  
cytotoxic T lymphocyte-associated protein 2 alpha  
cathepsin C  
cathepsin O  
cathepsin S  
CUG triplet repeat, RNA binding protein 2  
CUG triplet repeat, RNA binding protein 2  
CWF19-like 2, cell cycle control (S. pombe)  
chemokine (C-X-C motif) ligand 12 (stromal cell-derived factor 1)  
chemokine (C-X-C motif) ligand 12 (stromal cell-derived factor 1)

chromosome X open reading frame 56  
cytochrome b5 reductase 4  
cytochrome b-245, alpha polypeptide  
cylindromatosis (turban tumor syndrome)  
cytochrome P450, family 4, subfamily a, polypeptide 29  
cytohesin 1 interacting protein  
DAZ associated protein 2  
decorin  
dynactin 3 (p22)  
dynactin 4 (p62)  
dolichyl-diphosphooligosaccharide-protein glycosyltransferase  
DEAD (Asp-Glu-Ala-Asp) box polypeptide 1  
DEAD (Asp-Glu-Ala-Asp) box polypeptide 17  
DEAD (Asp-Glu-Ala-Asp) box polypeptide 5  
DEAD (Asp-Glu-Ala-Asp) box polypeptide 5  
degenerative spermatocyte homolog 1, lipid desaturase (Drosophila)  
DENN/MADD domain containing 4C  
diacylglycerol kinase, zeta 104kDa  
diacylglycerol kinase, zeta 104kDa  
deoxyhypusine synthase  
DEAH (Asp-Glu-Ala-His) box polypeptide 15  
DEAH (Asp-Glu-Ala-His) box polypeptide 15  
DEAH (Asp-Glu-Ala-His) box polypeptide 9  
death inducer-obliterator 1  
DIX domain containing 1  
prostatic androgen-repressed message-1  
deleted in liver cancer 1  
deleted in liver cancer 1  
discs, large homolog 1 (Drosophila)  
dystrophia myotonica, WD repeat containing  
Dmx-like 2  
DnaJ (Hsp40) homolog, subfamily B, member 6  
DnaJ (Hsp40) homolog, subfamily B, member 9  
DnaJ (Hsp40) homolog, subfamily C, member 12  
DnaJ (Hsp40) homolog, subfamily C, member 14  
DnaJ (Hsp40) homolog, subfamily C, member 15  
DnaJ (Hsp40) homolog, subfamily C, member 3  
DnaJ (Hsp40) homolog, subfamily C, member 9  
dynamin 1-like  
dynamin 2  
aspartyl aminopeptidase  
DPH3, KTI11 homolog (S. cerevisiae)  
dermatopontin  
DNA-damage regulated autophagy modulator 2  
dual specificity phosphatase 18  
dual specificity phosphatase 6  
dymeclin  
dynein, light chain, Tctex-type 1  
DAZ interacting protein 3, zinc finger  
RIKEN cDNA E230013L22 gene  
endothelial differentiation-related factor 1

embryonic ectoderm development  
eukaryotic translation elongation factor 1 delta (guanine nucleotide exchange protein)  
EF-hand domain family, member D2  
EH-domain containing 4  
eukaryotic translation initiation factor 1  
eukaryotic translation initiation factor 1A, X-linked  
eukaryotic translation initiation factor 1A, Y-linked  
eukaryotic translation initiation factor 2C, 3  
eukaryotic translation initiation factor 3, subunit A  
eukaryotic translation initiation factor 3, subunit F  
eukaryotic translation initiation factor 3, subunit G  
eukaryotic translation initiation factor 3, subunit J  
eukaryotic translation initiation factor 3, subunit L  
eukaryotic translation initiation factor 4A, isoform 1  
eukaryotic translation initiation factor 4 gamma, 2  
eukaryotic translation initiation factor 4H  
eukaryotic translation initiation factor 5  
eukaryotic translation initiation factor 6  
EGF, latrophilin and seven transmembrane domain containing 1  
enabled homolog (Drosophila)  
enabled homolog (Drosophila)  
endoglin  
ectonucleotide pyrophosphatase/phosphodiesterase 2  
enhancer of polycomb homolog 2 (Drosophila)  
glutamyl-prolyl-tRNA synthetase  
erythroid differentiation regulator 1  
ERGIC and golgi 2  
endoplasmic reticulum lectin 1  
ERO1-like (S. cerevisiae)  
ERO1-like (S. cerevisiae)  
ERO1-like (S. cerevisiae)  
eukaryotic translation termination factor 1  
ets variant 5  
ets variant 5  
Ewing sarcoma breakpoint region 1  
exonuclease 3'-5' domain containing 2  
exocyst complex component 3  
exocyst complex component 5  
exocyst complex component 6  
exosome component 10  
enhancer of zeste homolog 1 (Drosophila)  
coagulation factor XIII, A1 polypeptide  
fatty acid binding protein 4, adipocyte  
fatty acid binding protein 4, adipocyte  
Fas (TNFRSF6) associated factor 1  
family with sequence similarity 126, member B  
family with sequence similarity 133, member B  
family with sequence similarity 134, member B  
family with sequence similarity 162, member A  
family with sequence similarity 168, member A

family with sequence similarity 21, member A  
family with sequence similarity 40, member B  
family with sequence similarity 46, member A  
family with sequence similarity 48, member A  
family with sequence similarity 8, member A1  
family with sequence similarity 8, member A1  
family with sequence similarity 96, member A  
fatty acyl CoA reductase 1  
phenylalanyl-tRNA synthetase, beta subunit  
FAST kinase domains 2  
Fc fragment of IgE, high affinity I, receptor for; gamma polypeptide  
Fc fragment of IgG, low affinity IIa, receptor (CD32)  
Fc fragment of IgG, low affinity IIb, receptor (CD32)  
Fc fragment of IgG, low affinity IIb, receptor (CD32)  
Fc fragment of IgG, low affinity IIb, receptor (CD32)  
FCH domain only 2  
ferrochelatase (protoporphyrin)  
fermitin family homolog 3 (Drosophila)  
fibrinogen-like 2  
formin homology 2 domain containing 3  
filamin A interacting protein 1  
filamin A interacting protein 1-like  
FK506 binding protein 15, 133kDa  
FK506 binding protein 1A, 12kDa  
FK506 binding protein 9, 63 kDa  
folliculin  
fms-related tyrosine kinase 1 (vascular endothelial growth factor/vascular permeability)  
formin binding protein 1-like  
fibronectin type III domain containing 3A  
fibronectin type III domain containing 3B  
folliculin interacting protein 1  
farnesyltransferase, CAAX box, alpha  
forkhead box N2  
forkhead box N3  
forkhead box P1  
FERM domain containing 4B  
fibroblast growth factor receptor substrate 2  
FRY-like  
ferritin, heavy polypeptide 1  
ferritin, light polypeptide  
ferritin, light polypeptide  
far upstream element (FUSE) binding protein 1  
fucosidase, alpha-L- 2, plasma  
FUN14 domain containing 2  
FYN oncogene related to SRC, FGR, YES  
frizzled homolog 4 (Drosophila)  
GTPase activating protein (SH3 domain) binding protein 1  
GABA(A) receptor-associated protein  
galactosylceramidase  
UDP-N-acetyl-alpha-D-galactosamine:polypeptide N-acetylgalactosaminyltransferase 2  
galanin receptor 1

glyceraldehyde-3-phosphate dehydrogenase  
GTPase activating Rap/RanGAP domain-like 1  
growth arrest-specific 6  
glucan (1,4- $\alpha$ -), branching enzyme 1  
guanylate binding protein family, member 6  
GRINL1A complex locus  
guanine deaminase  
guanine deaminase  
GDP dissociation inhibitor 2  
GDP dissociation inhibitor 2  
GDP dissociation inhibitor 2  
GDP dissociation inhibitor 2  
glucose-fructose oxidoreductase domain containing 1  
geranylgeranyl diphosphate synthase 1  
GRB10 interacting GYF protein 2  
GTPase, IMAP family member 4  
glutaredoxin (thioltransferase)  
glutaredoxin (thioltransferase)  
glutaredoxin 3  
glycosyltransferase 8 domain containing 1  
glycolipid transfer protein domain containing 1  
glutamate-ammonia ligase (glutamine synthetase)  
glyoxylate reductase 1 homolog (Arabidopsis)  
predicted gene 11428  
predicted gene 13295  
predicted gene 5081  
guanine nucleotide binding protein (G protein), alpha inhibiting activity polypeptide 2  
guanine nucleotide binding protein (G protein), q polypeptide  
guanine nucleotide binding protein-like 3 (nucleolar)  
glucosamine (N-acetyl)-6-sulfatase  
glucosamine (N-acetyl)-6-sulfatase  
golgi autoantigen, golgin subfamily a, 4  
golgi autoantigen, golgin subfamily a, 5  
golgi phosphoprotein 3 (coat-protein)  
G patch domain containing 8  
glycerol-3-phosphate dehydrogenase 1-like  
glucose phosphate isomerase  
glucose phosphate isomerase  
glucose phosphate isomerase  
G protein-coupled receptor 146  
glutathione peroxidase 1  
G-rich RNA sequence binding factor 1  
general transcription factor IIB  
glycogenin 1  
glycogenin 1  
H3 histone, family 3C  
histidyl-tRNA synthetase  
hepatitis B virus x interacting protein  
ribosomal protein L36a pseudogene 8  
HEAT repeat containing 5A  
headcase homolog (Drosophila)

helicase with zinc finger  
hect domain and RLD 2  
hexosaminidase A (alpha polypeptide)  
hexosaminidase B (beta polypeptide)  
hemochromatosis  
hemochromatosis  
hippocampus abundant transcript-like 1  
hypoxia inducible factor 1, alpha subunit (basic helix-loop-helix transcription factor)  
histidine triad nucleotide binding protein 1  
histidine triad nucleotide binding protein 1  
histidine acid phosphatase domain containing 2A  
histone cluster 1, H1c  
histone cluster 1, H2bi  
histone cluster 3, H2a  
human immunodeficiency virus type I enhancer binding protein 1  
hexokinase 1  
hexokinase 1  
high-mobility group 20A  
heterogeneous nuclear ribonucleoprotein A3  
heterogeneous nuclear ribonucleoprotein C (C1/C2)  
heterogeneous nuclear ribonucleoprotein F  
heterogeneous nuclear ribonucleoprotein F  
heterogeneous nuclear ribonucleoprotein H1 (H)  
heterogeneous nuclear ribonucleoprotein H1 (H)  
heterogeneous nuclear ribonucleoprotein H2 (H')  
heterogeneous nuclear ribonucleoprotein K  
heterogeneous nuclear ribonucleoprotein R  
heterogeneous nuclear ribonucleoprotein L-like  
homer homolog 1 (Drosophila)  
hydroxysteroid (17-beta) dehydrogenase 10  
hydroxysteroid (17-beta) dehydrogenase 10  
hydroxysteroid (17-beta) dehydrogenase 12  
hydroxysteroid (17-beta) dehydrogenase 4  
heat shock protein 90kDa alpha (cytosolic), class A member 1  
heat shock protein 90kDa alpha (cytosolic), class A member 1  
heat shock protein 90kDa beta (Grp94), member 1  
heat shock protein 70kDa family, member 13  
galectin-related protein  
galectin-related protein  
heat shock 10kDa protein 1 (chaperonin 10)  
5-hydroxytryptamine (serotonin) receptor 3B  
isocitrate dehydrogenase 1 (NADP+), soluble  
iduronate 2-sulfatase  
interferon, gamma-inducible protein 16  
interferon activated gene 203  
interferon activated gene 203  
interferon, alpha-inducible protein 27-like 2  
interferon-induced protein 35  
interferon-induced protein 35  
interferon induced transmembrane protein 2 (1-8D)  
interferon induced transmembrane protein 3 (1-8U)



insulin-like growth factor 1 receptor  
IKAROS family zinc finger 5 (Pegasus)  
interleukin 10 receptor, beta  
interleukin 13 receptor, alpha 1  
interleukin 1 receptor-like 1  
interleukin 33  
IMP1 inner mitochondrial membrane peptidase-like (*S. cerevisiae*)  
IMP3, U3 small nucleolar ribonucleoprotein, homolog (yeast)  
inositol monophosphatase domain containing 1  
INO80 complex subunit D  
inositol polyphosphate-5-phosphatase, 40kDa  
insulin receptor  
integrator complex subunit 4  
inositol hexakisphosphate kinase 1  
importin 4  
importin 5  
IQ motif containing GTPase activating protein 1  
IQ motif containing GTPase activating protein 1  
interleukin-1 receptor-associated kinase 3  
interferon regulatory factor 3  
insulin receptor substrate 1  
iron-sulfur cluster scaffold homolog (*E. coli*)  
integrin alpha FG-GAP repeat containing 1  
integrin, alpha V (vitronectin receptor, alpha polypeptide, antigen CD51)  
integrin, beta 5  
influenza virus NS1A binding protein  
IWS1 homolog (*S. cerevisiae*)  
IWS1 homolog (*S. cerevisiae*)  
Janus kinase 1  
junctional adhesion molecule 2  
jumonji domain containing 1C  
junction mediating and regulatory protein, p53 cofactor  
kelch repeat and BTB (POZ) domain containing 3  
potassium channel modulatory factor 1  
potassium channel tetramerisation domain containing 6  
lysine (K)-specific demethylase 3A  
KH domain containing, RNA binding, signal transduction associated 1  
KH domain containing, RNA binding, signal transduction associated 1  
KH domain containing, RNA binding, signal transduction associated 1  
KIAA0774  
KIAA0947  
KIAA1012  
KIAA1430  
KIAA1462  
KIAA1737  
KIAA2013  
kinesin family member 1C  
kinesin family member 5B  
kinesin family member 5B  
kinesin family member 5B

kelch domain containing 9  
kelch-like 13 (Drosophila)  
kelch-like 17 (Drosophila)  
kelch-like 2, Mayven (Drosophila)  
kelch-like 7 (Drosophila)  
kelch-like 9 (Drosophila)  
karyopherin (importin) beta 1  
lysosomal-associated membrane protein 2  
lysosomal-associated membrane protein 2  
lysosomal protein transmembrane 4 beta  
La ribonucleoprotein domain family, member 2  
lymphocyte cytosolic protein 1 (L-plastin)  
leukemia inhibitory factor receptor alpha  
leukocyte immunoglobulin-like receptor, subfamily B (with TM and ITIM domains), member 4  
LIM domains containing 1  
LIM domains containing 1  
leucyl/cystinyl aminopeptidase  
hypothetical protein LOC100046468  
similar to BKLF  
similar to polycomb group ring finger 5  
similar to hCG23490  
hypothetical LOC152217  
ribosomal protein L10 pseudogene 16  
ribosomal protein L10 pseudogene 16  
ribosomal protein L13 pseudogene 12  
ribosomal protein L13 pseudogene 12  
double C2, gamma pseudogene  
similar to CG32736-PA  
similar to nuclear DNA-binding protein  
ribosomal protein L15 pseudogene 3  
similar to S-phase kinase-associated protein 1A (p19A)  
hypothetical LOC729505  
lipoprotein lipase  
leucine rich repeat containing 40  
leucine rich repeat containing 58  
leucine rich repeat containing 59  
leucine rich repeat (in FLII) interacting protein 1  
LSM3 homolog, U6 small nuclear RNA associated (S. cerevisiae)  
LTV1 homolog (S. cerevisiae)  
LUC7-like 2 (S. cerevisiae)  
LUC7-like 2 (S. cerevisiae)  
lymphocyte antigen 6 complex, locus A  
lymphocyte antigen 6 complex, locus C1  
lymphocyte antigen 6 complex, locus E  
lysophospholipase I  
LYR motif containing 2  
LysM, putative peptidoglycan-binding, domain containing 3  
LysM, putative peptidoglycan-binding, domain containing 3  
lymphatic vessel endothelial hyaluronan receptor 1  
lysozyme (renal amyloidosis)

MACRO domain containing 2  
v-maf musculoaponeurotic fibrosarcoma oncogene homolog G (avian)  
metastasis associated lung adenocarcinoma transcript 1 (non-protein coding)  
mannosidase, alpha, class 1A, member 1  
mannosidase, alpha, class 2A, member 1  
microtubule-associated protein 1 light chain 3 beta  
microtubule-associated protein 1 light chain 3 beta  
microtubule-associated protein 1 light chain 3 beta  
mitogen-activated protein kinase kinase kinase 1  
mitogen-activated protein kinase 1  
mitogen-activated protein kinase 10  
mitogen-activated protein kinase-activated protein kinase 2  
methionine adenosyltransferase II, alpha  
matrin 3  
matrin 3  
mitochondrial antiviral signaling protein  
muscleblind-like 2 (Drosophila)  
methylcrotonoyl-Coenzyme A carboxylase 1 (alpha)  
myeloid cell leukemia sequence 1 (BCL2-related)  
myeloid cell leukemia sequence 1 (BCL2-related)  
myeloid cell leukemia sequence 1 (BCL2-related)  
malate dehydrogenase 1, NAD (soluble)  
mitochondrial trans-2-enoyl-CoA reductase  
mediator complex subunit 1  
mediator complex subunit 1  
mediator complex subunit 13-like  
mediator complex subunit 8  
methionyl aminopeptidase 2  
mex-3 homolog C (C. elegans)  
microfibrillar-associated protein 1  
mitochondrial fission factor  
macrophage migration inhibitory factor (glycosylation-inhibiting factor)  
MAP kinase interacting serine/threonine kinase 2  
mutL homolog 3 (E. coli)  
myeloid/lymphoid or mixed-lineage leukemia 3  
myeloid/lymphoid or mixed-lineage leukemia 5 (trithorax homolog, Drosophila)  
MLX interacting protein-like  
MAX binding protein  
mortality factor 4 like 1  
mortality factor 4 like 2  
mortality factor 4 like 2  
mortality factor 4 like 2  
motile sperm domain containing 2  
Mov10l1, Moloney leukemia virus 10-like 1, homolog (mouse)  
M-phase phosphoprotein 9  
mannose receptor, C type 1  
mitochondrial ribosomal protein L11  
mitochondrial ribosomal protein L13  
mitochondrial ribosomal protein L15  
mitochondrial ribosomal protein L15

mitochondrial ribosomal protein L41  
mitochondrial ribosomal protein L42  
mitochondrial ribosomal protein S15  
mitochondrial ribosomal protein S17  
mitochondrial ribosomal protein S22  
mitochondrial ribosomal protein S24  
mitochondrial ribosomal protein S25  
mitochondrial ribosomal protein S25  
mitochondrial ribosomal protein S30  
mitochondrial ribosomal protein S36  
membrane-spanning 4-domains, subfamily A, member 6A  
musashi homolog 2 (Drosophila)  
musashi homolog 2 (Drosophila)  
musashi homolog 2 (Drosophila)  
male-specific lethal 2 homolog (Drosophila)  
male-specific lethal 3 homolog (Drosophila)  
mature T-cell proliferation 1  
methylenetetrahydrofolate dehydrogenase (NADP+ dependent) 2-like  
myotubularin related protein 6  
5-methyltetrahydrofolate-homocysteine methyltransferase reductase  
MAX interactor 1  
MYC binding protein 2  
myosin, light chain 3, alkali; ventricular, skeletal, slow  
myosin regulatory light chain interacting protein  
myomesin (M-protein) 2, 165kDa  
myomesin (M-protein) 2, 165kDa  
myomesin (M-protein) 2, 165kDa  
myozenin 2  
NGFI-A binding protein 1 (EGR1 binding protein 1)  
nascent polypeptide-associated complex alpha subunit  
nascent polypeptide-associated complex alpha subunit  
NAD kinase  
nuclear assembly factor 1 homolog (*S. cerevisiae*)  
nucleosome assembly protein 1-like 1  
NMDA receptor regulated 1  
N-acetyltransferase 5 (GCN5-related, putative)  
neurobeachin  
non-SMC condensin II complex, subunit H2  
neutral cholesterol ester hydrolase 1  
nuclear receptor coactivator 2  
nudE nuclear distribution gene E homolog (*A. nidulans*)-like 1  
Nedd4 family interacting protein 1  
Nedd4 family interacting protein 2  
N-deacetylase/N-sulfotransferase (heparan glucosaminy) 1  
NADH dehydrogenase (ubiquinone) 1 alpha subcomplex, 12  
NADH dehydrogenase (ubiquinone) 1 alpha subcomplex, 12  
NADH dehydrogenase (ubiquinone) 1 alpha subcomplex, 12  
NADH dehydrogenase (ubiquinone) 1 beta subcomplex, 6, 17kDa  
NADH dehydrogenase (ubiquinone) Fe-S protein 7, 20kDa (NADH-coenzyme Q reductase)  
NADH dehydrogenase (ubiquinone) Fe-S protein 7, 20kDa (NADH-coenzyme Q reductase)

neuralized homolog 4 (*Drosophila*)  
nexilin (F actin binding protein)  
nuclear factor of activated T-cells, cytoplasmic, calcineurin-dependent 1  
nuclear factor of activated T-cells, cytoplasmic, calcineurin-dependent 2 interacting protein  
nuclear factor of kappa light polypeptide gene enhancer in B-cells inhibitor, alpha  
nuclear factor of kappa light polypeptide gene enhancer in B-cells inhibitor, alpha  
neuroguidin, EIF4E binding protein  
NHL repeat containing 3  
NIF3 NGG1 interacting factor 3-like 1 (*S. pombe*)  
nuclear import 7 homolog (*S. cerevisiae*)  
nischarin  
nischarin  
nucleoside phosphorylase  
Niemann-Pick disease, type C2  
nuclear receptor subfamily 1, group H, member 3  
nuclear receptor subfamily 2, group C, member 2  
nuclear receptor subfamily 4, group A, member 3  
5'-nucleotidase, cytosolic III  
netrin 1  
nuclear casein kinase and cyclin-dependent kinase substrate 1  
nudix (nucleoside diphosphate linked moiety X)-type motif 21  
nucleoporin 160kDa  
nucleoporin 54kDa  
nucleoporin like 1  
nuclear undecaprenyl pyrophosphate synthase 1 homolog (*S. cerevisiae*)  
nuclear undecaprenyl pyrophosphate synthase 1 homolog (*S. cerevisiae*)  
nuclear transport factor 2  
obscurin, cytoskeletal calmodulin and titin-interacting RhoGEF  
ornithine decarboxylase 1  
optineurin  
oxysterol binding protein-like 1A  
oxysterol binding protein-like 9  
oncostatin M receptor  
oligosaccharyltransferase complex subunit  
OTU domain containing 6B  
pyrimidinergic receptor P2Y, G-protein coupled, 6  
poly(A) binding protein, cytoplasmic 4 (inducible form)  
phosphoribosylaminoimidazole carboxylase, phosphoribosylaminoimidazole  
phosphoribosylaminoimidazole carboxylase, phosphoribosylaminoimidazole  
PAK1 interacting protein 1  
PAP associated domain containing 5  
POZ (BTB) and AT hook containing zinc finger 1  
pre-B-cell leukemia homeobox 3  
protocadherin 7  
protocadherin 7  
PEST proteolytic signal containing nuclear protein  
procollagen C-endopeptidase enhancer  
programmed cell death 10  
programmed cell death 2  
programmed cell death 5

3-phosphoinositide dependent protein kinase-1  
p53 and DNA-damage regulated 1  
prenyl (decaprenyl) diphosphate synthase, subunit 1  
pyridoxal (pyridoxine, vitamin B6) kinase  
PDZ domain containing 8  
PERP, TP53 apoptosis effector  
prefoldin subunit 1  
prefoldin subunit 5  
prefoldin subunit 6  
6-phosphofructo-2-kinase/fructose-2,6-biphosphatase 2  
phosphoglycerate kinase 1  
progesterone receptor membrane component 2  
phosphatase and actin regulator 4  
prohibitin  
PHD finger protein 12  
PHD finger protein 20  
PHD finger protein 20  
PHD finger protein 3  
phosphatidylinositol binding clathrin assembly protein  
phosphotyrosine interaction domain containing 1  
phosphatidylinositol glycan anchor biosynthesis, class O  
phosphoinositide-3-kinase, class 2, alpha polypeptide  
phosphoinositide-3-kinase, catalytic, alpha polypeptide  
phosphoinositide-3-kinase, catalytic, alpha polypeptide  
phosphatidylinositol-4-phosphate 5-kinase, type I, beta  
phosphatidylinositol transfer protein, cytoplasmic 1  
praja ring finger 2  
praja ring finger 2  
polycystic kidney disease 1 (autosomal dominant)  
plakophilin 2  
phospholipase C, beta 4  
phospholipase C, beta 4  
phospholipase C, delta 3  
phospholipase C, epsilon 1  
perilipin 3  
proteolipid protein 2 (colonic epithelium-enriched)  
proteolipid protein 2 (colonic epithelium-enriched)  
phospholipid scramblase 2  
phospholipid transfer protein  
patatin-like phospholipase domain containing 8  
protein O-fucosyltransferase 1  
polymerase (DNA directed), delta 2, regulatory subunit 50kDa  
polymerase (RNA) I polypeptide D, 16kDa  
peroxisome proliferator-activated receptor alpha  
peroxisome proliferator-activated receptor gamma, coactivator 1 alpha  
protein tyrosine phosphatase, receptor type, f polypeptide (PTPRF), interacting protein (liprin), alpha 1

protein phosphatase 1, catalytic subunit, beta isoform  
protein phosphatase 1, catalytic subunit, beta isoform  
protein phosphatase 1, catalytic subunit, gamma isoform  
protein phosphatase 1, regulatory (inhibitor) subunit 11  
protein phosphatase 1, regulatory (inhibitor) subunit 11  
protein phosphatase 1, regulatory (inhibitor) subunit 12A  
protein phosphatase 1, regulatory (inhibitor) subunit 15A  
protein phosphatase 2 (formerly 2A), regulatory subunit A, alpha isoform  
protein phosphatase 2 (formerly 2A), regulatory subunit A, alpha isoform  
protein phosphatase 2 (formerly 2A), regulatory subunit A, alpha isoform  
protein phosphatase 2, regulatory subunit B, delta isoform  
protein phosphatase 3 (formerly 2B), catalytic subunit, alpha isoform  
PPPDE peptidase domain containing 2  
prolylcarboxypeptidase (angiotensinase C)  
peroxiredoxin 1  
peroxiredoxin 1  
peroxiredoxin 1  
peroxiredoxin 2  
peroxiredoxin 4  
PRELI domain containing 1  
prolyl endopeptidase-like  
protein kinase, cAMP-dependent, catalytic, beta  
protein kinase D1  
protein arginine methyltransferase 6  
proline synthetase co-transcribed homolog (bacterial)  
PRP40 pre-mRNA processing factor 40 homolog A (*S. cerevisiae*)  
PRP4 pre-mRNA processing factor 4 homolog B (yeast)  
PRP4 pre-mRNA processing factor 4 homolog B (yeast)  
PRP4 pre-mRNA processing factor 4 homolog B (yeast)  
proline rich Gla (G-carboxyglutamic acid) 1  
presenilin enhancer 2 homolog (*C. elegans*)  
proteasome (prosome, macropain) subunit, alpha type, 6  
proteasome (prosome, macropain) subunit, alpha type, 6  
proteasome (prosome, macropain) subunit, beta type, 4  
proteasome (prosome, macropain) 26S subunit, ATPase, 2  
proteasome (prosome, macropain) 26S subunit, ATPase, 4  
proteasome (prosome, macropain) 26S subunit, non-ATPase, 6  
prostaglandin E synthase 3 (cytosolic)  
prostaglandin E synthase 3 (cytosolic)  
prostaglandin reductase 2  
protein tyrosine phosphatase type IVA, member 1  
protein tyrosine phosphatase type IVA, member 1  
protein tyrosine phosphatase-like (proline instead of catalytic arginine), member A  
protein tyrosine phosphatase, non-receptor type 12  
protein tyrosine phosphatase, non-receptor type 2  
protein tyrosine phosphatase, receptor type, C  
protein tyrosine phosphatase, receptor type, G  
pituitary tumor-transforming 1 interacting protein  
poly-U binding splicing factor 60KDa  
poliovirus receptor

serine/threonine-protein kinase QSK  
serine/threonine-protein kinase QSK  
serine/threonine-protein kinase QSK  
RAB11 family interacting protein 2 (class I)  
RAB11 family interacting protein 5 (class I)  
RAB14, member RAS oncogene family  
RAB28, member RAS oncogene family  
rabaptin, RAB GTPase binding effector protein 1  
ras-related C3 botulinum toxin substrate 1 (rho family, small GTP binding protein Rac1)  
ralA binding protein 1  
RAN, member RAS oncogene family  
RAN, member RAS oncogene family  
RAN binding protein 2  
RAP1A, member of RAS oncogene family  
Rap guanine nucleotide exchange factor (GEF) 4  
Rap guanine nucleotide exchange factor (GEF) 6  
Ras association (RalGDS/AF-6) and pleckstrin homology domains 1  
Ras association (RalGDS/AF-6) and pleckstrin homology domains 1  
arginyl-tRNA synthetase  
RAS p21 protein activator 3  
retinoblastoma 1  
RB1-inducible coiled-coil 1  
RB1-inducible coiled-coil 1  
retinoblastoma binding protein 4  
retinoblastoma binding protein 4  
retinoblastoma binding protein 7  
RNA binding motif protein 16  
RNA binding motif protein 17  
RNA binding motif protein 24  
RNA binding motif protein 25  
RNA binding motif protein 25  
RNA binding motif (RNP1, RRM) protein 3  
RNA binding motif protein 5  
RNA binding motif, single stranded interacting protein  
RNA binding motif protein, X-linked  
radixin  
radixin  
receptor accessory protein 3  
receptor accessory protein 5  
RALBP1 associated Eps domain containing 1  
ring finger and FYVE-like domain containing 1  
riboflavin kinase  
ras homolog gene family, member A  
Rho-related BTB domain containing 3  
Rho-related BTB domain containing 3  
Rab interacting lysosomal protein-like 1  
Ras-like without CAAX 1  
ribonuclease T2  
ring finger protein 114



ring finger protein 144B  
ring finger protein 19B  
ring finger protein 19B  
RNA binding protein S1, serine-rich domain  
RNA binding protein S1, serine-rich domain  
Rho-associated, coiled-coil containing protein kinase 1  
Rho-associated, coiled-coil containing protein kinase 1  
Rho-associated, coiled-coil containing protein kinase 2  
ribosomal protein L10A  
ribosomal protein L12  
ribosomal protein L12  
ribosomal protein L13a  
ribosomal protein L17  
ribosomal protein L22-like 1  
ribosomal protein L23a  
ribosomal protein L23a  
ribosomal protein L24  
ribosomal protein L27  
ribosomal protein L29  
ribosomal protein L3  
ribosomal protein L30  
ribosomal protein L31  
ribosomal protein L35  
ribosomal protein L35  
ribosomal protein L39  
ribosomal protein L5  
ribosomal protein L6  
ribosomal protein L7  
ribosomal protein L7  
ribosomal protein L9  
ribosomal protein, large, P0  
regulation of nuclear pre-mRNA domain containing 1A  
ribosomal protein S10  
ribosomal protein S10  
ribosomal protein S10  
ribosomal protein S11  
ribosomal protein S12  
ribosomal protein S13  
ribosomal protein S15A  
ribosomal protein S16  
ribosomal protein S16  
ribosomal protein S20  
ribosomal protein S20  
ribosomal protein S21  
ribosomal protein S24  
ribosomal protein S24

ribosomal protein S26  
ribosomal protein S27A  
ribosomal protein S28  
ribosomal protein S29  
ribosomal protein S4, X-linked  
ribosomal protein S5  
ribosomal protein S6  
ribosomal protein S6 kinase, 70kDa, polypeptide 1  
ribosomal protein S9  
Ras-related GTP binding D  
RRS1 ribosome biogenesis regulator homolog (*S. cerevisiae*)  
round spermatid basic protein 1  
reticulon 3  
RWD domain containing 1  
RWD domain containing 4A  
S100 calcium binding protein A10  
S100 calcium binding protein A11  
S100 calcium binding protein A8  
S100 calcium binding protein A9  
SAC1 suppressor of actin mutations 1-like (yeast)  
Sin3A-associated protein, 30kDa  
SAP domain containing ribonucleoprotein  
SET binding factor 2  
SH3-binding domain kinase 1  
strawberry notch homolog 1 (*Drosophila*)  
scavenger receptor class A, member 5 (putative)  
schwannomin interacting protein 1  
sodium channel, voltage-gated, type VII, alpha  
short coiled-coil protein  
sterol carrier protein 2  
serine carboxypeptidase 1  
secernin 1  
serologically defined colon cancer antigen 1  
Sec61 gamma subunit  
SEC62 homolog (*S. cerevisiae*)  
SEC63 homolog (*S. cerevisiae*)  
selenoprotein S  
selenoprotein S  
selenoprotein W, 1  
SERPINE1 mRNA binding protein 1  
small EDRK-rich factor 2  
serine incorporator 1  
serine incorporator 3  
serine incorporator 3

SET nuclear oncogene  
SET domain containing 6  
splicing factor 1  
splicing factor 3b, subunit 1, 155kDa  
splicing factor 3B, 14 kDa subunit  
splicing factor 3b, subunit 2, 145kDa  
splicing factor 3b, subunit 3, 130kDa  
secreted frizzled-related protein 1  
secreted frizzled-related protein 1  
splicing factor, arginine/serine-rich 11  
splicing factor, arginine/serine-rich 18  
serum/glucocorticoid regulated kinase 1  
shugoshin-like 1 (*S. pombe*)  
SH3 domain binding glutamic acid-rich protein like  
SH3 domain binding glutamic acid-rich protein like  
SH3 domain binding glutamic acid-rich protein like 3  
SH3-domain GRB2-like endophilin B1  
SH3-domain GRB2-like endophilin B1  
shisa homolog 5 (*Xenopus laevis*)  
suppressor of IKBKE 1  
signal-induced proliferation-associated 1 like 2  
v-ski sarcoma viral oncogene homolog (avian)  
solute carrier family 16, member 4 (monocarboxylic acid transporter 5)  
solute carrier family 20 (phosphate transporter), member 1  
solute carrier family 25, member 28  
solute carrier family 25, member 30  
solute carrier family 25, member 36  
solute carrier family 25, member 39  
solute carrier family 25 (mitochondrial carrier; adenine nucleotide translocator), member 4  
solute carrier family 25 (mitochondrial carrier; adenine nucleotide translocator), member 6  
solute carrier family 25 (mitochondrial carrier; adenine nucleotide translocator), member 6  
solute carrier family 25 (mitochondrial carrier; adenine nucleotide translocator), member 6  
solute carrier family 2 (facilitated glucose transporter), member 12  
solute carrier family 2 (facilitated glucose transporter), member 9  
solute carrier family 3 (activators of dibasic and neutral amino acid transport), member 2  
solute carrier family 6 (neurotransmitter transporter, taurine), member 6  
solute carrier family 6 (neurotransmitter transporter, taurine), member 6  
solute carrier family 6 (neurotransmitter transporter, creatine), member 8  
solute carrier organic anion transporter family, member 2B1  
solute carrier organic anion transporter family, member 3A1  
SMAD family member 4  
SMAD family member 7  
SMG1 homolog, phosphatidylinositol 3-kinase-related kinase (*C. elegans*)  
survival motor neuron domain containing 1  
sphingomyelin phosphodiesterase 1, acid lysosomal  
single-strand-selective monofunctional uracil-DNA glycosylase 1  
SMAD specific E3 ubiquitin protein ligase 2  
staphylococcal nuclease and tudor domain containing 1  
small nucleolar RNA host gene (non-protein coding) 6

small nuclear ribonucleoprotein polypeptide A'  
sorting nexin 18  
suppressor of cytokine signaling 2  
suppressor of cytokine signaling 3  
suppressor of cytokine signaling 6  
superoxide dismutase 2, mitochondrial  
SON DNA binding protein  
SON DNA binding protein  
sorbin and SH3 domain containing 1  
sorbin and SH3 domain containing 1  
sorbitol dehydrogenase  
sorbitol dehydrogenase  
son of sevenless homolog 2 (Drosophila)  
SRY (sex determining region Y)-box 17  
Sp1 transcription factor  
sperm associated antigen 9  
SPEG complex locus  
spinster homolog 2 (Drosophila)  
sprouty-related, EVH1 domain containing 2  
serine palmitoyltransferase, long chain base subunit 2  
U2-associated SR140 protein  
steroid receptor RNA activator 1  
SLIT-ROBO Rho GTPase activating protein 2  
serglycin  
signal recognition particle 14kDa (homologous Alu RNA binding protein)  
signal recognition particle 14kDa (homologous Alu RNA binding protein)  
signal recognition particle 19kDa  
sulfiredoxin 1 homolog (S. cerevisiae)  
synovial sarcoma translocation gene on chromosome 18-like 2  
single-stranded DNA binding protein 1  
slingshot homolog 3 (Drosophila)  
signal sequence receptor, gamma (translocon-associated protein gamma)  
signal sequence receptor, delta (translocon-associated protein delta)  
suppression of tumorigenicity 13 (colon carcinoma) (Hsp70 interacting protein)  
ST8 alpha-N-acetyl-neuraminide alpha-2,8-sialyltransferase 6  
stabilin 1  
stromal antigen 2  
signal transducer and activator of transcription 3 (acute-phase response factor)  
signal transducer and activator of transcription 3 (acute-phase response factor)  
serine/threonine kinase 3 (STE20 homolog, yeast)  
serine threonine kinase 39 (STE20/SPS1 homolog, yeast)  
serine threonine kinase 39 (STE20/SPS1 homolog, yeast)  
striatin, calmodulin binding protein 3  
STT3, subunit of the oligosaccharyltransferase complex, homolog B (S. cerevisiae)  
SMT3 suppressor of mif two 3 homolog 2 (yeast)  
synapse associated protein 1, SAP47 homolog (Drosophila)  
symplekin  
synaptotagmin binding, cytoplasmic RNA interacting protein  
synaptotagmin binding, cytoplasmic RNA interacting protein

TAF1 RNA polymerase II, TATA box binding protein (TBP)-associated factor, 250kDa  
TAF10 RNA polymerase II, TATA box binding protein (TBP)-associated factor, 30kDa  
TAF9 RNA polymerase II, TATA box binding protein (TBP)-associated factor, 32kDa  
TAF9 RNA polymerase II, TATA box binding protein (TBP)-associated factor, 32kDa  
TAF9 RNA polymerase II, TATA box binding protein (TBP)-associated factor, 32kDa  
TatD DNase domain containing 1  
TBC1 domain family, member 15  
tubulin folding cofactor A  
TANK-binding kinase 1  
TBP-like 1  
T-box 20  
aldo-keto reductase family 1, member B10-like  
transcription elongation factor B (SIII), polypeptide 1 (15kDa, elongin C)  
transcription elongation factor B (SIII), polypeptide 2 (18kDa, elongin B)  
transcription elongation factor B (SIII), polypeptide 3 (110kDa, elongin A)  
t-complex 11 (mouse)-like 2  
trans-2,3-enoyl-CoA reductase-like  
testis expressed 261  
tissue factor pathway inhibitor (lipoprotein-associated coagulation inhibitor)  
tissue factor pathway inhibitor (lipoprotein-associated coagulation inhibitor)  
transforming growth factor, beta receptor II (70/80kDa)  
transglutaminase 2 (C polypeptide, protein-glutamine-gamma-glutamyltransferase)  
transglutaminase 2 (C polypeptide, protein-glutamine-gamma-glutamyltransferase)  
transglutaminase 2 (C polypeptide, protein-glutamine-gamma-glutamyltransferase)  
trimethylguanosine synthase homolog (*S. cerevisiae*)  
trimethylguanosine synthase homolog (*S. cerevisiae*)  
thrombomodulin  
TIA1 cytotoxic granule-associated RNA binding protein  
TIA1 cytotoxic granule-associated RNA binding protein  
TRAF-interacting protein with forkhead-associated domain, family member B  
translocase of inner mitochondrial membrane 10 homolog (yeast)  
TCDD-inducible poly(ADP-ribose) polymerase  
TM2 domain containing 2  
TM2 domain containing 2  
transmembrane BAX inhibitor motif containing 1  
transmembrane and coiled-coil domain family 3  
transmembrane and coiled-coil domains 1  
transmembrane emp24-like trafficking protein 10 (yeast)  
transmembrane emp24 domain trafficking protein 2  
transmembrane emp24 protein transport domain containing 3  
transmembrane emp24 protein transport domain containing 7  
transmembrane protein 100  
transmembrane protein 106B  
transmembrane protein 106B  
transmembrane protein 115  
transmembrane protein 144

transmembrane protein 167A  
transmembrane protein 176A  
transmembrane protein 182  
transmembrane protein 41B  
transmembrane protein 45A  
transmembrane protein 93  
TMEM9 domain family, member B  
transmembrane and tetratricopeptide repeat containing 1  
tankyrase, TRF1-interacting ankyrin-related ADP-ribose polymerase 2  
tankyrase, TRF1-interacting ankyrin-related ADP-ribose polymerase 2  
transportin 1  
trinucleotide repeat containing 6A  
trinucleotide repeat containing 6A  
trinucleotide repeat containing 6A  
trinucleotide repeat containing 6C  
transducer of ERBB2, 1  
translocase of outer mitochondrial membrane 20 homolog (yeast)  
translocase of outer mitochondrial membrane 20 homolog (yeast)  
translocase of outer mitochondrial membrane 20 homolog (yeast)  
translocase of outer mitochondrial membrane 7 homolog (yeast)  
triosephosphate isomerase 1  
tropomyosin 3  
tripeptidyl peptidase I  
translocated promoter region (to activated MET oncogene)  
tumor protein p63 regulated 1-like  
tumor protein, translationally-controlled 1  
TraB domain containing  
trafficking protein particle complex 6B  
tripartite motif-containing 24  
tripartite motif-containing 28  
TRIO and F-actin binding protein  
thyroid hormone receptor interactor 11  
thyroid hormone receptor interactor 12  
TMF1-regulated nuclear protein 1  
TROVE domain family, member 2  
TROVE domain family, member 2  
transient receptor potential cation channel, subfamily M, member 7  
tuberous sclerosis 1  
tetraspanin 31  
tetraspanin 4  
translocator protein (18kDa)  
titin  
tubulin, alpha 1b  
tubulin, alpha 1c  
tubulin, alpha 4a  
tubulin, beta 6  
taurine upregulated gene 1  
tubby like protein 4

ubiquitin A-52 residue ribosomal protein fusion product 1  
ubiquitin A-52 residue ribosomal protein fusion product 1  
ubiquitin C  
ubiquitin-conjugating enzyme E2D 2 (UBC4/5 homolog, yeast)  
ubiquitin-conjugating enzyme E2D 3 (UBC4/5 homolog, yeast)  
ubiquitin-conjugating enzyme E2D 3 (UBC4/5 homolog, yeast)  
ubiquitin-conjugating enzyme E2D 3 (UBC4/5 homolog, yeast)  
ubiquitin-conjugating enzyme E2G 1 (UBC7 homolog, yeast)  
ubiquitination factor E4B (UFD2 homolog, yeast)  
ubiquitin 2  
ubiquitin protein ligase E3 component n-recogin 2  
UBX domain protein 2A  
UDP-glucose dehydrogenase  
UDP-glucose pyrophosphorylase 2  
unc-119 homolog B (*C. elegans*)  
uridine phosphorylase 1  
uroporphyrinogen III synthase  
ubiquitin specific peptidase 1  
ubiquitin specific peptidase 14 (tRNA-guanine transglycosylase)  
ubiquitin specific peptidase 25  
utrophin  
ubiquitously transcribed tetratricopeptide repeat gene, Y-linked  
UV radiation resistance associated gene  
vesicle-associated membrane protein 3 (cellubrevin)  
vesicle-associated membrane protein 4  
VAMP (vesicle-associated membrane protein)-associated protein A, 33kDa  
VAMP (vesicle-associated membrane protein)-associated protein A, 33kDa  
von Hippel-Lindau binding protein 1  
valosin containing protein (p97)/p47 complex interacting protein 1  
vascular endothelial zinc finger 1  
vimentin  
VMA21 vacuolar H<sup>+</sup>-ATPase homolog (*S. cerevisiae*)  
vacuolar protein sorting 26 homolog A (*S. pombe*)  
vacuolar protein sorting 35 homolog (*S. cerevisiae*)  
vacuolar protein sorting 4 homolog A (*S. cerevisiae*)  
von Willebrand factor A domain containing 5A  
von Willebrand factor  
WW domain containing adaptor with coiled-coil  
wings apart-like homolog (*Drosophila*)  
tryptophanyl-tRNA synthetase  
tryptophanyl-tRNA synthetase  
WW domain binding protein 5  
WD repeat and FYVE domain containing 3  
WAS/WASL interacting protein family, member 3

Yip1 domain family, member 4  
Yip1 domain family, member 5  
YTH domain family, member 1  
YTH domain family, member 3  
tyrosine 3-monooxygenase/tryptophan 5-monooxygenase activation protein, beta polypeptide  
tyrosine 3-monooxygenase/tryptophan 5-monooxygenase activation protein, beta polypeptide  
tyrosine 3-monooxygenase/tryptophan 5-monooxygenase activation protein, beta polypeptide  
tyrosine 3-monooxygenase/tryptophan 5-monooxygenase activation protein, theta polypeptide  
zinc finger and BTB domain containing 2  
zinc finger and BTB domain containing 41  
zinc finger CCCH-type containing 10  
zinc finger CCCH-type containing 14  
zinc finger CCCH-type containing 15  
zinc finger, CCHC domain containing 6  
zinc finger, CCHC domain containing 7  
zinc finger, DHHC-type containing 16  
zinc finger, DHHC-type containing 3  
zinc finger, DHHC-type containing 5  
zinc finger E-box binding homeobox 2  
zinc finger, AN1-type domain 5  
zinc finger, C3H1-type containing  
zinc finger protein 161 homolog (mouse)  
zinc finger protein 161 homolog (mouse)  
zinc finger protein 36, C3H type-like 1  
zinc finger protein 422, related sequence 1  
zinc finger protein 809  
zinc finger protein 871  
zinc finger protein 91 homolog (mouse)  
zinc finger RNA binding protein  
zinc finger, FYVE domain containing 21  
zinc fingers and homeoboxes 2  
zinc finger, MIZ-type containing 2  
zinc metallopeptidase (STE24 homolog, *S. cerevisiae*)  
zinc finger, MYM-type 4  
zinc finger, MYM-type 5  
zinc finger protein 124  
zinc finger protein 148  
zinc finger protein 187  
zinc finger protein 266  
zinc finger protein 367  
zinc finger protein 397  
zinc finger protein 526  
zinc finger protein 560



zinc finger, RAN-binding domain containing 1  
 zinc finger, RAN-binding domain containing 2  
 zinc finger (CCCH type), RNA binding motif and serine/arginine rich 1  
 zinc finger, ZZ-type containing 3

## Supp. Table 3 Heart TERT

### Increased 138 probe sets in G4 mice

#### Entrez Gene Name

RIKEN cDNA 2810488G03 gene  
 RIKEN cDNA 4833408G04 gene  
 RIKEN cDNA 4930442G15 gene  
 RIKEN cDNA 4933407I05 gene  
 acetyl-Coenzyme A acyltransferase 2  
 adenosylhomocysteinase-like 1  
 annexin A6  
 amyloid beta (A4) precursor-like protein 2  
 aristaless related homeobox  
 expressed sequence AU020147  
 B-cell CLL/lymphoma 6  
 chromosome 2 open reading frame 82  
 carbonic anhydrase III, muscle specific  
 cAMP responsive element binding protein 3-like 4  
 corticotropin releasing hormone receptor 1  
 DDB1 and CUL4 associated factor 5  
 DEAD (Asp-Glu-Ala-Asp) box polypeptide 51  
 diacylglycerol kinase, eta  
 ubiquitin-conjugating enzyme E2Q (putative) 2 pseudogene  
 engulfment and cell motility 1  
 envoplakin  
 fatty acid binding protein 3, muscle and heart (mammary-derived growth inhibitor)  
 FCH domain only 1  
 ganglioside-induced differentiation-associated protein 1  
 GDP dissociation inhibitor 2  
 glycoprotein A33 (transmembrane)  
 heart and neural crest derivatives expressed 2  
 insulin-degrading enzyme  
 Impact homolog (mouse)  
 inter-alpha (globulin) inhibitor H5  
 leucine-rich repeat LGI family, member 3  
 protein phosphatase 4, regulatory subunit 1-like  
 malic enzyme 1, NADP(+)-dependent, cytosolic  
 musashi homolog 2 (Drosophila)  
 nucleus accumbens associated 1, BEN and BTB (POZ) domain containing  
 nucleus accumbens associated 1, BEN and BTB (POZ) domain containing  
 nudix (nucleoside diphosphate linked moiety X)-type motif 4  
 paired box 8

protamine 2  
proline-rich transmembrane protein 3  
RAD9 homolog B (*S. pombe*)  
RAS protein activator like 3  
RNA binding motif protein 24  
retinitis pigmentosa GTPase regulator interacting protein 1  
scratch homolog 2, zinc finger protein (*Drosophila*)  
SEC14-like 2 (*S. cerevisiae*)  
splicing factor 3a, subunit 2, 66kDa  
solute carrier family 45, member 2  
smoothelin-like 2  
stomatin  
tescalcin  
transferrin receptor (p90, CD71)  
transmembrane protein 19  
tumor necrosis factor receptor superfamily, member 21  
torsin family 1, member B (torsin B)  
trypsin domain containing 1  
vinculin  
vacuolar protein sorting 13 homolog A (*S. cerevisiae*)  
zinc finger protein 36, C3H type-like 2  
zinc finger protein 568  
zinc finger protein 76 (expressed in testis)  
zinc finger and SCAN domain containing 5B  
ubiquitin-conjugating enzyme E2E 3 (UBC4/5 homolog, yeast)  
unconventional SNARE in the ER 1 homolog (*S. cerevisiae*)  
unconventional SNARE in the ER 1 homolog (*S. cerevisiae*)  
upstream transcription factor 2, c-fos interacting  
ubiquitin specific peptidase 53  
vesicle-associated membrane protein 8 (endobrevin)  
vacuolar protein sorting 54 homolog (*S. cerevisiae*)  
vitronectin  
latrophilin 2  
leucine-rich alpha-2-glycoprotein 1  
low density lipoprotein receptor-related protein associated protein 1  
leucine rich repeat containing 42  
LSM8 homolog, U6 small nuclear RNA associated (*S. cerevisiae*)  
lymphotoxin beta receptor (TNFR superfamily, member 3)  
LYR motif containing 4  
membrane associated guanylate kinase, WW and PDZ domain containing 3  
MAK16 homolog (*S. cerevisiae*)  
microtubule-associated protein 1 light chain 3 beta  
mitogen-activated protein kinase kinase kinase 7 interacting protein 2  
mitogen-activated protein kinase kinase kinase kinase 4  
MAP7 domain containing 1  
mediator complex subunit 15  
methyltransferase like 1  
matrix metalloproteinase 14 (membrane-inserted)

metallothionein 1E  
metallothionein 1F  
metadherin  
myotubularin related protein 10  
myosin IC  
myosin IXB  
nucleosome assembly protein 1-like 1  
nucleosome assembly protein 1-like 1  
nucleosome assembly protein 1-like 1  
nucleolin  
nuclear factor of kappa light polypeptide gene enhancer in B-cells inhibitor, zeta  
NHP2 ribonucleoprotein homolog (yeast)  
NHP2 non-histone chromosome protein 2-like 1 (*S. cerevisiae*)  
NmrA-like family domain containing 1  
Notch homolog 4 (*Drosophila*)  
5'-nucleotidase, cytosolic II  
neurotrophin 3  
nucleotide binding protein 1 (MinD homolog, *E. coli*)  
nucleotide binding protein 1 (MinD homolog, *E. coli*)  
nudix (nucleoside diphosphate linked moiety X)-type motif 18  
nudix (nucleoside diphosphate linked moiety X)-type motif 4  
orosomuroid 1  
orosomuroid 2  
oxysterol binding protein-like 9  
ovarian tumor suppressor candidate 2  
poly (ADP-ribose) polymerase 2  
poly(rC) binding protein 2  
poly(rC) binding protein 4  
polycomb group ring finger 6  
erythrocyte membrane protein band 4.1 (elliptycytosis 1, RH-linked)  
ERBB receptor feedback inhibitor 1  
coagulation factor XI  
ficolin (collagen/fibrinogen domain containing lectin) 2 (hucolin)  
fetuin B  
fibroblast growth factor receptor 1  
fibronectin type III domain containing 3B  
GDNF family receptor alpha 1

# Supp table 4

## mTR liver decreased 1393 probe sets

Entrez Gene Name

RIKEN cDNA 0610008F07 gene  
RIKEN cDNA 0610012H03 gene  
RIKEN cDNA 1110001A16 gene  
RIKEN cDNA 1500017E21 gene  
RIKEN cDNA 1810008I18 gene  
RIKEN cDNA 1810059H22 gene  
RIKEN cDNA 2210023G05 gene  
RIKEN cDNA 2310016E02 gene  
RIKEN cDNA 2410003K15 gene  
RIKEN cDNA 2810007J24 gene  
RIKEN cDNA 2810410P21 gene  
RIKEN cDNA 2810416A17 gene  
RIKEN cDNA 2900053A13 gene  
RIKEN cDNA 2900057C01 gene  
RIKEN cDNA 4632419I22 gene  
RIKEN cDNA 4930563F15 gene  
RIKEN cDNA 4933407A17 gene  
RIKEN cDNA 4933412L11 gene  
RIKEN cDNA 4933438B17 gene  
RIKEN cDNA 5430439M09 gene  
RIKEN cDNA 5730407I07 gene  
RIKEN cDNA 6030442K20 gene  
RIKEN cDNA 9030619P08 gene  
RIKEN cDNA 9130409I23 gene  
RIKEN cDNA 9530025L08 gene  
hypothetical protein 9530028C05  
RIKEN cDNA A230067G21 gene  
RIKEN cDNA A530058N18 gene  
expressed sequence AA619741  
acetoacetyl-CoA synthetase  
acetoacetyl-CoA synthetase  
arylacetamide deacetylase (esterase)  
aminoadipate aminotransferase  
4-aminobutyrate aminotransferase  
ATP-binding cassette, sub-family A (ABC1), member 8  
ATP-binding cassette, sub-family A (ABC1), member 8a  
ATP-binding cassette, sub-family B (MDR/TAP), member 11  
ATP-binding cassette, sub-family C (CFTR/MRP), member 3  
ATP-binding cassette, sub-family C (CFTR/MRP), member 6  
ATP-binding cassette, sub-family D (ALD), member 1  
abhydrolase domain containing 4  
abhydrolase domain containing 6  
acetyl-Coenzyme A acyltransferase 1  
acetyl-Coenzyme A acyltransferase 1  
acetyl-Coenzyme A acyltransferase 1B  
acetyl-Coenzyme A acyltransferase 2  
acetyl-Coenzyme A carboxylase beta  
acyl-Coenzyme A dehydrogenase family, member 10

acyl-Coenzyme A dehydrogenase family, member 9  
acyl-Coenzyme A dehydrogenase family, member 9  
acyl-Coenzyme A dehydrogenase, C-2 to C-3 short chain  
acetyl-Coenzyme A acetyltransferase 1  
acetyl-Coenzyme A acetyltransferase 1  
acetyl-Coenzyme A acetyltransferase 1  
acetyl-Coenzyme A acetyltransferase 2  
acetyl-Coenzyme A acetyltransferase 2  
ATP citrate lyase  
ATP citrate lyase  
ATP citrate lyase  
aconitase 1, soluble  
aconitase 2, mitochondrial  
acyl-CoA thioesterase 13  
acyl-CoA thioesterase 4  
acyl-CoA thioesterase 7  
acyl-Coenzyme A oxidase 1, palmitoyl  
acyl-CoA synthetase family member 2  
acyl-CoA synthetase family member 3  
acyl-CoA synthetase long-chain family member 5  
acyl-CoA synthetase medium-chain family member 1  
acyl-CoA synthetase medium-chain family member 3  
acyl-CoA synthetase medium-chain family member 5  
acyl-CoA synthetase short-chain family member 2  
acyl-CoA synthetase short-chain family member 2  
aminoacylase 1  
aspartoacylase (aminocyclase) 3  
alcohol dehydrogenase 1C (class I), gamma polypeptide  
alcohol dehydrogenase, iron containing, 1  
alcohol dehydrogenase, iron containing, 1  
acireductone dioxygenase 1  
acireductone dioxygenase 1  
adenosine kinase  
adrenergic, alpha-1B-, receptor  
amino-terminal enhancer of split  
afamin  
afamin  
arylformamidase  
arylformamidase  
arylformamidase  
agmatine ureohydrolase (agmatinase)  
aminoglycoside phosphotransferase domain containing 1  
alanine-glyoxylate aminotransferase  
alanine-glyoxylate aminotransferase 2  
alanine-glyoxylate aminotransferase 2-like 1  
expressed sequence AI132709  
expressed sequence AI317395  
expressed sequence AI317395  
aminoacyl tRNA synthetase complex-interacting multifunctional protein 2  
adenylate kinase 2  
adenylate kinase 2  
adenylate kinase 3

adenylate kinase 3  
adenylate kinase 3-like 1  
adenylate kinase 3-like 1  
aldo-keto reductase family 1, member C12  
aldo-keto reductase family 1, member C12  
aldo-keto reductase family 1, member C13  
aldo-keto reductase family 1, member C14  
aldo-keto reductase family 1, member C19  
aldo-keto reductase family 1, member C20  
aldo-keto reductase family 1, member C21  
aldo-keto reductase family 1, member C4 (chlordecone reductase; 3-alpha hydroxysteroid d  
aldo-keto reductase family 1, member C-like 2  
aldo-keto reductase family 1, member D1 (delta 4-3-ketosteroid-5-beta-reductase)  
AKT interacting protein  
aminolevulinate, delta-, dehydratase  
aldehyde dehydrogenase 1 family, member A1  
aldehyde dehydrogenase family 1, subfamily A7  
aldehyde dehydrogenase 1 family, member B1  
aldehyde dehydrogenase 1 family, member L1  
aldehyde dehydrogenase 2 family (mitochondrial)  
aldehyde dehydrogenase 3 family, member A2  
aldehyde dehydrogenase 4 family, member A1  
aldehyde dehydrogenase 5 family, member A1  
aldehyde dehydrogenase 6 family, member A1  
aldehyde dehydrogenase 7 family, member A1  
aldehyde dehydrogenase 7 family, member A1  
aldehyde dehydrogenase 8 family, member A1  
aldehyde dehydrogenase 9 family, member A1  
asparagine-linked glycosylation 14 homolog (*S. cerevisiae*)  
anaphase promoting complex subunit 11  
anaphase promoting complex subunit 13  
angiogenin, ribonuclease, RNase A family, 5  
angiogenin, ribonuclease, RNase A family, 5  
angel homolog 2 (*Drosophila*)  
angiopoietin-like 2  
angiopoietin-like 3  
angiopoietin-like 6  
ankyrin repeat, family A (RFXANK-like), 2  
ankyrin repeat domain 13C  
annexin A6  
annexin A6  
annexin A7  
aldehyde oxidase 3  
adaptor-related protein complex 2, alpha 2 subunit  
adaptor-related protein complex 3, mu 1 subunit  
adaptor-related protein complex 3, mu 1 subunit  
adaptor-related protein complex 3, mu 1 subunit  
APAF1 interacting protein  
aprataxin and PNKP like factor  
apolipoprotein A-I binding protein  
apolipoprotein A-II  
apolipoprotein B48 receptor

apolipoprotein C-I  
apolipoprotein C-III  
apolipoprotein L, 3  
apolipoprotein L, 3  
apolipoprotein L 9b  
apolipoprotein O-like  
aquaporin 8  
androgen receptor  
androgen receptor  
ADP-ribosylation factor 4  
Rho guanine nucleotide exchange factor (GEF) 12  
Rho/Rac guanine nucleotide exchange factor (GEF) 2  
ADP-ribosylation factor-like 2  
ADP-ribosyltransferase 3  
ankyrin repeat and SOCS box-containing 6  
asialoglycoprotein receptor 2  
aspartoacylase (Canavan disease)  
alveolar soft part sarcoma chromosome region, candidate 1  
argininosuccinate synthetase 1  
ATG3 autophagy related 3 homolog (*S. cerevisiae*)  
ATG7 autophagy related 7 homolog (*S. cerevisiae*)  
ATH1, acid trehalase-like 1 (yeast)  
ATP synthase, H<sup>+</sup> transporting, mitochondrial F1 complex, alpha subunit 1, cardiac muscle  
ATP synthase, H<sup>+</sup> transporting, mitochondrial F1 complex, beta polypeptide  
ATP synthase, H<sup>+</sup> transporting, mitochondrial F1 complex, gamma polypeptide 1  
ATP synthase, H<sup>+</sup> transporting, mitochondrial F0 complex, subunit B1  
ATP synthase, H<sup>+</sup> transporting, mitochondrial F0 complex, subunit C1 (subunit 9)  
ATP synthase, H<sup>+</sup> transporting, mitochondrial F0 complex, subunit C3 (subunit 9)  
ATP synthase, H<sup>+</sup> transporting, mitochondrial F0 complex, subunit d  
ATP synthase, H<sup>+</sup> transporting, mitochondrial F0 complex, subunit E  
ATP synthase, H<sup>+</sup> transporting, mitochondrial F0 complex, subunit E  
ATP synthase, H<sup>+</sup> transporting, mitochondrial F0 complex, subunit E  
ATP synthase, H<sup>+</sup> transporting, mitochondrial F0 complex, subunit F6  
ATP synthase, H<sup>+</sup> transporting, mitochondrial F0 complex, subunit F2  
ATP synthase, H<sup>+</sup> transporting, mitochondrial F0 complex, subunit F2  
ATP5S-like  
ATPase, aminophospholipid transporter-like, class I, type 8A, member 2  
ataxin 2  
expressed sequence AU018778  
expressed sequence AW111846  
expressed sequence AW112010  
antizyme inhibitor 1  
antizyme inhibitor 1  
RIKEN cDNA B230114P17 gene  
beta-2-microglobulin  
RIKEN cDNA B930059L03 gene  
barrier to autointegration factor 1  
barrier to autointegration factor 1  
butyrobetaine (gamma), 2-oxoglutarate dioxygenase (gamma-butyrobetaine hydroxylase) 1  
butyrobetaine (gamma), 2-oxoglutarate dioxygenase (gamma-butyrobetaine hydroxylase) 1  
bobby sox homolog (*Drosophila*)  
cDNA sequence BC024137

cDNA sequence BC026585  
B-cell receptor-associated protein 31  
breast cancer anti-estrogen resistance 1  
butyrylcholinesterase  
butyrylcholinesterase  
beta-carotene oxygenase 2  
breakpoint cluster region  
3-hydroxybutyrate dehydrogenase, type 1  
3-hydroxybutyrate dehydrogenase, type 2  
betaine-homocysteine methyltransferase  
bicaudal D homolog 2 (Drosophila)  
biorientation of chromosomes in cell division 1-like  
bolA homolog 3 (E. coli)  
biphenyl hydrolase-like (serine hydrolase)  
BRCA1/BRCA2-containing complex, subunit 3  
brain protein I3  
bone marrow stromal cell antigen 2  
BTB (POZ) domain containing 2  
blood vessel epicardial substance  
chromosome 11 open reading frame 17  
chromosome 11 open reading frame 54  
chromosome 11 open reading frame 54  
chromosome 11 open reading frame 73  
chromosome 12 open reading frame 73  
chromosome 14 open reading frame 126  
chromosome 14 open reading frame 149  
chromosome 14 open reading frame 159  
chromosome 16 open reading frame 13  
chromosome 16 open reading frame 14  
chromosome 16 open reading frame 68  
chromosome 17 open reading frame 37  
chromosome 17 open reading frame 39  
chromosome 17 open reading frame 68  
chromosome 17 open reading frame 80  
chromosome 18 open reading frame 1  
chromosome 18 open reading frame 19  
chromosome 18 open reading frame 55  
chromosome 19 open reading frame 60  
chromosome 1 open reading frame 144  
chromosome 1 open reading frame 210  
chromosome 1 open reading frame 50  
chromosome 20 open reading frame 196  
chromosome 20 open reading frame 196  
chromosome 20 open reading frame 72  
chromosome 21 open reading frame 33  
chromosome 22 open reading frame 32  
C2 calcium-dependent domain containing 2  
C2 calcium-dependent domain containing 2  
C2 calcium-dependent domain containing 2  
chromosome 2 open reading frame 44  
complement component 3a receptor 1  
chromosome 4 open reading frame 33



chromosome 5 open reading frame 33  
chromosome 5 open reading frame 45  
chromosome 6 open reading frame 1  
chromosome 6 open reading frame 105  
chromosome 6 open reading frame 108  
chromosome 6 open reading frame 120  
chromosome 6 open reading frame 125  
chromosome 6 open reading frame 162  
chromosome 6 open reading frame 89  
chromosome 6 open reading frame 89  
RIKEN cDNA C730007P19 gene  
RIKEN cDNA C730036E19 gene  
hypothetical protein C730043O17  
expressed sequence C76669  
chromosome 7 open reading frame 47  
chromosome 7 open reading frame 55  
chromosome 7 open reading frame 59  
complement component 8, gamma polypeptide  
chromosome 9 open reading frame 119  
chromosome 9 open reading frame 95  
carbonic anhydrase I  
carbonic anhydrase XIV  
carbonic anhydrase III, muscle specific  
carbonic anhydrase VA, mitochondrial  
calcium binding and coiled-coil domain 1  
calmodulin 1 (phosphorylase kinase, delta)  
calmodulin 1 (phosphorylase kinase, delta)  
catalase  
cysteine conjugate-beta lyase 2  
coiled-coil domain containing 107  
coiled-coil domain containing 30  
coiled-coil domain containing 53  
coiled-coil domain containing 56  
cyclin D1  
cyclin D2  
cyclin D2  
cyclin L2  
CCR4 carbon catabolite repression 4-like (*S. cerevisiae*)  
copper chaperone for superoxide dismutase  
CD151 molecule (Raph blood group)  
CD1d molecule  
CD1d molecule  
CD36 molecule (thrombospondin receptor)  
CD36 molecule (thrombospondin receptor)  
CD36 molecule (thrombospondin receptor)  
CD59a antigen  
CD59a antigen  
CD82 molecule

cyclin-dependent kinase 2 associated protein 2  
CDP-diacylglycerol synthase (phosphatidate cytidyltransferase) 2  
CCAAT/enhancer binding protein (C/EBP), alpha  
chymotrypsin-like elastase family, member 1  
centromere protein M  
carboxylesterase 1 (monocyte/macrophage serine esterase 1)  
carboxylesterase 1 (monocyte/macrophage serine esterase 1)  
carboxylesterase 1 (monocyte/macrophage serine esterase 1)  
carboxylesterase 1  
carboxylesterase 2  
carboxylesterase 3  
carboxylesterase 5  
carboxylesterase 6  
coiled-coil-helix-coiled-coil-helix domain containing 10  
coiled-coil-helix-coiled-coil-helix domain containing 3  
choline dehydrogenase  
cell death-inducing DFFA-like effector b  
CDGSH iron sulfur domain 1  
CDGSH iron sulfur domain 3  
chloride channel 2  
C-type lectin domain family 14, member A  
calmin (calponin-like, transmembrane)  
calmin (calponin-like, transmembrane)  
calmin (calponin-like, transmembrane)  
cytidine monophosphate-N-acetylneuraminic acid hydroxylase (CMP-N-acetylneuraminic acid monooxygenase)  
carboxymethylenebutenolidase homolog (Pseudomonas)  
camello-like 1  
camello-like 2  
camello-like 2  
CKLF-like MARVEL transmembrane domain containing 8  
cornichon homolog (Drosophila)  
CCR4-NOT transcription complex, subunit 8  
component of oligomeric golgi complex 4  
component of oligomeric golgi complex 4  
component of oligomeric golgi complex 6  
collagen, type XIV, alpha 1  
collagen, type XIV, alpha 1  
collagen, type XXVII, alpha 1  
collagen, type III, alpha 1  
collagen, type V, alpha 1  
collagen, type VI, alpha 3  
collectin sub-family member 11  
copper metabolism (Murr1) domain containing 1  
COP9 constitutive photomorphogenic homolog subunit 7A (Arabidopsis)  
coatamer protein complex, subunit zeta 2  
coronin 6  
COX16 cytochrome c oxidase assembly homolog (S. cerevisiae)  
COX19 cytochrome c oxidase assembly homolog (S. cerevisiae)  
cytochrome c oxidase subunit Vb  
cytochrome c oxidase subunit Vb  
cytochrome c oxidase subunit VIa polypeptide 1

cytochrome c oxidase subunit V**i**b polypeptide 1 (ubiquitous)  
cytochrome c oxidase subunit V**i**b polypeptide 1 (ubiquitous)  
cytochrome c oxidase subunit V**i**c  
cytochrome c oxidase subunit V**II**a polypeptide 2 (liver)  
cytochrome c oxidase subunit V**II**a polypeptide 2 (liver)  
cytochrome c oxidase subunit V**II**c  
cytochrome c oxidase subunit 8A (ubiquitous)  
cytochrome c oxidase subunit 8A (ubiquitous)  
cysteine-rich with EGF-like domains 1  
crystallin, lambda 1  
crystallin, lambda 1  
crystallin, zeta (quinone reductase)  
casein kinase 2, alpha 1 polypeptide  
component of Sp100-rs  
component of Sp100-rs  
catenin (cadherin-associated protein), beta 1, 88kDa  
cathepsin B  
cathepsin B  
cathepsin O  
cutA divalent cation tolerance homolog (E. coli)  
CWF19-like 1, cell cycle control (S. pombe)  
chemokine (C-X3-C motif) ligand 1  
chromosome X open reading frame 56  
cytochrome b5 type A (microsomal)  
cytochrome b5 type B (outer mitochondrial membrane)  
cytochrome b5 type B (outer mitochondrial membrane)  
cytochrome b5 type B (outer mitochondrial membrane)  
cytochrome b5 reductase 3  
cysteine/histidine-rich 1  
cytochrome P450, family 1, subfamily A, polypeptide 2  
cytochrome P450, family 2, subfamily A, polypeptide 13  
cytochrome P450, family 2, subfamily b, polypeptide 13  
cytochrome P450, family 2, subfamily B, polypeptide 6  
cytochrome P450, family 2, subfamily B, polypeptide 6  
cytochrome P450, family 2, subfamily b, polypeptide 9  
cytochrome P450, family 2, subfamily C, polypeptide 18  
cytochrome P450, family 2, subfamily C, polypeptide 19  
cytochrome P450, family 2, subfamily C, polypeptide 19  
cytochrome P450, family 2, subfamily C, polypeptide 19  
cytochrome P450, family 2, subfamily c, polypeptide 29  
cytochrome P450, family 2, subfamily c, polypeptide 38  
cytochrome P450, family 2, subfamily c, polypeptide 39  
cytochrome P450, family 2, subfamily c, polypeptide 44  
cytochrome P450, family 2, subfamily c, polypeptide 68  
cytochrome P450, family 2, subfamily d, polypeptide 13  
cytochrome P450, family 2, subfamily d, polypeptide 26  
cytochrome P450, family 2, subfamily D, polypeptide 6  
cytochrome P450, family 2, subfamily D, polypeptide 6  
cytochrome P450, family 2, subfamily E, polypeptide 1  
cytochrome P450, family 2, subfamily F, polypeptide 1  
cytochrome P450, family 2, subfamily J, polypeptide 2

cytochrome P450, family 2, subfamily j, polypeptide 5  
cytochrome P450, family 3, subfamily A, polypeptide 4  
cytochrome P450, family 3, subfamily A, polypeptide 4  
cytochrome P450, family 4, subfamily A, polypeptide 11  
cytochrome P450, family 4, subfamily F, polypeptide 12  
cytochrome P450, family 4, subfamily F, polypeptide 2  
cytochrome P450, family 4, subfamily V, polypeptide 2  
cytochrome P450, family 4, subfamily V, polypeptide 2  
cytochrome P450, family 7, subfamily B, polypeptide 1  
cytochrome P450, family 7, subfamily B, polypeptide 1  
cystin 1  
D-2-hydroxyglutarate dehydrogenase  
RIKEN cDNA D730039F16 gene  
RIKEN cDNA D830046C22 gene  
RIKEN cDNA D930017J03 gene  
aspartyl-tRNA synthetase  
aspartyl-tRNA synthetase 2, mitochondrial  
D site of albumin promoter (albumin D-box) binding protein  
dodecenoyl-Coenzyme A delta isomerase (3,2 trans-enoyl-Coenzyme A isomerase)  
doublecortin-like kinase 3  
DNA cross-link repair 1A (PSO2 homolog, *S. cerevisiae*)  
dopachrome tautomerase (dopachrome delta-isomerase, tyrosine-related protein 2)  
dicarbonyl/L-xylulose reductase  
dimethylarginine dimethylaminohydrolase 1  
dimethylarginine dimethylaminohydrolase 1  
dimethylarginine dimethylaminohydrolase 1  
dimethylarginine dimethylaminohydrolase 1  
D-dopachrome tautomerase  
2,4-dienoyl CoA reductase 1, mitochondrial  
DEP domain containing 6  
DEP domain containing 6  
DEP domain containing 6  
2-deoxyribose-5-phosphate aldolase homolog (*C. elegans*)  
Der1-like domain family, member 2  
diacylglycerol O-acyltransferase homolog 2 (mouse)  
diacylglycerol O-acyltransferase homolog 2 (mouse)  
dehydrogenase/reductase (SDR family) member 1  
dehydrogenase/reductase (SDR family) member 11  
dehydrogenase/reductase (SDR family) member 3  
dehydrogenase/reductase (SDR family) member 7  
dehydrogenase/reductase (SDR family) member 7B  
deleted in lymphocytic leukemia 2 (non-protein coding)  
dystrophin  
dimethylglycine dehydrogenase  
DnaJ (Hsp40) homolog, subfamily B, member 2  
DnaJ (Hsp40) homolog, subfamily B, member 6  
dopey family member 2  
dipeptidyl-peptidase 4  
dipeptidyl-peptidase 4  
dipeptidyl-peptidase 4  
dipeptidyl-peptidase 8

dihydropyrimidinase  
dihydropyrimidinase  
desmoglein 2  
dual specificity phosphatase 19  
dynein, light chain, LC8-type 2  
dynein, light chain, Tctex-type 3  
dynein, light chain, Tctex-type 3  
RIKEN cDNA E530001K10 gene  
enoyl Coenzyme A hydratase domain containing 1  
enoyl Coenzyme A hydratase domain containing 2  
enoyl Coenzyme A hydratase domain containing 3  
enoyl Coenzyme A hydratase, short chain, 1, mitochondrial  
extracellular matrix protein 1  
ECSIT homolog (Drosophila)  
ER degradation enhancer, mannosidase alpha-like 1  
eukaryotic elongation factor-2 kinase  
ephrin-A5  
egl nine homolog 3 (C. elegans)  
EH-domain containing 3  
EH-domain containing 3  
eukaryotic translation initiation factor 4A, isoform 2  
ELOVL family member 6, elongation of long chain fatty acids (FEN1/Elo2, SUR4/Elo3-like, yeast)  
ELOVL family member 6, elongation of long chain fatty acids (FEN1/Elo2, SUR4/Elo3-like, yeast)  
ELOVL family member 6, elongation of long chain fatty acids (FEN1/Elo2, SUR4/Elo3-like, yeast)  
enolase 1, (alpha)  
enolase 1, (alpha)  
ectonucleotide pyrophosphatase/phosphodiesterase 1  
ectonucleoside triphosphate diphosphohydrolase 5  
epoxide hydrolase 1, microsomal (xenobiotic)  
epoxide hydrolase 2, cytoplasmic  
Era G-protein-like 1 (E. coli)  
endoplasmic reticulum-golgi intermediate compartment (ERGIC) 1  
ERGIC and golgi 3  
ERGIC and golgi 3  
esterase 22  
esterase D/formylglutathione hydrolase  
ethylmalonic encephalopathy 1  
exocyst complex component 4  
exocyst complex component 8  
fatty acid amide hydrolase  
fatty acid amide hydrolase  
fatty acid binding protein 1, liver  
fatty acid binding protein 2, intestinal  
fatty acid desaturase 1  
fatty acid desaturase 2  
fatty acid desaturase 2  
fatty acid desaturase 2  
fumarylacetoacetate hydrolase (fumarylacetoacetase)  
fumarylacetoacetate hydrolase domain containing 2A  
fumarylacetoacetate hydrolase domain containing 2A  
fumarylacetoacetate hydrolase domain containing 2A

family with sequence similarity 102, member A  
family with sequence similarity 102, member A  
family with sequence similarity 107, member B  
family with sequence similarity 107, member B  
family with sequence similarity 120B  
family with sequence similarity 129, member A  
family with sequence similarity 132, member A  
family with sequence similarity 136, member A  
family with sequence similarity 149, member B1  
family with sequence similarity 158, member A  
family with sequence similarity 162, member A  
family with sequence similarity 19 (chemokine (C-C motif)-like), member A2  
family with sequence similarity 64, member A  
family with sequence similarity 82, member B  
family with sequence similarity 96, member B  
fatty acid synthase  
F-box protein, helicase, 18  
F-box protein 3  
Fc fragment of IgG, low affinity IIb, receptor (CD32)  
Fc fragment of IgG, low affinity IIb, receptor (CD32)  
Fc fragment of IgG, receptor, transporter, alpha  
FCH and double SH3 domains 2  
fibroblast growth factor 1 (acidic)  
FGGY carbohydrate kinase domain containing  
fat storage-inducing transmembrane protein 1  
FK506 binding protein 4, 59kDa  
glutaredoxin-like protein YDR286C homolog  
filamin B, beta  
flavin containing monooxygenase 1  
flavin containing monooxygenase 5  
fructosamine 3 kinase  
fibronectin type III domain containing 4  
ferritin, heavy polypeptide 1  
ferritin, light polypeptide  
ferritin, light polypeptide  
FXVD domain containing ion transport regulator 1  
GABA(A) receptor-associated protein like 1  
GABA(A) receptor-associated protein like 1  
growth arrest and DNA-damage-inducible, alpha  
galactose mutarotase (aldose 1-epimerase)  
galactose mutarotase (aldose 1-epimerase)  
guanidinoacetate N-methyltransferase  
glyceraldehyde-3-phosphate dehydrogenase  
growth arrest-specific 1  
growth arrest-specific 1  
growth arrest-specific 2  
golgi-specific brefeldin A resistant guanine nucleotide exchange factor 1  
glycine C-acetyltransferase (2-amino-3-ketobutyrate coenzyme A ligase)  
glutaryl-Coenzyme A dehydrogenase  
GTP cyclohydrolase 1  
GTP cyclohydrolase 1

growth differentiation factor 2  
G elongation factor, mitochondrial 2  
growth hormone inducible transmembrane protein  
growth hormone receptor  
growth hormone receptor  
growth hormone receptor  
glutaredoxin 3  
glutaminase 2 (liver, mitochondrial)  
predicted gene 7609  
glucosamine-6-phosphate deaminase 1  
glutamic-oxaloacetic transaminase 2, mitochondrial (aspartate aminotransferase 2)  
glypican 4  
glycerol-3-phosphate dehydrogenase 1-like  
gephyrin  
gephyrin  
G protein-coupled receptor 182  
glutathione peroxidase 1  
glutathione peroxidase 6 (olfactory)  
gelsolin (amyloidosis, Finnish type)  
glutathione S-transferase alpha 3  
glutathione S-transferase alpha 3  
glutathione S-transferase alpha 4  
glutathione S-transferase alpha 5  
glutathione S-transferase alpha 5  
glutathione S-transferase kappa 1  
glutathione S-transferase mu 1  
glutathione S-transferase mu 2 (muscle)  
glutathione S-transferase, mu 3  
glutathione S-transferase, mu 3  
glutathione S-transferase mu 4  
glutathione S-transferase mu 5  
glutathione S-transferase mu 5  
glutathione S-transferase mu 5  
glutathione S-transferase mu 5  
glutathione S-transferase, mu 6  
glutathione S-transferase theta 1  
glutathione S-transferase theta 2  
glutathione S-transferase, theta 3  
glycosyltransferase-like domain containing 1  
general transcription factor Iii  
general transcription factor Iii  
gulonolactone (L-) oxidase  
3-hydroxyanthranilate 3,4-dioxygenase  
hyaluronan binding protein 4  
hyaluronan binding protein 4  
hydroxyacyl-Coenzyme A dehydrogenase  
hydroxyacyl-Coenzyme A dehydrogenase  
hydroxyacylglutathione hydrolase  
hepcidin antimicrobial peptide  
hepcidin antimicrobial peptide

host cell factor C1 regulator 1 (XPO1 dependent)  
hypothetical protein LOC401399  
histone deacetylase 3  
haloacid dehalogenase-like hydrolase domain containing 2  
heme binding protein 1  
HemK methyltransferase family member 1  
HemK methyltransferase family member 1  
hairy and enhancer of split 6 (Drosophila)  
hexosaminidase B (beta polypeptide)  
hemochromatosis  
homogentisate 1,2-dioxygenase (homogentisate oxidase)  
3-hydroxyisobutyrate dehydrogenase  
3-hydroxyisobutyrate dehydrogenase  
3-hydroxyisobutyryl-Coenzyme A hydrolase  
histidine triad nucleotide binding protein 3  
histone cluster 1, H2bd  
histone cluster 1, H2bd  
histone cluster 1, H3f  
histone cluster 2, H2ac  
histone cluster 2, H2ac  
major histocompatibility complex, class I, A  
major histocompatibility complex, class I, E  
major histocompatibility complex, class I, G  
hydroxymethylbilane synthase  
heterogeneous nuclear ribonucleoprotein C (C1/C2)  
4-hydroxyphenylpyruvate dioxygenase  
hydroxyprostaglandin dehydrogenase 15-(NAD)  
hydroxyprostaglandin dehydrogenase 15-(NAD)  
Hermansky-Pudlak syndrome 4  
heat-responsive protein 12  
heat shock factor binding protein 1  
heat shock factor binding protein 1  
hydroxysteroid (11-beta) dehydrogenase 1  
hydroxysteroid (17-beta) dehydrogenase 10  
hydroxysteroid (17-beta) dehydrogenase 11  
hydroxysteroid (17-beta) dehydrogenase 12  
hydroxysteroid (17-beta) dehydrogenase 12  
hydroxy-delta-5-steroid dehydrogenase, 3 beta- and steroid delta-isomerase 1  
hydroxy-delta-5-steroid dehydrogenase, 3 beta- and steroid delta-isomerase 1  
hydroxy-delta-5-steroid dehydrogenase, 3 beta- and steroid delta-isomerase 3  
hydroxy-delta-5-steroid dehydrogenase, 3 beta- and steroid delta-isomerase 7  
heat shock protein 90kDa alpha (cytosolic), class B member 1  
heat shock protein 90kDa alpha (cytosolic), class B member 1  
heat shock 70kDa protein 4  
heat shock 10kDa protein 1 (chaperonin 10)  
hydroxypyruvate isomerase homolog (E. coli)  
intercellular adhesion molecule 2  
isocitrate dehydrogenase 1 (NADP+), soluble  
isocitrate dehydrogenase 2 (NADP+), mitochondrial  
isocitrate dehydrogenase 3 (NAD+) beta



isocitrate dehydrogenase 3 (NAD<sup>+</sup>) gamma  
indoleamine 2,3-dioxygenase 2  
intermediate filament family orphan 2  
interferon, alpha-inducible protein 27  
interferon, alpha-inducible protein 27  
interferon, alpha-inducible protein 27-like 2  
interferon-induced protein with tetratricopeptide repeats 3  
interferon responsive gene 15  
interferon responsive gene 15  
interferon responsive gene 15  
interleukin 10  
IMP1 inner mitochondrial membrane peptidase-like (*S. cerevisiae*)  
IMP2 inner mitochondrial membrane peptidase-like (*S. cerevisiae*)  
inner membrane protein, mitochondrial (mitofilin)  
inhibitor of growth family, member 4  
indolethylamine N-methyltransferase  
IQ motif containing GTPase activating protein 1  
interferon regulatory factor 7  
insulin receptor substrate 1  
isochorismatase domain containing 1  
isochorismatase domain containing 1  
isochorismatase domain containing 1  
isochorismatase domain containing 2b  
integrin, alpha 9  
integral membrane protein 2B  
isovaleryl Coenzyme A dehydrogenase  
isovaleryl Coenzyme A dehydrogenase  
Josephin domain containing 2  
potassium inwardly-rectifying channel, subfamily J, member 6  
potassium channel, subfamily K, member 5  
potassium channel tetramerisation domain containing 2  
potassium channel tetramerisation domain containing 21  
kidney expressed gene 1  
Kell blood group, metallo-endopeptidase  
ketohexokinase (fructokinase)  
KIAA0319-like  
KIAA0323  
KIAA0564  
KIAA0564  
KIAA1522  
KIAA1737  
kinesin family member 2C  
kinesin light chain 4  
kelch-like 13 (*Drosophila*)  
kallikrein B, plasma (Fletcher factor) 1  
kynurenine 3-monooxygenase (kynurenine 3-hydroxylase)  
lactation elevated 1  
lactamase, beta 2  
ladinin 1  
laminin, alpha 4

limb bud and heart development homolog (mouse)  
late cornified envelope 1H  
lysocardiolipin acyltransferase 1  
leukocyte cell derived chemotaxin 1  
leukocyte cell-derived chemotaxin 2  
lectin, galactoside-binding, soluble, 1  
lectin, galactoside-binding, soluble, 1  
lectin, galactoside-binding, soluble, 9B  
lipoma HMGIC fusion partner-like 2  
leukemia inhibitory factor receptor alpha  
LIM domain and actin binding 1  
LIM domain and actin binding 1  
LIM domain and actin binding 1  
lin-7 homolog A (C. elegans)  
lin-7 homolog A (C. elegans)  
lipase, hepatic  
lipase, endothelial  
lipoyltransferase 1  
lectin, mannose-binding, 1  
lectin, mannose-binding, 1  
lectin, mannose-binding 2  
lipase maturation factor 1  
lamin B1  
similar to hCG1795014  
hypothetical LOC100130633  
hypothetical protein LOC389203  
ribosomal protein L15 pseudogene 3  
similar to S-phase kinase-associated protein 1A (p19A)  
hypothetical protein LOC729991  
exonuclease NEF-sp  
lon peptidase 1, mitochondrial  
leucine rich repeat and fibronectin type III domain containing 1  
leucine rich repeat containing 8 family, member A  
leucine rich repeat containing 8 family, member D  
leucine-rich repeats and transmembrane domains 1  
LSM domain containing 1  
latent transforming growth factor beta binding protein 4  
LYR motif containing 5  
leucine-zipper-like transcription regulator 1  
MACRO domain containing 1  
MAP-kinase activating death domain  
v-maf musculoaponeurotic fibrosarcoma oncogene homolog B (avian)  
v-maf musculoaponeurotic fibrosarcoma oncogene homolog G (avian)  
melanoma antigen, family A, 7  
magnesium transporter 1  
monoamine oxidase B

mitogen-activated protein kinase 1  
MARVEL domain containing 1  
mannan-binding lectin serine peptidase 2  
mitochondrial antiviral signaling protein  
membrane bound O-acyltransferase domain containing 7  
methylcrotonoyl-Coenzyme A carboxylase 1 (alpha)  
methylcrotonoyl-Coenzyme A carboxylase 1 (alpha)  
methylcrotonoyl-Coenzyme A carboxylase 2 (beta)  
methylcrotonoyl-Coenzyme A carboxylase 2 (beta)  
methylcrotonoyl-Coenzyme A carboxylase 2 (beta)  
methylmalonyl CoA epimerase  
minichromosome maintenance complex component 3 associated protein  
malate dehydrogenase 1, NAD (soluble)  
malate dehydrogenase 1, NAD (soluble)  
malic enzyme 1, NADP(+)-dependent, cytosolic  
male-enhanced antigen 1  
male-enhanced antigen 1  
maternally expressed 3  
methyltransferase 10 domain containing  
methyltransferase 11 domain containing 1  
methyltransferase 11 domain containing 1  
methyltransferase like 7A  
methyltransferase like 7A  
methyltransferase like 7A  
methyltransferase like 7A  
methyltransferase like 7B  
methyltransferase like 8  
MAX gene associated  
microsomal glutathione S-transferase 3  
melanoma inhibitory activity 2  
MID1 interacting protein 1 (gastrulation specific G12 homolog (zebrafish))  
mitochondrial intermediate peptidase  
McKusick-Kaufman syndrome  
malectin  
malectin  
melanophilin  
MLX interacting protein-like  
malonyl-CoA decarboxylase  
membrane metallo-endopeptidase  
matrix metallopeptidase 15 (membrane-inserted)  
matrix metallopeptidase 19  
MOCO sulphurase C-terminal domain containing 2  
motile sperm domain containing 2  
mitochondrial ribosomal protein L13  
mitochondrial ribosomal protein L14  
mitochondrial ribosomal protein L15  
mitochondrial ribosomal protein L15  
mitochondrial ribosomal protein L24  
mitochondrial ribosomal protein L37  
mitochondrial ribosomal protein L42

mitochondrial ribosomal protein S16  
mitochondrial ribosomal protein S18A  
mitochondrial ribosomal protein S21  
mitochondrial ribosomal protein S27  
mitochondrial ribosomal protein S6  
methionine sulfoxide reductase A  
methylenetetrahydrofolate dehydrogenase (NADP+ dependent) 1, methenyltetrahydrofolate cyclohydrolase,  
myotubularin related protein 9  
mitochondrial E3 ubiquitin ligase 1  
major urinary protein 3  
methylmalonyl Coenzyme A mutase  
methylmalonyl Coenzyme A mutase  
MAX dimerization protein 4  
NEDD4 binding protein 1  
NAD kinase  
NAD kinase  
N-acetylglucosamine kinase  
N-acetyltransferase 2 (arylamine N-acetyltransferase)  
neurocalcin delta  
nuclear cap binding protein subunit 2, 20kDa  
non-protein coding RNA 81  
non-protein coding RNA 116  
Nedd4 family interacting protein 1  
NDRG family member 2  
NADH dehydrogenase (ubiquinone) 1 alpha subcomplex, 3, 9kDa  
NADH dehydrogenase (ubiquinone) 1 alpha subcomplex, 3, 9kDa  
NADH dehydrogenase (ubiquinone) 1 alpha subcomplex, 5, 13kDa  
NADH dehydrogenase (ubiquinone) 1 alpha subcomplex, 7, 14.5kDa  
NADH dehydrogenase (ubiquinone) 1 alpha subcomplex, 9, 39kDa  
NADH dehydrogenase (ubiquinone) 1, alpha/beta subcomplex, 1, 8kDa  
NADH dehydrogenase (ubiquinone) 1 beta subcomplex, 10, 22kDa  
NADH dehydrogenase (ubiquinone) 1 beta subcomplex, 11, 17.3kDa  
NADH dehydrogenase (ubiquinone) 1 beta subcomplex, 2, 8kDa  
NADH dehydrogenase (ubiquinone) 1 beta subcomplex, 3, 12kDa  
NADH dehydrogenase (ubiquinone) 1 beta subcomplex, 4, 15kDa  
NADH dehydrogenase (ubiquinone) 1 beta subcomplex, 4, 15kDa  
NADH dehydrogenase (ubiquinone) 1 beta subcomplex, 5, 16kDa  
NADH dehydrogenase (ubiquinone) 1 beta subcomplex, 6, 17kDa  
NADH dehydrogenase (ubiquinone) 1 beta subcomplex, 7, 18kDa  
NADH dehydrogenase (ubiquinone) 1 beta subcomplex, 8, 19kDa  
NADH dehydrogenase (ubiquinone) 1 beta subcomplex, 9, 22kDa  
NADH dehydrogenase (ubiquinone) 1, subcomplex unknown, 1, 6kDa  
NADH dehydrogenase (ubiquinone) 1, subcomplex unknown, 2, 14.5kDa  
NADH dehydrogenase (ubiquinone) 1, subcomplex unknown, 2, 14.5kDa  
NADH dehydrogenase (ubiquinone) Fe-S protein 3, 30kDa (NADH-coenzyme Q reductase)  
NADH dehydrogenase (ubiquinone) Fe-S protein 5, 15kDa (NADH-coenzyme Q reductase)  
NADH dehydrogenase (ubiquinone) Fe-S protein 8, 23kDa (NADH-coenzyme Q reductase)

NADH dehydrogenase (ubiquinone) Fe-S protein 8, 23kDa (NADH-coenzyme Q reductase)  
NADH dehydrogenase (ubiquinone) Fe-S protein 8, 23kDa (NADH-coenzyme Q reductase)  
NADH dehydrogenase (ubiquinone) flavoprotein 1, 51kDa  
N-terminal EF-hand calcium binding protein 1  
neurofibromin 2 (merlin)  
NFS1 nitrogen fixation 1 homolog (*S. cerevisiae*)  
NFU1 iron-sulfur cluster scaffold homolog (*S. cerevisiae*)  
neuronal guanine nucleotide exchange factor  
nipsnap homolog 1 (*C. elegans*)  
nischarin  
nitrilase family, member 2  
neurolysin (metallopeptidase M3 family)  
NLR family, pyrin domain containing 6  
non-metastatic cells 6, protein expressed in (nucleoside-diphosphate kinase)  
nicotinamide nucleotide transhydrogenase  
aminopeptidase-like 1  
NAD(P)H dehydrogenase, quinone 2  
NAD(P)H dehydrogenase, quinone 2  
NAD(P)H dehydrogenase, quinone 2  
nuclear receptor subfamily 1, group H, member 3  
nuclear receptor subfamily 1, group I, member 2  
nuclear receptor subfamily 1, group I, member 2  
nuclear receptor subfamily 5, group A, member 2  
neuropilin 2  
netrin 3  
neurotrophic tyrosine kinase, receptor, type 2  
neurotrophic tyrosine kinase, receptor, type 2  
neurotrophic tyrosine kinase, receptor, type 3  
nucleobindin 1  
nudix (nucleoside diphosphate linked moiety X)-type motif 1  
nudix (nucleoside diphosphate linked moiety X)-type motif 13  
nudix (nucleoside diphosphate linked moiety X)-type motif 7  
nudix (nucleoside diphosphate linked moiety X)-type motif 8  
nuclear mitotic apparatus protein 1  
OAF homolog (*Drosophila*)  
2',5'-oligoadenylate synthetase 1, 40/46kDa  
2'-5' oligoadenylate synthetase-like 2  
ornithine aminotransferase (gyrate atrophy)  
ornithine decarboxylase antizyme 1  
oligonucleotide/oligosaccharide-binding fold containing 1  
OCIA domain containing 2  
oncoprotein induced transcript 3  
OMA1 homolog, zinc metallopeptidase (*S. cerevisiae*)  
olfactory receptor, family 10, subfamily AD, member 1  
O-sialoglycoprotein endopeptidase  
ornithine carbamoyltransferase  
ornithine carbamoyltransferase  
ornithine carbamoyltransferase  
purinergic receptor P2Y, G-protein coupled, 1  
phosphofurin acidic cluster sorting protein 2

palladin, cytoskeletal associated protein  
pantothenate kinase 1  
polyamine oxidase (exo-N4-amino)  
3'-phosphoadenosine 5'-phosphosulfate synthase 2  
3'-phosphoadenosine 5'-phosphosulfate synthase 2  
3'-phosphoadenosine 5'-phosphosulfate synthase 2  
par-3 partitioning defective 3 homolog (C. elegans)  
poly (ADP-ribose) polymerase 1  
parvin, alpha  
phenazine biosynthesis-like protein domain containing  
phenazine biosynthesis-like protein domain containing  
pterin-4 alpha-carbinolamine dehydratase/dimerization cofactor of hepatocyte nuclear factor 1 alpha  
pterin-4 alpha-carbinolamine dehydratase/dimerization cofactor of hepatocyte nuclear factor 1 alpha (TCF1) 2  
propionyl Coenzyme A carboxylase, alpha polypeptide  
propionyl Coenzyme A carboxylase, beta polypeptide  
protein-L-isoaspartate (D-aspartate) O-methyltransferase domain containing 1  
protein-L-isoaspartate (D-aspartate) O-methyltransferase domain containing 2  
proprotein convertase subtilisin/kexin type 6  
PCTAIRE protein kinase 1  
PCTAIRE protein kinase 3  
phosphatidylcholine transfer protein  
prenylcysteine oxidase 1  
programmed cell death 6 interacting protein  
programmed cell death 6 interacting protein  
phosphodiesterase 4D interacting protein  
phosphodiesterase 4D interacting protein  
pyruvate dehydrogenase (lipoamide) alpha 1  
pyruvate dehydrogenase kinase, isozyme 1  
pyruvate dehydrogenase kinase, isozyme 1  
pyruvate dehydrogenase kinase, isozyme 2  
p53 and DNA-damage regulated 1  
pyridoxal (pyridoxine, vitamin B6) kinase  
PDZ domain containing 1  
phosphatidylethanolamine binding protein 1  
phosphatidylethanolamine binding protein 1  
peroxisomal trans-2-enoyl-CoA reductase  
peptidase D  
period homolog 2 (Drosophila)  
period homolog 2 (Drosophila)  
PET112-like (yeast)  
peroxisomal biogenesis factor 11 gamma  
peroxisomal biogenesis factor 11 gamma  
peroxisomal biogenesis factor 6  
peroxisomal biogenesis factor 6  
prefoldin subunit 2  
phosphofructokinase, liver  
post-GPI attachment to proteins 2  
pyroglutamyl-peptidase I  
progesterone receptor membrane component 1

phosphatidylinositol glycan anchor biosynthesis, class Q  
polymeric immunoglobulin receptor  
phosphoinositide-3-kinase, regulatory subunit 1 (alpha)  
pipelicolic acid oxidase  
pitrilysin metalloproteinase 1  
pyruvate kinase, liver and RBC  
pyruvate kinase, liver and RBC  
pyruvate kinase, liver and RBC  
phospholipase A2, group VI (cytosolic, calcium-independent)  
phospholipid scramblase 2  
peptidase M20 domain containing 1  
peptidase M20 domain containing 1  
peptidase (mitochondrial processing) beta  
polymerase 3  
polymerase (DNA directed), gamma  
protein-O-mannosyltransferase 1  
paraoxonase 1  
peroxisome proliferator-activated receptor alpha  
peroxisome proliferator-activated receptor alpha  
peroxisome proliferator-activated receptor alpha  
phosphopantothenoylcysteine decarboxylase  
pancreatic progenitor cell differentiation and proliferation factor homolog (zebrafish)  
protein phosphatase 1, regulatory (inhibitor) subunit 11  
protein phosphatase 1, regulatory (inhibitor) subunit 15B  
protein phosphatase 1, regulatory (inhibitor) subunit 3E  
prolylcarboxypeptidase (angiotensinase C)  
peroxiredoxin 2  
peroxiredoxin 3  
peroxiredoxin 6  
proline/arginine-rich end leucine-rich repeat protein  
protein kinase, cAMP-dependent, catalytic, alpha  
protein kinase, AMP-activated, gamma 2 non-catalytic subunit  
protein kinase C, zeta  
protein kinase, interferon-inducible double stranded RNA dependent activator  
prolactin receptor  
prolactin receptor  
prolactin receptor  
prion protein  
prion protein  
proline dehydrogenase (oxidase) 2  
phosphoribosyl pyrophosphate synthetase-associated protein 2  
proline rich 13  
proline-rich transmembrane protein 1  
protease, serine, 36  
presenilin 2 (Alzheimer disease 4)  
proteasome (prosome, macropain) subunit, alpha type, 1  
proteasome (prosome, macropain) 26S subunit, non-ATPase, 2  
proteasome (prosome, macropain) 26S subunit, non-ATPase, 5  
proteasome (prosome, macropain) activator subunit 2 (PA28 beta)

prostaglandin reductase 2  
prostaglandin reductase 2  
prostaglandin reductase 2  
prostaglandin reductase 2  
PTK2B protein tyrosine kinase 2 beta  
parathyrosin  
parathyrosin  
prostate tumor overexpressed 1  
protein tyrosine phosphatase, receptor type, D  
6-pyruvoyltetrahydropterin synthase  
pituitary tumor-transforming 1  
pituitary tumor-transforming 1  
pumilio homolog 1 (*Drosophila*)  
poliovirus receptor-related 3  
peroxisomal membrane protein 2, 22kDa  
pyrroline-5-carboxylate reductase-like  
phosphorylase, glycogen, liver  
quinoid dihydropteridine reductase  
quinoid dihydropteridine reductase  
RAB14, member RAS oncogene family  
RAB22A, member RAS oncogene family  
RAB27B, member RAS oncogene family  
ras-related C3 botulinum toxin substrate 1 (rho family, small GTP binding protein Rac1)  
RAD23 homolog A (*S. cerevisiae*)  
retinoic acid early transcript 1E  
RAP1, GTP-GDP dissociation stimulator 1  
retinoic acid receptor responder (tazarotene induced) 2  
retinoic acid receptor responder (tazarotene induced) 2  
Ras association (RalGDS/AF-6) domain family (N-terminal) member 7  
RNA binding motif protein 47  
retinol dehydrogenase 16 (all-trans)  
retinol dehydrogenase 16 (all-trans)  
retinol dehydrogenase 7  
RAD52 motif 1  
radixin  
radixin  
receptor accessory protein 6  
reelin  
REX4, RNA exonuclease 4 homolog (*S. cerevisiae*)  
RFNG O-fucosylpeptide 3-beta-N-acetylglucosaminyltransferase  
regucalcin (senescence marker protein-30)  
Rh family, B glycoprotein (gene/pseudogene)  
regulating synaptic membrane exocytosis 4  
required for meiotic nuclear division 1 homolog (*S. cerevisiae*)  
ribonuclease T2  
ring finger protein 13  
ring finger protein 130  
ring finger protein 167  
ring finger protein 170



ring finger protein 213  
ring finger protein 5  
arginyl aminopeptidase (aminopeptidase B)  
roadblock domain containing 3  
RAR-related orphan receptor B  
RAR-related orphan receptor C  
retinitis pigmentosa GTPase regulator interacting protein 1  
ribose 5-phosphate isomerase A  
ribosomal protein L22  
ribosomal protein S6 kinase, 90kDa, polypeptide 5  
retbindin  
reticulon 4  
receptor (chemosensory) transporter protein 4  
S100 calcium binding protein A1  
S100 calcium binding protein A1  
S100 calcium binding protein A10  
S100 calcium binding protein A10  
S100 calcium binding protein A13  
sarcosine dehydrogenase  
sarcosine dehydrogenase  
SH3-binding domain kinase 1  
sterol-C5-desaturase (ERG3 delta-5-desaturase homolog, *S. cerevisiae*)-like  
selenocysteine lyase  
sodium channel, nonvoltage-gated 1 alpha  
SCO cytochrome oxidase deficient homolog 2 (yeast)  
sterol carrier protein 2  
succinate dehydrogenase complex, subunit A, flavoprotein (Fp)  
succinate dehydrogenase complex, subunit A, flavoprotein (Fp)  
succinate dehydrogenase complex assembly factor 2  
succinate dehydrogenase complex, subunit B, iron sulfur (Ip)  
succinate dehydrogenase complex, subunit C, integral membrane protein, 15kDa  
succinate dehydrogenase complex, subunit C, integral membrane protein, 15kDa  
short chain dehydrogenase/reductase family 9C, member 7  
SEC14-like 2 (*S. cerevisiae*)  
SEC31 homolog A (*S. cerevisiae*)  
sel-1 suppressor of lin-12-like (*C. elegans*)  
selenium binding protein 1  
selenium binding protein 1  
selenoprotein K  
selenoprotein T  
Sep (O-phosphoserine) tRNA:Sec (selenocysteine) tRNA synthase  
small EDRK-rich factor 2  
small EDRK-rich factor 2  
small EDRK-rich factor 2  
small EDRK-rich factor 2  
serine hydrolase-like 2  
serine hydrolase-like 2  
serpin peptidase inhibitor, clade A (alpha-1 antitrypsin, antitrypsin), member 6  
serpin peptidase inhibitor, clade B (ovalbumin), member 1

serpin peptidase inhibitor, clade H (heat shock protein 47), member 1, (collagen binding protein 1)  
serpin peptidase inhibitor, clade H (heat shock protein 47), member 1, (collagen binding protein 1)  
sideroflexin 5  
serum/glucocorticoid regulated kinase 2  
NKF3 kinase family member  
SH3-binding domain protein 5-like  
SH3 domain containing 19  
serine hydroxymethyltransferase 1 (soluble)  
serine hydroxymethyltransferase 1 (soluble)  
serine hydroxymethyltransferase 1 (soluble)  
serine hydroxymethyltransferase 1 (soluble)  
serine hydroxymethyltransferase 2 (mitochondrial)  
serine hydroxymethyltransferase 2 (mitochondrial)  
serine hydroxymethyltransferase 2 (mitochondrial)  
serine hydroxymethyltransferase 2 (mitochondrial)  
sedoheptulokinase  
sialic acid acetyltransferase  
sialic acid acetyltransferase  
sialic acid acetyltransferase  
sirtuin (silent mating type information regulation 2 homolog) 5 (*S. cerevisiae*)  
solute carrier family 12 (potassium/chloride transporters), member 7  
solute carrier family 16, member 2 (monocarboxylic acid transporter 8)  
solute carrier family 16, member 2 (monocarboxylic acid transporter 8)  
solute carrier family 17 (sodium phosphate), member 3  
solute carrier family 18 (vesicular monoamine), member 1  
solute carrier family 1 (glial high affinity glutamate transporter), member 3  
solute carrier family 22 (organic cation transporter), member 1  
solute carrier family 22, member 18  
solute carrier family 22, member 18  
solute carrier family 22 (organic anion transporter), member 9  
solute carrier family 25 (mitochondrial carrier; oxoglutarate carrier), member 11  
solute carrier family 25, member 13 (citrin)  
solute carrier family 25 (mitochondrial carrier; ornithine transporter) member 15  
solute carrier family 25 (mitochondrial carrier; phosphate carrier), member 23  
solute carrier family 25, member 37  
solute carrier family 25, member 44  
solute carrier family 27 (fatty acid transporter), member 5  
solute carrier family 29 (nucleoside transporters), member 1  
solute carrier family 2 (facilitated glucose transporter), member 2  
solute carrier family 31 (copper transporters), member 1  
solute carrier family 31 (copper transporters), member 1  
solute carrier family 38, member 3  
solute carrier family 38, member 3  
solute carrier family 39 (zinc transporter), member 10  
solute carrier family 39 (zinc transporter), member 9  
solute carrier family 47, member 1  
solute carrier family 5 (sodium/glucose cotransporter), member 2  
solute carrier family 7 (cationic amino acid transporter, y<sup>+</sup> system), member 12  
solute carrier family 9 (sodium/hydrogen exchanger), member 3 regulator 1

solute carrier organic anion transporter family, member 2B1  
solute carrier organic anion transporter family, member 5A1  
SWI/SNF related, matrix associated, actin dependent regulator of chromatin, subfamily a, member 2  
SWI/SNF related, matrix associated, actin dependent regulator of chromatin, subfamily a, member 2  
SWI/SNF related, matrix associated, actin dependent regulator of chromatin, subfamily a-like 1  
SWI/SNF related, matrix associated, actin dependent regulator of chromatin, subfamily d, member 2  
SET and MYND domain containing 2  
SET and MYND domain containing 3  
synaptosomal-associated protein, 23kDa  
synaptosomal-associated protein, 23kDa  
sorting nexin 12  
sorting nexin 3  
sorting nexin 9  
suppressor of cytokine signaling 7  
superoxide dismutase 2, mitochondrial  
sorbin and SH3 domain containing 1  
sorbitol dehydrogenase  
sorbitol dehydrogenase  
SP100 nuclear antigen  
Sp5 transcription factor  
spinstar homolog 2 (Drosophila)  
secreted phosphoprotein 2, 24kDa  
sprouty-related, EVH1 domain containing 1  
sprouty-related, EVH1 domain containing 1  
sulfide quinone reductase-like (yeast)  
S1 RNA binding domain 1  
S1 RNA binding domain 1  
steroid-5-alpha-reductase, alpha polypeptide 1 (3-oxo-5 alpha-steroid delta 4-dehydrogenase alpha 1)  
steroid-5-alpha-reductase, alpha polypeptide 1 (3-oxo-5 alpha-steroid delta 4-dehydrogenase alpha 1)  
serine racemase  
serine racemase  
synovial sarcoma translocation gene on chromosome 18-like 1  
suppression of tumorigenicity 13 (colon carcinoma) (Hsp70 interacting protein)  
suppression of tumorigenicity 13 (colon carcinoma) (Hsp70 interacting protein)  
ST3 beta-galactoside alpha-2,3-sialyltransferase 6  
ST3 beta-galactoside alpha-2,3-sialyltransferase 6  
signal transducer and activator of transcription 1, 91kDa  
stress-induced-phosphoprotein 1  
stomatin  
stomatin  
stomatin  
stimulated by retinoic acid 13 homolog (mouse)  
succinate-CoA ligase, alpha subunit  
succinate-CoA ligase, GDP-forming, beta subunit  
succinate-CoA ligase, GDP-forming, beta subunit  
succinate receptor 1  
sulfotransferase family, cytosolic, 1C, member 2  
sulfotransferase family 3A, member 1  
sulfite oxidase

synaptotagmin-like 1  
TatD DNase domain containing 1  
TBC1 domain family, member 10A  
TBC1 domain family, member 10A  
TBC1 domain family, member 7  
TBC1 domain family, member 9B (with GRAM domain)  
transcription elongation factor A (SII), 3  
transcobalamin II; macrocytic anemia  
thyrotrophic embryonic factor  
testis expressed 264  
tissue factor pathway inhibitor 2  
threonine synthase-like 2 (*S. cerevisiae*)  
thyroid hormone responsive (SPOT14 homolog, rat)  
thyroid hormone responsive (SPOT14 homolog, rat)  
TIMP metalloproteinase inhibitor 2  
tubulointerstitial nephritis antigen-like 1  
thymidine kinase 1, soluble  
TLC domain containing 1  
TLC domain containing 2  
transmembrane BAX inhibitor motif containing 4  
transmembrane BAX inhibitor motif containing 6  
transmembrane channel-like 4  
transmembrane protein 106A  
transmembrane protein 134  
transmembrane protein 144  
transmembrane protein 14C  
transmembrane protein 184B  
transmembrane protein 195  
transmembrane protein 205  
transmembrane protein 25  
transmembrane protein 50A  
transmembrane protein 80  
transmembrane inner ear  
thymosin beta 10  
transmembrane and tetratricopeptide repeat containing 4  
transmembrane and ubiquitin-like domain containing 2  
tensin 3  
translocase of outer mitochondrial membrane 6 homolog (yeast)  
thiamin pyrophosphokinase 1  
tropomyosin 2 (beta)  
tropomyosin 2 (beta)  
transmembrane protein, adipocyte associated 1  
trafficking protein, kinesin binding 1  
trafficking protein, kinesin binding 1  
TNF receptor-associated protein 1  
TNF receptor-associated protein 1  
trafficking protein particle complex 4  
tripartite motif-containing 34

thiosulfate sulfurtransferase (rhodanese)  
tetratricopeptide repeat domain 23  
tetratricopeptide repeat domain 38  
tetratricopeptide repeat domain 39B  
transthyretin  
transthyretin  
tubulin, alpha 1c  
tubulin, alpha 3e  
tubulin, beta  
tubulin, beta 2C  
Tu translation elongation factor, mitochondrial  
thioredoxin 2  
thioredoxin 2  
thioredoxin reductase 2  
thioredoxin reductase 2  
tyrosine kinase 2  
trypsin domain containing 1  
trypsin domain containing 1  
ubiquitin-conjugating enzyme E2B (RAD6 homolog)  
ubiquitin-conjugating enzyme E2H (UBC8 homolog, yeast)  
ubiquitin-conjugating enzyme E2H (UBC8 homolog, yeast)  
ubiquitin-conjugating enzyme E2L 3  
ubiquitin-conjugating enzyme E2W (putative)  
ubiquitin family domain containing 1  
ubiquitin protein ligase E3 component n-recogin 3 (putative)  
UBX domain protein 11  
uridine-cytidine kinase 1  
UDP-glucose dehydrogenase  
UDP-glucose pyrophosphorylase 2  
UDP glucuronosyltransferase 2 family, polypeptide A3  
UDP glucuronosyltransferase 2 family, polypeptide B10  
UDP glucuronosyltransferase 2 family, polypeptide B15  
UDP glucuronosyltransferase 2 family, polypeptide B4  
UDP glycosyltransferase 3 family, polypeptide A2  
UDP glycosyltransferase 3 family, polypeptide A2  
UDP glycosyltransferase 3 family, polypeptide A2  
unc-51-like kinase 2 (C. elegans)  
unc-51-like kinase 2 (C. elegans)  
unc-51-like kinase 2 (C. elegans)  
uridine monophosphate synthetase  
uridine monophosphate synthetase  
urate oxidase (pseudogene)  
ureidopropionase, beta  
uridine phosphorylase 2

ubiquinol-cytochrome c reductase core protein I  
ubiquinol-cytochrome c reductase, Rieske iron-sulfur polypeptide 1  
urocanase domain containing 1  
uroporphyrinogen III synthase  
uronyl-2-sulfotransferase  
valyl-tRNA synthetase 2, mitochondrial (putative)  
voltage-dependent anion channel 1  
voltage-dependent anion channel 1  
very low density lipoprotein receptor  
vanin 1  
vanin 1  
vanin 2  
vacuolar protein sorting 25 homolog (*S. cerevisiae*)  
vacuolar protein sorting 41 homolog (*S. cerevisiae*)  
WD repeat domain 24  
WD repeat domain 48  
WD and tetratricopeptide repeats 1  
WEE1 homolog (*S. pombe*)  
WEE1 homolog (*S. pombe*)  
WAP, follistatin/kazal, immunoglobulin, kunitz and netrin domain containing 2  
Werner syndrome, RecQ helicase-like  
WW domain containing E3 ubiquitin protein ligase 1  
X (inactive)-specific transcript (non-protein coding)  
X-ray repair complementing defective repair in Chinese hamster cells 6  
zinc finger, BED-type containing 5  
zinc finger and BTB domain containing 20  
zinc finger and BTB domain containing 40  
zinc finger and BTB domain containing 7B  
zinc finger CCCH-type containing 8  
zinc finger CCCH-type, antiviral 1  
zinc finger, CCHC domain containing 14  
zinc finger, DHHC-type containing 20  
zinc finger, DHHC-type containing 9  
zinc finger protein 386 (Kruppel-like)  
zinc finger protein 54  
zinc finger protein 862  
zinc finger protein 871  
zinc finger protein 124  
zinc finger protein 124  
zinc finger protein 426  
zinc finger protein 692  
zinc finger protein 808

**mTR liver increased**  
**439 probe sets**

RIKEN cDNA 1110065P20 gene  
RIKEN cDNA 1700027F06 gene  
RIKEN cDNA 2210016H18 gene  
RIKEN cDNA 2310039H08 gene  
RIKEN cDNA 2310061J03 gene  
RIKEN cDNA 2900046L07 gene  
RIKEN cDNA 9130019O22 gene  
RIKEN cDNA A930036K24 gene  
ATP-binding cassette, sub-family A (ABC1), member 1  
actin binding LIM protein 1  
actin-related protein 10 homolog (*S. cerevisiae*)  
ADAM metalloproteinase domain 23  
aldo-keto reductase family 1, member B1 (aldose reductase)  
alkB, alkylation repair homolog 4 (*E. coli*)  
alpha-1-microglobulin/bikunin precursor  
anoctamin 10  
amyloid P component, serum  
APEX nuclease (multifunctional DNA repair enzyme) 1  
APEX nuclease (multifunctional DNA repair enzyme) 1  
apolipoprotein A-I  
apolipoprotein A-I  
apolipoprotein A-I  
apolipoprotein A-I  
adenine phosphoribosyltransferase  
AT rich interactive domain 1A (SWI-like)  
ariadne homolog 2 (*Drosophila*)  
ariadne homolog 2 (*Drosophila*)  
arylsulfatase G  
N-acylsphingosine amidohydrolase (acid ceramidase) 1  
ankyrin repeat and SOCS box-containing 7  
activating transcription factor 4 (tax-responsive enhancer element B67)  
ATPase, H<sup>+</sup> transporting, lysosomal 13kDa, V1 subunit G1  
UDP-Gal:betaGlcNAc beta 1,3-galactosyltransferase, polypeptide 1  
Bardet-Biedl syndrome 5  
bolA homolog 2 (*E. coli*)  
breast cancer metastasis suppressor 1  
chromosome 10 open reading frame 32  
chromosome 11 open reading frame 59  
chromosome 12 open reading frame 35  
chromosome 14 open reading frame 119  
chromosome 16 open reading frame 72  
chromosome 18 open reading frame 21  
chromosome 20 open reading frame 108  
chromosome 20 open reading frame 108  
complement component 3  
complement component 4B (Chido blood group)  
complement component 5  
chromosome 5 open reading frame 32

complement component 8, alpha polypeptide  
complement component 8, beta polypeptide  
chromosome 9 open reading frame 150  
calmodulin binding transcription activator 2  
calpain 10  
chromobox homolog 3 (HP1 gamma homolog, Drosophila)  
chemokine (C-C motif) ligand 6  
chemokine (C-C motif) ligand 6  
CD14 molecule  
CD302 molecule  
CDP-diacylglycerol--inositol 3-phosphatidyltransferase (phosphatidylinositol synthase)  
cyclin-dependent kinase 2 associated protein 1  
cyclin-dependent kinase 9  
CCAAT/enhancer binding protein (C/EBP), delta  
complement factor B  
complement factor H  
complement factor H  
complement factor I  
chromatin modifying protein 6  
chondroitin polymerizing factor 2  
chloride channel calcium activated 1  
chloride channel calcium activated 1  
catechol-O-methyltransferase  
ceruloplasmin (ferroxidase)  
ceruloplasmin (ferroxidase)  
ceruloplasmin (ferroxidase)  
ceruloplasmin (ferroxidase)  
carboxypeptidase B2 (plasma)  
copine VIII  
copine VIII  
copine VIII  
cleavage and polyadenylation specific factor 4, 30kDa  
CREB regulated transcription coactivator 2  
colony stimulating factor 2 receptor, beta, low-affinity (granulocyte-macrophage)  
cathepsin L2  
cullin 1  
cytochrome P450, family 3, subfamily A, polypeptide 7  
DEAD (Asp-Glu-Ala-Asp) box polypeptide 1  
DEAD (Asp-Glu-Ala-Asp) box polypeptide 39  
DEAD (Asp-Glu-Ala-Asp) box polypeptide 39  
DEAD (Asp-Glu-Ala-Asp) box polypeptide 5  
DENN/MADD domain containing 5A  
DIP2 disco-interacting protein 2 homolog A (Drosophila)  
DnaJ (Hsp40) homolog, subfamily C, member 16  
dystonin  
dynein, light chain, LC8-type 1  
dynein, light chain, LC8-type 1  
dynein, light chain, LC8-type 1



eukaryotic translation initiation factor 3, subunit F  
eukaryotic translation initiation factor 3, subunit I  
eukaryotic translation initiation factor 3, subunit I  
eukaryotic translation initiation factor 3, subunit M  
eukaryotic translation initiation factor 6  
energy homeostasis associated  
energy homeostasis associated  
ectonucleotide pyrophosphatase/phosphodiesterase 3  
enhancer of rudimentary homolog (Drosophila)  
ERO1-like (S. cerevisiae)  
ERO1-like (S. cerevisiae)  
epithelial splicing regulatory protein 2  
eukaryotic translation termination factor 1  
exosome component 1  
coagulation factor XII (Hageman factor)  
coagulation factor V (proaccelerin, labile factor)  
family with sequence similarity 133, member B  
F-box protein 3  
fibrinogen alpha chain  
fibrinogen beta chain  
fibrinogen gamma chain  
fibrinogen-like 1  
FK506 binding protein 15, 133kDa  
fibronectin 1  
furin (paired basic amino acid cleaving enzyme)  
growth arrest-specific 2 like 1  
growth arrest-specific 5 (non-protein coding)  
predicted gene 11428  
guanine nucleotide binding protein (G protein), alpha 13  
guanine nucleotide binding protein (G protein), beta polypeptide 2-like 1  
Golgi-localized protein  
glycosylphosphatidylinositol anchored high density lipoprotein binding protein 1  
G protein-coupled receptor kinase 6  
glutathione synthetase  
glutathione S-transferase pi 1  
GTF2I repeat domain containing 1  
H1 histone family, member 0  
histidine triad nucleotide binding protein 1  
hexokinase 1  
major histocompatibility complex, class I, B  
heterogeneous nuclear ribonucleoprotein A0  
heterogeneous nuclear ribonucleoprotein A3  
heterogeneous nuclear ribonucleoprotein K  
heterogeneous nuclear ribonucleoprotein K  
heterogeneous nuclear ribonucleoprotein K  
heterogeneous nuclear ribonucleoprotein D-like  
heterogeneous nuclear ribonucleoprotein D-like  
haptoglobin

immediate early response 3  
interferon induced transmembrane protein 1 (9-27)  
interferon induced transmembrane protein 2 (1-8D)  
interleukin 1 receptor, type I  
interleukin-1 receptor-associated kinase 3  
inter-alpha (globulin) inhibitor H3  
inter-alpha (globulin) inhibitor H4 (plasma Kallikrein-sensitive glycoprotein)  
influenza virus NS1A binding protein  
junctional adhesion molecule 2  
potassium channel, subfamily T, member 2  
KIAA0892  
KIAA0913  
klotho beta  
Kruppel-like factor 4 (gut)  
kininogen 1  
kininogen 1  
v-Ki-ras2 Kirsten rat sarcoma viral oncogene homolog  
lipopolysaccharide binding protein  
lamin B receptor  
lipocalin 2  
lipopolysaccharide-induced TNF factor  
ribosomal protein S18 pseudogene 5  
ribosomal protein L10 pseudogene 16  
ribosomal protein L13 pseudogene 12  
ribosomal protein L13 pseudogene 12  
hypothetical protein LOC552889  
latrophilin 2  
leucine-rich alpha-2-glycoprotein 1  
low density lipoprotein receptor-related protein associated protein 1  
leucine rich repeat containing 42  
LSM8 homolog, U6 small nuclear RNA associated (*S. cerevisiae*)  
lymphotoxin beta receptor (TNFR superfamily, member 3)  
LYR motif containing 4  
membrane associated guanylate kinase, WW and PDZ domain containing 3  
MAK16 homolog (*S. cerevisiae*)  
microtubule-associated protein 1 light chain 3 beta  
mitogen-activated protein kinase kinase kinase 7 interacting protein 2  
mitogen-activated protein kinase kinase kinase kinase 4  
MAP7 domain containing 1  
mediator complex subunit 15  
methyltransferase like 1  
matrix metalloproteinase 14 (membrane-inserted)  
MAS-related GPR, member A4  
methylthioribose-1-phosphate isomerase homolog (*S. cerevisiae*)  
male-specific lethal 1 homolog (*Drosophila*)  
methionine sulfoxide reductase B3  
metallothionein 1E

nucleosome assembly protein 1-like 1  
nucleosome assembly protein 1-like 1  
nucleosome assembly protein 1-like 1  
nucleolin  
nuclear factor of kappa light polypeptide gene enhancer in B-cells inhibitor, zeta  
NHP2 ribonucleoprotein homolog (yeast)  
NHP2 non-histone chromosome protein 2-like 1 (*S. cerevisiae*)  
NmrA-like family domain containing 1  
Notch homolog 4 (*Drosophila*)  
5'-nucleotidase, cytosolic II  
neurotrophin 3  
nucleotide binding protein 1 (MinD homolog, *E. coli*)  
nucleotide binding protein 1 (MinD homolog, *E. coli*)  
nudix (nucleoside diphosphate linked moiety X)-type motif 18  
nudix (nucleoside diphosphate linked moiety X)-type motif 4  
orosomuroid 1  
orosomuroid 2  
oxysterol binding protein-like 9  
ovarian tumor suppressor candidate 2  
poly (ADP-ribose) polymerase 2  
poly(rC) binding protein 2  
poly(rC) binding protein 4  
polycomb group ring finger 6  
6-phosphofructo-2-kinase/fructose-2,6-biphosphatase 4  
phosphoglycolate phosphatase  
PHD finger protein 20-like 1  
phosphorylase kinase, gamma 2 (testis)  
protein inhibitor of activated STAT, 2  
phosphatidylserine decarboxylase  
phosphatidylinositol transfer protein, beta  
phospholipase A2, group VII (platelet-activating factor acetylhydrolase, plasma)  
plexin C1  
polynucleotide kinase 3'-phosphatase  
phosphatidic acid phosphatase type 2A  
protoporphyrinogen oxidase  
protein phosphatase 1, regulatory (inhibitor) subunit 2  
protein phosphatase 2 (formerly 2A), regulatory subunit A, alpha isoform  
protein phosphatase 3 (formerly 2B), catalytic subunit, alpha isoform  
protein phosphatase 4, regulatory subunit 2  
prolyl endopeptidase-like  
proteoglycan 4  
protein kinase C, eta  
protein tyrosine phosphatase type IVA, member 2  
protein tyrosine phosphatase, non-receptor type 3  
pregnancy-zone protein  
quaking homolog, KH domain RNA binding (mouse)  
quaking homolog, KH domain RNA binding (mouse)

receptor accessory protein 5  
receptor accessory protein 5  
RALBP1 associated Eps domain containing 1  
Rab interacting lysosomal protein-like 2  
ribonuclease, RNase A family, 4  
ribonuclease H2, subunit A  
ring finger protein 138  
retinitis pigmentosa 9 (autosomal dominant)  
RNA polymerase II associated protein 3  
ribosomal protein L13a  
ribosomal protein L13a  
ribosomal protein L13a  
ribosomal protein L13a  
ribosomal protein L14  
ribosomal protein L14  
ribosomal protein L14  
ribosomal protein L14  
ribosomal protein L17  
ribosomal protein L17  
ribosomal protein L18  
ribosomal protein L18a  
ribosomal protein L19  
ribosomal protein L22  
ribosomal protein L23a  
ribosomal protein L23a  
ribosomal protein L23a  
ribosomal protein L24  
ribosomal protein L26  
ribosomal protein L26  
ribosomal protein L27a  
ribosomal protein L28  
ribosomal protein L30  
ribosomal protein L34  
ribosomal protein L34  
ribosomal protein L35  
ribosomal protein L37a  
ribosomal protein L37a  
ribosomal protein L38  
ribosomal protein L39  
ribosomal protein L41  
ribosomal protein L6  
ribosomal protein L7  
ribosomal protein L7A

ribosomal protein S10  
ribosomal protein S11  
ribosomal protein S12  
ribosomal protein S15A  
ribosomal protein S16  
ribosomal protein S16  
ribosomal protein S19  
ribosomal protein S20  
ribosomal protein S20  
ribosomal protein S21  
ribosomal protein S21  
ribosomal protein S21  
ribosomal protein S21  
ribosomal protein S24  
ribosomal protein S25  
ribosomal protein S26  
ribosomal protein S27A  
ribosomal protein S28  
ribosomal protein S28  
ribosomal protein S28  
ribosomal protein S29  
ribosomal protein S3  
ribosomal protein S3A  
ribosomal protein S5  
ribosomal protein S6  
ribosomal protein S6  
ribosomal protein S7  
ribosomal protein S9  
ribosomal protein SA  
ribosome binding protein 1 homolog 180kDa (dog)  
ribosomal RNA processing 1 homolog (*S. cerevisiae*)  
serum amyloid A2  
serum amyloid A2  
SAM and SH3 domain containing 1  
scavenger receptor class B, member 1  
scavenger receptor class B, member 1  
scavenger receptor class B, member 1  
SCY1-like 3 (*S. cerevisiae*)  
SEC13 homolog (*S. cerevisiae*)  
Sec61 alpha 1 subunit (*S. cerevisiae*)  
selenophosphate synthetase 1  
septin 5  
serpin peptidase inhibitor, clade A (alpha-1 antiproteinase, antitrypsin), member 10  
serpin peptidase inhibitor, clade A (alpha-1 antiproteinase, antitrypsin), member 11  
serine (or cysteine) peptidase inhibitor, clade A, member 3K  
serine (or cysteine) peptidase inhibitor, clade A, member 3K  
serine (or cysteine) peptidase inhibitor, clade A, member 3M

solute carrier family 35 (UDP-glucuronic acid/UDP-N-acetylgalactosamine dual transporter), member D1  
solute carrier family 39 (zinc transporter), member 14  
solute carrier family 3 (cystine, dibasic and neutral amino acid transporters, activator of cystine, dibasic and  
solute carrier family 41, member 1  
solute carrier family 41, member 2  
solute carrier family 6 (neurotransmitter transporter, creatine), member 8  
solute carrier family 7 (cationic amino acid transporter, y+ system), member 7  
SMAD family member 4  
SMAD family member 4  
structural maintenance of chromosomes 6  
sphingomyelin phosphodiesterase 1, acid lysosomal  
small nuclear ribonucleoprotein polypeptide B"  
sorting nexin 24  
sorting nexin 7  
spermatogenesis associated, serine-rich 2  
serglycin  
signal recognition particle receptor (docking protein)  
single-stranded DNA binding protein 2  
structure specific recognition protein 1  
six transmembrane epithelial antigen of the prostate 2  
suppressor of Ty 16 homolog (S. cerevisiae)  
transforming, acidic coiled-coil containing protein 1  
transforming, acidic coiled-coil containing protein 1  
transgelin 2  
TatD DNase domain containing 2  
transducin (beta)-like 3  
testis-specific kinase 1  
transferrin receptor 2  
transferrin receptor 2  
THO complex 3  
thyroid hormone receptor associated protein 3  
thymidine kinase 2, mitochondrial  
transmembrane 4 L six family member 4  
transmembrane emp24 protein transport domain containing 7  
transmembrane emp24 protein transport domain containing 7  
transmembrane emp24 protein transport domain containing 7  
transmembrane protein 165  
transmembrane protein 176B  
transmembrane protein 38B  
transmembrane protein 62  
transmembrane protein 71  
transmembrane protein 82  
TMEM9 domain family, member B  
tripartite motif-containing 2  
tripartite motif-containing 2  
tripartite motif-containing 2  
tripartite motif-containing 28

translocator protein (18kDa)  
translocator protein (18kDa)  
tetratricopeptide repeat domain 1  
TWIST neighbor  
ubiquitin-conjugating enzyme E2E 3 (UBC4/5 homolog, yeast)  
unconventional SNARE in the ER 1 homolog (*S. cerevisiae*)  
unconventional SNARE in the ER 1 homolog (*S. cerevisiae*)  
upstream transcription factor 2, c-fos interacting  
ubiquitin specific peptidase 53  
vesicle-associated membrane protein 8 (endobrevin)  
vacuolar protein sorting 54 homolog (*S. cerevisiae*)  
vitronectin  
WW domain binding protein 5  
WD repeat domain 33  
WW and C2 domain containing 2

## Supp Table 5

### mTERC heart decreased

#### Entrez Gene Name

RIKEN cDNA 1700020114 gene  
 RIKEN cDNA 1700020114 gene  
 RIKEN cDNA 1700020114 gene  
 RIKEN cDNA 1700113I22 gene  
 RIKEN cDNA 2310009A05 gene  
 RIKEN cDNA 2310014D11 gene  
 RIKEN cDNA 2310029O18 gene  
 RIKEN cDNA 4632419I22 gene  
 RIKEN cDNA 4933404G15 gene  
 RIKEN cDNA 5730416F02 gene  
 RIKEN cDNA 6720475J19 gene  
 RIKEN cDNA 6720475J19 gene  
 RIKEN cDNA 8430436N08 gene  
 RIKEN cDNA 9130004J05 gene  
 RIKEN cDNA 9130017K11 gene  
 RIKEN cDNA 9430087J23 gene  
 hypothetical protein 9530028C05  
 angio-associated, migratory cell protein  
 ATP-binding cassette, sub-family A (ABC1), member 9  
 ATP-binding cassette, sub-family B (MDR/TAP), member 10  
 ATP-binding cassette, sub-family C (CFTR/MRP), member 5  
 ATP-binding cassette, sub-family C (CFTR/MRP), member 9  
 ATP-binding cassette, sub-family C (CFTR/MRP), member 9  
 acyl-Coenzyme A dehydrogenase, C-2 to C-3 short chain  
 acetyl-Coenzyme A acetyltransferase 1  
 acyl-Coenzyme A binding domain containing 3  
 actin, alpha, cardiac muscle 1  
 actin, gamma 2, smooth muscle, enteric  
 adenosine deaminase-like  
 ADAM metalloproteinase with thrombospondin type 1 motif, 9  
 acireductone dioxygenase 1  
 acireductone dioxygenase 1  
 ADP-ribosylarginine hydrolase  
 1-acylglycerol-3-phosphate O-acyltransferase 6 (lysophosphatidic acid acyltransferase, zeta)  
 axin interactor, dorsalization associated  
 adenylate kinase 1  
 adenylate kinase 3  
 adenylate kinase 3-like 1  
 A kinase (PRKA) anchor protein 10  
 aldo-keto reductase family 1, member C-like 2  
 aldehyde dehydrogenase 4 family, member A1  
 asparagine-linked glycosylation 13 homolog (*S. cerevisiae*)  
 alkaline phosphatase, liver/bone/kidney  
 adenosylmethionine decarboxylase 1  
 anaphase promoting complex subunit 1  
 ankyrin 1, erythrocytic  
 ankylosis, progressive homolog (mouse)



ankyrin repeat domain 23  
ankyrin repeat domain 40  
ankyrin repeat domain 40  
ankyrin repeat domain 45  
anoctamin 8  
anthrax toxin receptor 2  
annexin A2  
annexin A6  
annexin A7  
adaptor-related protein complex 1, sigma 1 subunit  
adaptor-related protein complex 3, mu 1 subunit  
amyloid beta (A4) precursor protein-binding, family A, member 3  
apelin receptor  
apelin receptor  
amyloid beta (A4) precursor-like protein 2  
apolipoprotein A-I binding protein  
apolipoprotein L 9b  
apolipoprotein O-like  
ArfGAP with RhoGAP domain, ankyrin repeat and PH domain 1  
ADP-ribosylation factor 4  
ADP-ribosylation factor 4  
ariadne homolog, ubiquitin-conjugating enzyme E2 binding protein, 1 (Drosophila)  
ADP-ribosylation factor-like 6 interacting protein 1  
ADP-ribosylation-like factor 6 interacting protein 5  
armadillo repeat containing, X-linked 3  
cAMP-regulated phosphoprotein, 19kDa  
ankyrin repeat and SOCS box-containing 10  
ankyrin repeat and SOCS box-containing 2  
aspartoacylase (Canavan disease)  
aspartate beta-hydroxylase  
asporin  
ATG4 autophagy related 4 homolog D (S. cerevisiae)  
atlastin GTPase 2  
ATPase, Na<sup>+</sup>/K<sup>+</sup> transporting, alpha 1 polypeptide  
ATPase, H<sup>+</sup> transporting, lysosomal V0 subunit a2  
ataxin 2  
ataxin 2-like  
expressed sequence AW112010  
antizyme inhibitor 1  
RIKEN cDNA B230220N19 gene  
RIKEN cDNA B230308N11 gene  
beta-1,3-N-acetylgalactosaminyltransferase 2  
RIKEN cDNA B430203I24 gene  
BCL2-antagonist/killer 1  
bromodomain adjacent to zinc finger domain, 1B  
beclin 1, autophagy related  
bicaudal D homolog 2 (Drosophila)  
bicaudal D homolog 2 (Drosophila)  
basic leucine zipper nuclear factor 1  
bone morphogenetic protein 1  
BCL2/adenovirus E1B 19kDa interacting protein 2

BCL2/adenovirus E1B 19kDa interacting protein 2  
bolA homolog 3 (E. coli)  
chromosome 11 open reading frame 54  
chromosome 11 open reading frame 84  
chromosome 13 open reading frame 31  
chromosome 14 open reading frame 180  
chromosome 14 open reading frame 37  
chromosome 16 open reading frame 61  
chromosome 16 open reading frame 7  
chromosome 17 open reading frame 39  
chromosome 17 open reading frame 39  
chromosome 17 open reading frame 95  
chromosome 18 open reading frame 10  
chromosome 18 open reading frame 19  
chromosome 18 open reading frame 19  
chromosome 19 open reading frame 12  
chromosome 19 open reading frame 12  
chromosome 19 open reading frame 22  
chromosome 19 open reading frame 52  
chromosome 1 open reading frame 123  
chromosome 1 open reading frame 63  
chromosome 1 open reading frame 93  
chromosome 20 open reading frame 194  
chromosome 2 open reading frame 43  
chromosome 5 open reading frame 13  
chromosome 5 open reading frame 13  
chromosome 6 open reading frame 182  
expressed sequence C80171  
chromosome 9 open reading frame 78  
chromosome 9 open reading frame 86  
calcium channel, voltage-dependent, T type, alpha 1G subunit  
calcium channel, voltage-dependent, alpha 2/delta subunit 4  
calcium channel, voltage-dependent, beta 2 subunit  
calcium channel, voltage-dependent, beta 2 subunit  
calcium channel, voltage-dependent, gamma subunit 2  
calmodulin 1 (phosphorylase kinase, delta)  
calcium/calmodulin-dependent protein kinase I  
cullin-associated and neddylation-dissociated 2 (putative)  
calnexin  
CAP, adenylate cyclase-associated protein, 2 (yeast)  
calpain 1, (mu/l) large subunit  
calpain 3, (p94)  
cell cycle associated protein 1  
cell cycle associated protein 1  
cysteinyl-tRNA synthetase 2, mitochondrial (putative)  
caspase 3, apoptosis-related cysteine peptidase  
caspase 8, apoptosis-related cysteine peptidase  
calpastatin  
caveolin 1, caveolae protein, 22kDa  
coiled-coil domain containing 117  
coiled-coil domain containing 21

coiled-coil domain containing 47  
coiled-coil domain containing 56  
coiled-coil domain containing 69  
coiled-coil domain containing 91  
coiled-coil domain containing 91  
chemokine (C-C motif) ligand 21  
cyclin D1  
cyclin D1  
cyclin D2  
cyclin D2  
cyclin D3  
cyclin G1  
chaperonin containing TCP1, subunit 3 (gamma)  
CD34 molecule  
CD59a antigen  
CD93 molecule  
CD93 molecule  
CD97 molecule  
CD99 molecule-like 2  
CD99 molecule-like 2  
CD99 molecule-like 2  
cytidine and dCMP deaminase domain containing 1  
CDC42 effector protein (Rho GTPase binding) 2  
cyclin-dependent kinase 2 associated protein 2  
CDP-diacylglycerol synthase (phosphatidate cytidylyltransferase) 2  
centromere protein T  
centrosomal protein 76kDa  
carboxylesterase 1 (monocyte/macrophage serine esterase 1)  
cofilin 1 (non-muscle)  
CASP8 and FADD-like apoptosis regulator  
chondroadherin-like  
coiled-coil-helix-coiled-coil-helix domain containing 3  
chitinase domain containing 1  
chromatin modifying protein 4C  
chimerin (chimaerin) 1  
creatine kinase, brain  
cytoplasmic linker associated protein 1  
claudin domain containing 1  
chloride intracellular channel 4  
CAP-GLY domain containing linker protein 1  
ClpB caseinolytic peptidase B homolog (E. coli)  
chemokine-like receptor 1  
cornichon homolog (Drosophila)  
2',3'-cyclic nucleotide 3' phosphodiesterase  
component of oligomeric golgi complex 8  
collagen, type XIV, alpha 1  
collagen, type XV, alpha 1  
collagen, type I, alpha 1  
collagen, type I, alpha 1  
collagen, type I, alpha 2  
collagen, type III, alpha 1

collagen, type IV, alpha 1  
collagen, type IV, alpha 5  
collagen, type V, alpha 2  
collagen, type VI, alpha 1  
collagen, type VI, alpha 2  
collagen, type VI, alpha 2  
collagen, type VI, alpha 3  
collectin sub-family member 11  
collectin sub-family member 11  
coronin 7  
COX16 cytochrome c oxidase assembly homolog (*S. cerevisiae*)  
carboxypeptidase D  
cytoplasmic polyadenylated homeobox  
cleavage and polyadenylation specific factor 6, 68kDa  
corticotropin releasing hormone receptor 1  
v-crk sarcoma virus CT10 oncogene homolog (avian)  
cartilage associated protein  
crystallin, zeta (quinone reductase)-like 1  
casein kinase 2, alpha 1 polypeptide  
casein kinase 2, alpha 1 polypeptide  
catenin (cadherin-associated protein), beta 1, 88kDa  
cathepsin B  
coxsackie virus and adenovirus receptor  
cytochrome c, somatic  
cytoplasmic FMR1 interacting protein 2  
cytoplasmic FMR1 interacting protein 2  
cytoglobin  
cysteine/histidine-rich 1  
cytochrome P450, family 7, subfamily A, polypeptide 1  
DNA segment, Chr 14, ERATO Doi 668, expressed  
disabled homolog 2, mitogen-responsive phosphoprotein (*Drosophila*)  
defender against cell death 1  
diacylglycerol lipase, alpha  
death-associated protein  
dual adaptor of phosphotyrosine and 3-phosphoinositides  
drebrin-like  
DDB1 and CUL4 associated factor 5  
dephospho-CoA kinase domain containing  
dynactin 5 (p25)  
DCN1, defective in cullin neddylation 1, domain containing 1 (*S. cerevisiae*)  
DCN1, defective in cullin neddylation 1, domain containing 2 (*S. cerevisiae*)  
dimethylarginine dimethylaminohydrolase 1  
DNA-damage-inducible transcript 3  
degenerative spermatocyte homolog 1, lipid desaturase (*Drosophila*)  
DNA fragmentation factor, 45kDa, alpha polypeptide  
7-dehydrocholesterol reductase  
dehydrogenase/reductase (SDR family) member 1  
dehydrogenase/reductase (SDR family) member 4  
DnaJ (Hsp40) homolog, subfamily A, member 1  
DnaJ (Hsp40) homolog, subfamily A, member 3  
DnaJ (Hsp40) homolog, subfamily A, member 4

DnaJ (Hsp40) homolog, subfamily A, member 4  
DnaJ (Hsp40) homolog, subfamily B, member 4  
double C2-like domains, beta  
dolichol kinase  
DPH3, KTI11 homolog (*S. cerevisiae*)  
desmocollin 2  
dystrobrevin, alpha  
deoxythymidylate kinase (thymidylate kinase)  
dual specificity phosphatase 19  
dynein, cytoplasmic 1, light intermediate chain 2  
dynein, light chain, Tctex-type 3  
dysferlin, limb girdle muscular dystrophy 2B (autosomal recessive)  
EF-hand calcium binding domain 2  
EF-hand domain family, member D1  
predicted gene, EG214403  
EGF-like-domain, multiple 7  
EGF-like-domain, multiple 7  
egl nine homolog 3 (*C. elegans*)  
egl nine homolog 3 (*C. elegans*)  
EH domain binding protein 1-like 1  
eukaryotic translation initiation factor 2C, 4  
eukaryotic translation initiation factor 3, subunit A  
eukaryotic translation initiation factor 4B  
eukaryotic translation initiation factor 4E  
eukaryotic translation initiation factor 4E  
elaC homolog 1 (*E. coli*)  
ectonucleotide pyrophosphatase/phosphodiesterase 5 (putative function)  
ectonucleoside triphosphate diphosphohydrolase 5  
erythrocyte membrane protein band 4.1-like 2  
ELKS/RAB6-interacting/CAST family member 1  
endoplasmic reticulum-golgi intermediate compartment (ERGIC) 1  
ERGIC and golgi 3  
esterase D/formylglutathione hydrolase  
ethylmalonic encephalopathy 1  
v-ets erythroblastosis virus E26 oncogene homolog 1 (avian)  
fatty acid binding protein 3, muscle and heart (mammary-derived growth inhibitor)  
fatty acid binding protein 5 (psoriasis-associated)  
fumarylacetoacetate hydrolase domain containing 1  
family with sequence similarity 101, member B  
family with sequence similarity 101, member B  
family with sequence similarity 111, member A  
family with sequence similarity 120A  
family with sequence similarity 63, member B  
family with sequence similarity 81, member A  
filamin binding LIM protein 1  
fibrillin 1  
F-box protein 3  
fibroblast growth factor 1 (acidic)  
FGFR1 oncogene partner 2  
four and a half LIM domains 2

FK506 binding protein 1A, 12kDa  
FK506 binding protein 1A, 12kDa  
FK506 binding protein 4, 59kDa  
FAD1 flavin adenine dinucleotide synthetase homolog (*S. cerevisiae*)  
filamin B, beta  
filamin C, gamma  
flotillin 1  
fascin homolog 1, actin-bundling protein (*Strongylocentrotus purpuratus*)  
fascin homolog 1, actin-bundling protein (*Strongylocentrotus purpuratus*)  
follistatin-like 1  
FUN14 domain containing 1  
FYN oncogene related to SRC, FGR, YES  
G2/M-phase specific E3 ubiquitin ligase  
GA binding protein transcription factor, alpha subunit 60kDa  
UDP-N-acetyl-alpha-D-galactosamine:polypeptide N-acetylgalactosaminyltransferase 11 (GalNAc-T11)  
guanidinoacetate N-methyltransferase  
glyceraldehyde-3-phosphate dehydrogenase, spermatogenic  
GTPase activating Rap/RanGAP domain-like 1  
golgi-specific brefeldin A resistant guanine nucleotide exchange factor 1  
glucokinase (hexokinase 4)  
glycerophosphodiester phosphodiesterase domain containing 1  
G elongation factor, mitochondrial 2  
growth hormone inducible transmembrane protein  
GTPase, IMAP family member 4  
glutaminase  
glutamate dehydrogenase 1  
predicted gene 3426  
predicted gene 4076  
glia maturation factor, beta  
guanine nucleotide binding protein (G protein), alpha activating activity polypeptide, olfactory type  
GNAS complex locus  
guanine nucleotide binding protein (G protein), beta polypeptide 4  
guanine nucleotide binding protein (G protein), beta polypeptide 4  
guanine nucleotide binding protein (G protein), gamma 11  
guanine nucleotide binding protein (G protein), gamma 4  
GC-rich promoter binding protein 1  
glycoprotein M6B  
G protein-coupled receptor 153  
glutamic-pyruvate transaminase (alanine aminotransferase)  
glutamic pyruvate transaminase (alanine aminotransferase) 2  
glutamic pyruvate transaminase (alanine aminotransferase) 2  
growth factor receptor-bound protein 10  
growth factor receptor-bound protein 2  
glutathione S-transferase alpha 5  
general transcription factor IIH, polypeptide 4, 52kDa  
HCLS1 associated protein X-1  
holocytochrome c synthase (cytochrome c heme-lyase)  
HEAT repeat containing 6  
HEAT repeat containing 7B1  
homeodomain interacting protein kinase 2

histone cluster 1, H1e  
histone cluster 1, H2bl  
histone cluster 3, H2a  
histone cluster 3, H2a  
histone cluster 3, H3  
human immunodeficiency virus type I enhancer binding protein 2  
Holliday junction recognition protein  
HOP homeobox  
HOP homeobox  
HRAS-like suppressor  
HRAS-like suppressor  
heat shock factor binding protein 1  
hydroxysteroid (17-beta) dehydrogenase 12  
heat shock protein 90kDa alpha (cytosolic), class A member 1  
heat shock protein 90kDa alpha (cytosolic), class B member 1  
heat shock 70kDa protein 12A  
heat shock 70kDa protein 4  
heat shock 70kDa protein 4-like  
heat shock 70kDa protein 8  
heat shock 27kDa protein 3  
heat shock protein, alpha-crystallin-related, B6  
heat shock 60kDa protein 1 (chaperonin)  
hyaluronoglucosaminidase 2  
intercellular adhesion molecule 2  
interferon activated gene 203  
interferon gamma receptor 2 (interferon gamma transducer 1)  
intraflagellar transport 122 homolog (Chlamydomonas)  
intraflagellar transport 122 homolog (Chlamydomonas)  
insulin-like growth factor binding protein 7  
immunoglobulin superfamily, member 1  
interleukin 13 receptor, alpha 1  
interleukin 13 receptor, alpha 1  
interleukin 2 receptor, gamma (severe combined immunodeficiency)  
inhibitor of growth family, member 4  
inositol polyphosphate phosphatase-like 1  
insulin induced gene 2  
integrator complex subunit 7  
IQ motif and Sec7 domain 2  
iron-sulfur cluster assembly 1 homolog (S. cerevisiae)-like  
immunoglobulin superfamily containing leucine-rich repeat  
isochorismatase domain containing 1  
isochorismatase domain containing 1  
integrin alpha FG-GAP repeat containing 1  
integrin, alpha 1  
integrin, alpha 6  
integrin, alpha 6  
integrin, alpha 9  
integrin, beta 1 (fibronectin receptor, beta polypeptide, antigen CD29 includes MDF2, MSK12)  
integrin, beta 1 (fibronectin receptor, beta polypeptide, antigen CD29 includes MDF2, MSK12)  
integrin, beta 1 (fibronectin receptor, beta polypeptide, antigen CD29 includes MDF2, MSK12)

inositol 1,4,5-triphosphate receptor, type 2  
intersectin 1 (SH3 domain protein)  
intersectin 2  
izumo sperm-egg fusion 1  
Janus kinase 3  
Josephin domain containing 2  
jun oncogene  
potassium voltage-gated channel, Shal-related subfamily, member 2  
potassium voltage-gated channel, subfamily G, member 2  
potassium inwardly-rectifying channel, subfamily J, member 3  
potassium inwardly-rectifying channel, subfamily J, member 3  
potassium channel tetramerisation domain containing 10  
KIAA0226  
KIAA0427  
KIAA1033  
KIT ligand  
kinesin light chain 1  
kinesin light chain 4  
kelch-like 6 (Drosophila)  
karyopherin alpha 1 (importin alpha 5)  
karyopherin alpha 1 (importin alpha 5)  
karyopherin alpha 3 (importin alpha 4)  
karyopherin (importin) beta 1  
laminin, alpha 4  
lysosomal protein transmembrane 4 alpha  
limb bud and heart development homolog (mouse)  
lysocardiolipin acyltransferase 1  
lactate dehydrogenase D  
lactate dehydrogenase D  
leucine zipper-EF-hand containing transmembrane protein 2  
lectin, galactoside-binding, soluble, 1  
lectin, galactoside-binding, soluble, 7  
lectin, galactoside-binding, soluble, 9B  
LIM and senescent cell antigen-like domains 1  
lectin, mannose-binding, 1  
lectin, mannose-binding 2  
lipase maturation factor 1  
similar to mCG115122  
hepatocellular carcinoma-associated gene TD26  
cell division cycle 42 pseudogene  
loricrin  
lysyl oxidase-like 1  
lysyl oxidase-like 2  
lysophosphatidic acid receptor 6  
lysophosphatidylcholine acyltransferase 2  
lysophosphatidylglycerol acyltransferase 1  
leucine rich repeat containing 27  
leucine rich repeat containing 39  
leucine-rich repeats and transmembrane domains 1  
limbic system-associated membrane protein



lumican  
latexin  
Ly6/neurotoxin 1  
microtubule-actin crosslinking factor 1  
MAK10 homolog, amino-acid N-acetyltransferase subunit (*S. cerevisiae*)  
microtubule-associated protein 4  
MAP7 domain containing 1  
microtubule-associated protein, RP/EB family, member 2  
microtubule-associated protein tau  
myristoylated alanine-rich protein kinase C substrate  
Mdm2 p53 binding protein homolog (mouse)  
malic enzyme 1, NADP(+)-dependent, cytosolic  
male-enhanced antigen 1  
male-enhanced antigen 1  
mediator complex subunit 11  
mediator complex subunit 19  
mediator complex subunit 20  
maternally expressed 3  
mesenchyme homeobox 1  
methyltransferase 10 domain containing  
microfibrillar associated protein 5  
mannosyl (alpha-1,6-)-glycoprotein beta-1,2-N-acetylglucosaminyltransferase  
mannosyl (alpha-1,6-)-glycoprotein beta-1,6-N-acetyl-glucosaminyltransferase  
O-6-methylguanine-DNA methyltransferase  
MYC induced nuclear antigen  
malectin  
myeloid leukemia factor 2  
monocyte to macrophage differentiation-associated  
matrix metalloproteinase 2 (gelatinase A, 72kDa gelatinase, 72kDa type IV collagenase)  
MOB1, Mps One Binder kinase activator-like 1B (yeast)  
mannosyl-oligosaccharide glucosidase  
mitochondrial ribosomal protein L19  
mitochondrial ribosomal protein L34  
mitochondrial ribosomal protein L42  
mitochondrial ribosomal protein L50  
mitochondrial ribosomal protein L51  
membrane-spanning 4-domains, subfamily A, member 4B  
msh homeobox 1  
mitochondrial carrier homolog 1 (*C. elegans*)  
myotubularin related protein 6  
mitochondrial protein 18 kDa  
myotrophin  
mitochondrial tumor suppressor 1  
mitochondrial tumor suppressor 1  
MUS81 endonuclease homolog (*S. cerevisiae*)  
myeloid-associated differentiation marker  
myeloid-associated differentiation marker

myosin, heavy chain 9, non-muscle  
myosin XVIII A  
nucleosome assembly protein 1-like 1  
nuclear prelamin A recognition factor  
nuclear prelamin A recognition factor  
N-acetyltransferase 12 (GCN5-related, putative)  
neighbor of BRCA1 gene 1  
neutral cholesterol ester hydrolase 1  
NCK adaptor protein 1  
nuclear receptor co-repressor 2  
NADH dehydrogenase (ubiquinone) 1 alpha subcomplex, 3, 9kDa  
NADH dehydrogenase (ubiquinone) 1 alpha subcomplex, 3, 9kDa  
NADH dehydrogenase (ubiquinone) 1 alpha subcomplex, 4-like 2  
NADH dehydrogenase (ubiquinone) 1 alpha subcomplex, assembly factor 2  
NADH dehydrogenase (ubiquinone) 1 alpha subcomplex, assembly factor 3  
NADH dehydrogenase (ubiquinone) Fe-S protein 5, 15kDa (NADH-coenzyme Q reductase)  
NADH dehydrogenase (ubiquinone) Fe-S protein 8, 23kDa (NADH-coenzyme Q reductase)  
NADH dehydrogenase (ubiquinone) Fe-S protein 8, 23kDa (NADH-coenzyme Q reductase)  
NADH dehydrogenase (ubiquinone) flavoprotein 2, 24kDa  
nestin  
nuclear factor of activated T-cells, cytoplasmic, calcineurin-dependent 2  
nuclear transcription factor Y, alpha  
non imprinted in Prader-Willi/Angelman syndrome 2  
Na<sup>+</sup>/K<sup>+</sup> transporting ATPase interacting 1  
Na<sup>+</sup>/K<sup>+</sup> transporting ATPase interacting 1  
nicotinamide nucleotide adenyltransferase 1  
non-POU domain containing, octamer-binding  
Notch homolog 4 (Drosophila)  
neuropilin 2  
neuropilin 2  
nudix (nucleoside diphosphate linked moiety X)-type motif 19  
nudix (nucleoside diphosphate linked moiety X)-type motif 3  
nudix (nucleoside diphosphate linked moiety X)-type motif 4  
nudix (nucleoside diphosphate linked moiety X)-type motif 8  
nuclear protein, transcriptional regulator, 1  
2'-5'-oligoadenylate synthetase 2, 69/71kDa  
ornithine decarboxylase antizyme 2  
osteoglycin  
O-linked N-acetylglucosamine (GlcNAc) transferase (UDP-N-acetylglucosamine:polypeptide-  
O-linked N-acetylglucosamine (GlcNAc) transferase (UDP-N-acetylglucosamine:polypeptide-  
O-linked N-acetylglucosamine (GlcNAc) transferase (UDP-N-acetylglucosamine:polypeptide-  
O-sialoglycoprotein endopeptidase-like 1  
oligosaccharyltransferase complex subunit  
oxidase (cytochrome c) assembly 1-like  
3-oxoacid CoA transferase 1  
oxidation resistance 1  
prolyl 4-hydroxylase, alpha polypeptide I  
prolyl 4-hydroxylase, alpha polypeptide II  
poly(A) binding protein, cytoplasmic 4 (inducible form)  
platelet-activating factor acetylhydrolase, isoform Ib, subunit 1 (45kDa)

propionyl Coenzyme A carboxylase, beta polypeptide  
protocadherin 12  
protocadherin beta 14  
proprotein convertase subtilisin/kexin type 6  
prenylcysteine oxidase 1  
phosphodiesterase 7B  
platelet derived growth factor D  
platelet derived growth factor D  
protein disulfide isomerase family A, member 3  
PDZ and LIM domain 7 (enigma)  
PDS5, regulator of cohesion maintenance, homolog B (*S. cerevisiae*)  
phosphoprotein enriched in astrocytes 15  
phosphoprotein enriched in astrocytes 15  
phosphofructokinase, liver  
phosphofructokinase, liver  
profilin 2  
phosphoglycerate mutase 2 (muscle)  
post-GPI attachment to proteins 2  
phosphoglucomutase 5  
prohibitin  
PHD finger protein 10  
pleckstrin homology-like domain, family A, member 3  
phosphatase, orphan 2  
putative homeodomain transcription factor 2  
phosphatidylinositol glycan anchor biosynthesis, class Y-like  
phosphatidylserine decarboxylase  
phosphatidylinositol transfer protein, alpha  
protein kinase (cAMP-dependent, catalytic) inhibitor alpha  
pyruvate kinase, muscle  
phospholipase A2, group V  
phospholipase D family, member 3  
plectin 1, intermediate filament binding protein 500kDa  
procollagen-lysine 1, 2-oxoglutarate 5-dioxygenase 1  
plexin D1  
prostate transmembrane protein, androgen induced 1  
polymerase (DNA-directed), epsilon 4 (p12 subunit)  
polymerase (DNA-directed), epsilon 4 (p12 subunit)  
periostin, osteoblast specific factor  
phosphatidic acid phosphatase type 2 domain containing 3  
protein phosphatase 1, regulatory (inhibitor) subunit 12A  
protein phosphatase 1, regulatory (inhibitor) subunit 14C  
protein phosphatase 1, regulatory (inhibitor) subunit 14C  
protein phosphatase 1, regulatory (inhibitor) subunit 16B  
protein phosphatase 1, regulatory (inhibitor) subunit 3C  
protein phosphatase 2 (formerly 2A), regulatory subunit B, alpha isoform  
protein phosphatase 2 (formerly 2A), regulatory subunit B", alpha  
protein phosphatase 2 (formerly 2A), regulatory subunit B", alpha  
protein phosphatase 2, regulatory subunit B', gamma isoform  
palmitoyl-protein thioesterase 1

PRELI domain containing 1  
proline/arginine-rich end leucine-rich repeat protein  
protein-kinase, interferon-inducible double stranded RNA dependent inhibitor, repressor of  
protein kinase, X-linked  
protein arginine methyltransferase 2  
protein arginine methyltransferase 5  
prion protein  
proline rich Gla (G-carboxyglutamic acid) 3 (transmembrane)  
prune homolog 2 (Drosophila)  
proteasome (prosome, macropain) subunit, alpha type, 4  
proteasome (prosome, macropain) 26S subunit, non-ATPase, 7  
proteasome (prosome, macropain) activator subunit 3 (PA28 gamma; Ki)  
proteasome (prosome, macropain) activator subunit 4  
phosphatase and tensin homolog  
phosphatase and tensin homolog  
prostaglandin reductase 2  
prostaglandin reductase 2  
PTK2B protein tyrosine kinase 2 beta  
protein tyrosine phosphatase type IVA, member 2  
protein tyrosine phosphatase-like (proline instead of catalytic arginine), member A  
pituitary tumor-transforming 1  
pituitary tumor-transforming 1  
pumilio homolog 2 (Drosophila)  
quaking homolog, KH domain RNA binding (mouse)  
RAB11 family interacting protein 3 (class II)  
RAB2A, member RAS oncogene family  
RAB38, member RAS oncogene family  
RAB8A, member RAS oncogene family  
rabaptin, RAB GTPase binding effector protein 1  
RAB guanine nucleotide exchange factor (GEF) 1  
RAD21 homolog (S. pombe)  
v-ral simian leukemia viral oncogene homolog A (ras related)  
receptor-associated protein of the synapse  
RAS guanyl releasing protein 2 (calcium and DAG-regulated)  
Ras association (RalGDS/AF-6) domain family member 3  
Ras association (RalGDS/AF-6) domain family member 3  
RNA binding motif protein 10  
RNA binding motif protein 18  
RNA binding motif protein 5  
RNA binding motif protein 6  
regulator of chromosome condensation (RCC1) and BTB (POZ) domain containing protein 2  
receptor accessory protein 5  
riboflavin kinase  
ring finger and WD repeat domain 2  
regulator of G-protein signaling 4  
Rho family GTPase 3  
ring finger protein 11  
ring finger protein 11  
ring finger protein 121

ring finger protein 213  
ring finger protein 214  
ring finger protein 5  
RNA guanylyltransferase and 5'-phosphatase  
Rho-associated, coiled-coil containing protein kinase 2  
retinitis pigmentosa 2 (X-linked recessive)  
retinitis pigmentosa GTPase regulator interacting protein 1  
ribosomal protein S6 kinase, 90kDa, polypeptide 2  
ribosomal protein S6 kinase, 90kDa, polypeptide 2  
ribonucleotide reductase M1  
radical S-adenosyl methionine domain containing 1  
radical S-adenosyl methionine domain containing 2  
Ras suppressor protein 1  
reticulon 4  
reticulon 4 interacting protein 1  
reticulon 4 receptor  
receptor (chemosensory) transporter protein 4  
ryanodine receptor 1 (skeletal)  
S100 calcium binding protein A10  
S100 calcium binding protein A16  
spastic ataxia of Charlevoix-Saguenay (sacsin)  
sterile alpha motif domain containing 4A  
secretory carrier membrane protein 4  
sodium channel, voltage-gated, type IV, beta  
syndecan 3  
succinate dehydrogenase complex assembly factor 2  
succinate dehydrogenase complex, subunit C, integral membrane protein, 15kDa  
serum deprivation response (phosphatidylserine binding protein)  
Sec23 homolog A (*S. cerevisiae*)  
selenoprotein T  
septin 11  
septin 8  
small EDRK-rich factor 2  
serine incorporator 1  
serpin peptidase inhibitor, clade F (alpha-2 antiplasmin, pigment epithelium derived factor), member 1  
serpin peptidase inhibitor, clade H (heat shock protein 47), member 1, (collagen binding protein 1)  
serpin peptidase inhibitor, clade H (heat shock protein 47), member 1, (collagen binding protein 1)  
SET domain and mariner transposase fusion gene  
splicing factor, arginine/serine-rich 1  
SH3 domain binding glutamic acid-rich protein  
SH3 domain containing 19  
SH3-domain GRB2-like endophilin B2  
SH3-domain kinase binding protein 1  
SH3-domain kinase binding protein 1  
sialic acid acetyltransferase  
SIN3 homolog B, transcription regulator (yeast)  
sirtuin (silent mating type information regulation 2 homolog) 5 (*S. cerevisiae*)  
v-ski sarcoma viral oncogene homolog (avian)  
SLAIN motif family, member 2

solute carrier family 25, member 26  
solute carrier family 25, member 26  
solute carrier family 25, member 44  
solute carrier family 31 (copper transporters), member 2  
solute carrier family 8 (sodium/calcium exchanger), member 1  
solute carrier family 8 (sodium/calcium exchanger), member 1  
solute carrier organic anion transporter family, member 5A1  
schlafen family member 5  
STE20-like kinase (yeast)  
sarcolemma associated protein  
small ArfGAP2  
SWI/SNF related, matrix associated, actin dependent regulator of chromatin, subfamily b, member 1  
SPARC related modular calcium binding 2  
SPARC related modular calcium binding 2  
smoothelin  
smoothelin-like 2  
SMAD specific E3 ubiquitin protein ligase 2  
SMAD specific E3 ubiquitin protein ligase 2  
synaptosomal-associated protein, 23kDa  
SNAP-associated protein  
small nuclear ribonucleoprotein D3 polypeptide 18kDa  
sorting nexin family member 27  
sorting nexin 9  
SP100 nuclear antigen  
secreted protein, acidic, cysteine-rich (osteonectin)  
secreted protein, acidic, cysteine-rich (osteonectin)  
SPARC-like 1 (hevin)  
sprouty-related, EVH1 domain containing 1  
serum response factor (c-fos serum response element-binding transcription factor)  
sarcalumenin  
SFRS protein kinase 2  
SFRS protein kinase 3  
single stranded DNA binding protein 3  
sarcospan (Kras oncogene-associated gene)  
signal sequence receptor, beta (translocon-associated protein beta)  
ST3 beta-galactoside alpha-2,3-sialyltransferase 2  
steroidogenic acute regulatory protein  
signal transducer and activator of transcription 2, 113kDa  
STEAP family member 3  
stress-induced-phosphoprotein 1  
serine/threonine kinase 16  
stomatin  
striatin, calmodulin binding protein 3  
suppressor of Ty 3 homolog (S. cerevisiae)  
surfeit 4  
synaptopodin 2  
synaptophysin-like 1  
transgelin 2  
TAO kinase 1

transcription elongation factor A (SII), 3  
Treacher Collins-Franceschetti syndrome 1  
t-complex-associated-testis-expressed 1  
trans-2,3-enoyl-CoA reductase  
trans-2,3-enoyl-CoA reductase  
tescalcin  
transferrin receptor (p90, CD71)  
transforming growth factor beta 1 induced transcript 1  
thymocyte nuclear protein 1  
TIA1 cytotoxic granule-associated RNA binding protein  
translocase of inner mitochondrial membrane 50 homolog (*S. cerevisiae*)  
transmembrane 9 superfamily member 2  
transmembrane 9 superfamily member 3  
transmembrane channel-like 7  
transmembrane and coiled-coil domain family 1  
transmembrane and coiled-coil domain family 2  
transmembrane protein 106A  
transmembrane protein 126B  
transmembrane protein 132A  
transmembrane protein 134  
transmembrane protein 141  
transmembrane protein 183A  
transmembrane protein 41B  
thymosin beta 10  
thymosin beta 10  
thymosin beta 4, X-linked  
thioredoxin-related transmembrane protein 2  
tumor necrosis factor, alpha-induced protein 1 (endothelial)  
translocase of outer mitochondrial membrane 40 homolog (yeast)-like  
tumor protein p53  
tumor protein p53 inducible protein 11  
tumor protein p53 inducible nuclear protein 2  
tropomyosin 1 (alpha)  
tropomyosin 3  
tropomyosin 4  
trafficking protein, kinesin binding 1  
tripartite motif-containing 34  
tripartite motif-containing 5  
tetraspanin 2  
tetraspanin 7  
tetraspanin 9  
tetratricopeptide repeat domain 14  
tetratricopeptide repeat domain 3  
tetratricopeptide repeat domain 3  
tetratricopeptide repeat domain 8  
titin  
titin  
tubulin, alpha 1a  
tubulin, alpha 8

twisted gastrulation homolog 1 (Drosophila)  
twisted gastrulation homolog 1 (Drosophila)  
thioredoxin reductase 2  
U2 small nuclear RNA auxiliary factor 1-like 4  
ubiquitin-like modifier activating enzyme 3  
ubiquitin-conjugating enzyme E2D 3 (UBC4/5 homolog, yeast)  
ubiquitin-conjugating enzyme E2F (putative)  
ubiquitin-conjugating enzyme E2L 3  
ubiquitin-conjugating enzyme E2L 3  
ubiquitin-conjugating enzyme E2N (UBC13 homolog, yeast)  
ubiquitin-like domain containing CTD phosphatase 1  
ubiquitin-like with PHD and ring finger domains 2  
unc-51-like kinase 2 (C. elegans)  
unc-51-like kinase 2 (C. elegans)  
ubiquinol-cytochrome c reductase complex chaperone  
ubiquinol-cytochrome c reductase, Rieske iron-sulfur polypeptide 1  
ubiquitin specific peptidase 15  
ubiquitin specific peptidase 15  
ubiquitin specific peptidase 24  
vasohibin 1  
vasodilator-stimulated phosphoprotein  
vascular cell adhesion molecule 1  
versican  
vimentin  
vacuolar protein sorting 13 homolog A (S. cerevisiae)  
vacuolar protein sorting 29 homolog (S. cerevisiae)  
vacuolar protein sorting 39 homolog (S. cerevisiae)  
vacuolar protein sorting 41 homolog (S. cerevisiae)  
von Willebrand factor A domain containing 1  
WW domain binding protein 1  
WD repeat domain 41  
WEE1 homolog (S. pombe)  
WAS/WASL interacting protein family, member 1  
WAS/WASL interacting protein family, member 1  
WD repeat domain, phosphoinositide interacting 1  
WD repeat domain, phosphoinositide interacting 1  
WNK lysine deficient protein kinase 1  
XIAP associated factor 1  
X-linked Kx blood group (McLeod syndrome)  
YY1 associated factor 2  
Yip1 interacting factor homolog A (S. cerevisiae)  
yippee-like 2 (Drosophila)  
tyrosine 3-monooxygenase/tryptophan 5-monooxygenase activation protein, theta polypeptide  
zinc finger, BED-type containing 4  
zinc finger and BTB domain containing 20  
zinc finger, AN1-type domain 6  
zinc finger protein 101  
zinc finger protein 161 homolog (mouse)  
zinc finger protein 386 (Kruppel-like)



zinc finger protein 239  
zinc finger protein 24  
zinc finger protein 24  
zinc finger protein 260  
zinc finger protein 260  
zinc finger protein 770  
zinc and ring finger 2

## mTERC heart increased 908 probe sets increased

### Entrez Gene Name

RIKEN cDNA 1110003O08 gene  
RIKEN cDNA 1700093J21 gene  
RIKEN cDNA 1810026B05 gene  
RIKEN cDNA 1810032O08 gene  
RIKEN cDNA 2310033F14 gene  
RIKEN cDNA 2310050B05 gene  
RIKEN cDNA 2310050B05 gene  
RIKEN cDNA 2410017P09 gene  
RIKEN cDNA 2810416G20 gene  
RIKEN cDNA 4633401B06 gene  
RIKEN cDNA 4833417J20 gene  
RIKEN cDNA 4921504P13 gene  
RIKEN cDNA 4930556L07 gene  
RIKEN cDNA 4932415G12 gene  
RIKEN cDNA 6330531I01 gene  
RIKEN cDNA 6430510B20 gene  
RIKEN cDNA 6720469N11 gene  
RIKEN cDNA 7120426M23 gene  
RIKEN cDNA 9430006E15 gene  
RIKEN cDNA 9430011C21 gene  
RIKEN cDNA 9430098F02 gene  
RIKEN cDNA 9530006C21 gene  
RIKEN cDNA 9630025H16 gene  
RIKEN cDNA A230048O21 gene  
RIKEN cDNA A230107N01 gene  
RIKEN cDNA A330048O09 gene  
RIKEN cDNA A930004J17 gene  
expressed sequence AA617406  
alanyl-tRNA synthetase  
ATP-binding cassette, sub-family A (ABC1), member 1  
ATP-binding cassette, sub-family A (ABC1), member 3  
ATP-binding cassette, sub-family A (ABC1), member 5  
ATP-binding cassette, sub-family A (ABC1), member 6  
ATP-binding cassette, sub-family C (CFTR/MRP), member 1  
ATP-binding cassette, sub-family F (GCN20), member 1  
ATP-binding cassette, sub-family G (WHITE), member 2  
actin binding LIM protein 1

acyl-Coenzyme A binding domain containing 4  
aconitase 2, mitochondrial  
acyl-CoA thioesterase 1  
acyl-CoA thioesterase 2  
activin A receptor, type IB  
ADAM metalloproteinase with thrombospondin type 1 motif, 3  
ArfGAP with dual PH domains 2  
adenylate cyclase 6  
adenylate cyclase 9  
alcohol dehydrogenase, iron containing, 1  
adiponectin receptor 2  
ADNP homeobox 2  
ArfGAP with FG repeats 2  
AHNAK nucleoprotein  
expressed sequence AI314604  
A kinase (PRKA) anchor protein 8-like  
alkB, alkylation repair homolog 3 (E. coli)  
alkB, alkylation repair homolog 3 (E. coli)  
ankyrin repeat and KH domain containing 1  
ankyrin repeat domain 33B  
adaptor-related protein complex 2, alpha 2 subunit  
adaptor-related protein complex 3, beta 1 subunit  
APEX nuclease (multifunctional DNA repair enzyme) 1  
apoptosis inhibitor 5  
apolipoprotein A-IV  
arginine and glutamate rich 1  
Rho GTPase activating protein 21  
Rho guanine nucleotide exchange factor (GEF) 17  
ariadne homolog 2 (Drosophila)  
ariadne homolog 2 (Drosophila)  
ADP-ribosylation factor-like 4A  
ADP-ribosylation-like factor 6 interacting protein 4  
ADP-ribosylation factor-like 8A  
arrestin domain containing 4  
ADP-ribosyltransferase 3  
ATPase family, AAA domain containing 3A  
ATPase, class V, type 10D  
ATPase type 13A1  
ATPase type 13A3  
ATPase, Na<sup>+</sup>/K<sup>+</sup> transporting, alpha 2 (+) polypeptide  
ATP synthase, H<sup>+</sup> transporting, mitochondrial F1 complex, alpha subunit 1, cardiac muscle  
ATP synthase, H<sup>+</sup> transporting, mitochondrial F1 complex, gamma polypeptide 1  
ATPase, H<sup>+</sup> transporting, lysosomal V0 subunit a1  
ATPase, H<sup>+</sup> transporting, lysosomal 13kDa, V1 subunit G1  
ATPase, H<sup>+</sup> transporting, lysosomal 50/57kDa, V1 subunit H  
ATR interacting protein  
expressed sequence AU014973  
expressed sequence AW555355

BCL2-like 11 (apoptosis facilitator)  
BCL2-like 13 (apoptosis facilitator)  
B-cell CLL/lymphoma 7A  
BCL2-associated transcription factor 1  
v-raf murine sarcoma viral oncogene homolog B1  
v-raf murine sarcoma viral oncogene homolog B1  
BRCA1 associated protein  
bromodomain containing 2  
bromodomain containing 8  
bromodomain and PHD finger containing, 1  
basic transcription factor 3  
BTG family, member 3  
BUD31 homolog (yeast)  
chromosome 10 open reading frame 119  
chromosome 11 open reading frame 30  
chromosome 11 open reading frame 52  
chromosome 11 open reading frame 60  
chromosome 12 open reading frame 45  
chromosome 12 open reading frame 5  
chromosome 12 open reading frame 72  
chromosome 14 open reading frame 126  
chromosome 15 open reading frame 24  
chromosome 16 open reading frame 70  
chromosome 17 open reading frame 103  
chromosome 17 open reading frame 75  
chromosome 19 open reading frame 2  
chromosome 19 open reading frame 2  
chromosome 19 open reading frame 50  
chromosome 19 open reading frame 53  
chromosome 1 open reading frame 107  
chromosome 1 open reading frame 107  
chromosome 1 open reading frame 128  
chromosome 1 open reading frame 131  
chromosome 1 open reading frame 151  
chromosome 20 open reading frame 108  
chromosome 21 open reading frame 91  
chromosome 22 open reading frame 25  
chromosome 22 open reading frame 40  
complement component 3  
chromosome 3 open reading frame 59  
chromosome 5 open reading frame 41  
chromosome 6 open reading frame 89  
chromosome 7 open reading frame 64  
chromosome 8 open reading frame 41  
RIKEN cDNA C920008N22 gene  
chromosome 9 open reading frame 114  
chromosome 9 open reading frame 5  
chromosome 9 open reading frame 75

calcium binding and coiled-coil domain 1  
calcium/calmodulin-dependent protein kinase kinase 2, beta  
calcium/calmodulin-dependent protein kinase kinase 2, beta  
cancer susceptibility candidate 3  
CASK interacting protein 2  
castor zinc finger 1  
cystathionine-beta-synthase  
chromobox homolog 3 (HP1 gamma homolog, Drosophila)  
chromobox homolog 7  
coiled-coil domain containing 82  
coiled-coil domain containing 86  
coiled-coil alpha-helical rod protein 1  
CD2-associated protein  
CD302 molecule  
CDC42 small effector 2  
cyclin-dependent kinase inhibitor 1A (p21, Cip1)  
cyclin-dependent kinase inhibitor 1A (p21, Cip1)  
cyclin-dependent kinase inhibitor 2C (p18, inhibits CDK4)  
CDP-diacylglycerol synthase (phosphatidate cytidyltransferase) 2  
complement factor H  
complement factor H  
complement factor H-related 2  
chromodomain helicase DNA binding protein 2  
chromodomain helicase DNA binding protein 7  
chromodomain helicase DNA binding protein 8  
choline kinase beta  
carbohydrate (chondroitin 6) sulfotransferase 3  
corepressor interacting with RBPJ, 1  
cold inducible RNA binding protein  
cirrhosis, autosomal recessive 1A (cirhin)  
cytokine inducible SH2-containing protein  
cardiotrophin-like cytokine factor 1  
claudin 1  
C-type lectin domain family 16, member A  
ceroid-lipofuscinosis, neuronal 6, late infantile, variant  
ClpX caseinolytic peptidase X homolog (E. coli)  
clathrin, light chain (Lca)  
clusterin  
cyclic nucleotide gated channel alpha 2  
connector enhancer of kinase suppressor of Ras 1  
catechol-O-methyltransferase  
catechol-O-methyltransferase  
coronin 6  
cleavage and polyadenylation specific factor 6, 68kDa  
carnitine palmitoyltransferase 1A (liver)  
carnitine acetyltransferase  
cereblon  
CREB regulated transcription coactivator 2

cold shock domain containing C2, RNA binding  
cold shock domain containing C2, RNA binding  
casein kinase 1, alpha 1  
casein kinase 1, epsilon  
casein kinase 2, beta polypeptide  
cleavage stimulation factor, 3' pre-RNA, subunit 1, 50kDa  
CTD (carboxy-terminal domain, RNA polymerase II, polypeptide A) phosphatase, subunit 1  
CTD (carboxy-terminal domain, RNA polymerase II, polypeptide A) small phosphatase 2  
cathepsin L2  
CUE domain containing 1  
CUE domain containing 1  
cutC copper transporter homolog (E. coli)  
chemokine (C-X-C motif) ligand 12 (stromal cell-derived factor 1)  
cytochrome P450, family 1, subfamily B, polypeptide 1  
cytochrome P450, family 2, subfamily D, polypeptide 6  
RIKEN cDNA D330005C11 gene  
death-domain associated protein  
DAZ associated protein 2  
dodecenoyl-Coenzyme A delta isomerase (3,2 trans-enoyl-Coenzyme A isomerase)  
dynactin 4 (p62)  
dopa decarboxylase (aromatic L-amino acid decarboxylase)  
DDHD domain containing 1  
DDR GK domain containing 1  
DEAD (Asp-Glu-Ala-Asp) box polypeptide 1  
DEAD (Asp-Glu-Ala-Asp) box polypeptide 1  
DEAD (Asp-Glu-Ala-Asp) box polypeptide 24  
DEAD (Asp-Glu-Ala-Asp) box polypeptide 24  
death effector domain containing 2  
diablo homolog (Drosophila)  
death inducer-obliterator 1  
discs, large (Drosophila) homolog-associated protein 4  
DNA (cytosine-5-)-methyltransferase 3 beta  
desmoglein 2  
desmoglein 2  
desmoglein 2  
desmoglein 2  
dystrobrevin binding protein 1  
dihydrouridine synthase 3-like (S. cerevisiae)  
dual specificity phosphatase 4  
dynein, cytoplasmic 1, light intermediate chain 1  
E4F transcription factor 1  
early B-cell factor 1  
enhancer of mRNA decapping 4  
EF-hand calcium binding domain 3  
elongation factor Tu GTP binding domain containing 2  
epidermal growth factor receptor (erythroblastic leukemia viral (v-erb-b) oncogene homolog, avian)  
EH-domain containing 4  
eukaryotic translation initiation factor 1

eukaryotic translation initiation factor 3, subunit C  
eukaryotic translation initiation factor 3, subunit C  
eukaryotic translation initiation factor 3, subunit C  
eukaryotic translation initiation factor 3, subunit F  
eukaryotic translation initiation factor 3, subunit G  
eukaryotic translation initiation factor 3, subunit I  
eukaryotic translation initiation factor 3, subunit I  
eukaryotic translation initiation factor 4A, isoform 1  
eukaryotic translation initiation factor 4E binding protein 1  
eukaryotic translation initiation factor 4E binding protein 1  
eukaryotic translation initiation factor 6  
ELK4, ETS-domain protein (SRF accessory protein 1)  
elongation factor RNA polymerase II  
elastin  
ectodermal-neural cortex (with BTB-like domain)  
ectonucleoside triphosphate diphosphohydrolase 4  
ectonucleoside triphosphate diphosphohydrolase 4  
erythrocyte membrane protein band 4.1 (elliptocytosis 1, RH-linked)  
erythrocyte membrane protein band 4.1 like 5  
EPH receptor A10  
epsin 2  
erbb2 interacting protein  
ERO1-like (*S. cerevisiae*)  
ERO1-like (*S. cerevisiae*)  
endothelial cell adhesion molecule  
ets variant 3  
ets variant 3  
exosome component 1  
coagulation factor X  
fatty acid binding protein 4, adipocyte  
Fas (TNFRSF6) associated factor 1  
family with sequence similarity 100, member B  
family with sequence similarity 126, member A  
family with sequence similarity 128, member B  
family with sequence similarity 134, member B  
family with sequence similarity 134, member B  
family with sequence similarity 135, member A  
family with sequence similarity 178, member A  
family with sequence similarity 21, member A  
family with sequence similarity 63, member A  
family with sequence similarity 76, member A  
Finkel-Biskis-Reilly murine sarcoma virus (FBR-MuSV) ubiquitously expressed  
fibrosin  
F-box protein 3  
F-box protein 31  
fem-1 homolog c (*C. elegans*)  
fibroblast growth factor receptor 1  
fibroblast growth factor (acidic) intracellular binding protein

flavin containing monooxygenase 2 (non-functional)  
formin binding protein 4  
fibronectin type III domain containing 8  
forkhead box C2 (MFH-1, mesenchyme forkhead 1)  
forkhead box J2  
forkhead box Q1  
FRY-like  
follistatin  
follistatin-like 4  
far upstream element (FUSE) binding protein 1  
GRB2-associated binding protein 1  
GRB2-associated binding protein 1  
phosphoribosylglycinamide formyltransferase, phosphoribosylglycinamide synthetase,  
GATA binding protein 2  
GATA binding protein 6  
GATA zinc finger domain containing 2B  
glucosaminyl (N-acetyl) transferase 2, I-branching enzyme (I blood group)  
glucosaminyl (N-acetyl) transferase 2, I-branching enzyme (I blood group)  
ganglioside-induced differentiation-associated-protein 10  
golgi associated, gamma adaptin ear containing, ARF binding protein 1  
GLI family zinc finger 3  
glyoxalase I  
glyoxalase I  
glyoxalase I  
glutaminase  
glutamate-ammonia ligase (glutamine synthetase)  
predicted gene 9853  
glucocorticoid modulatory element binding protein 2  
GDP-mannose pyrophosphorylase A  
guanine nucleotide binding protein (G protein), alpha 13  
guanine nucleotide binding protein (G protein), alpha inhibiting activity polypeptide 1  
guanine nucleotide binding protein (G protein), beta polypeptide 2-like 1  
guanine nucleotide binding protein-like 3 (nucleolar)  
gon-4-like (C. elegans)  
glypican 4  
glycerol-3-phosphate dehydrogenase 1 (soluble)  
G protein-coupled receptor 116  
G protein-coupled receptor 152  
G protein-coupled receptor 19  
G protein pathway suppressor 2  
GRP1 (general receptor for phosphoinositides 1)-associated scaffold protein  
G protein-coupled receptor kinase 6  
GrpE-like 2, mitochondrial (E. coli)  
glutathione S-transferase mu 5  
glutathione S-transferase mu 5  
glutathione S-transferase mu 5  
glycosyltransferase-like domain containing 1  
GTP binding protein 4

phosphoinositide-interacting regulator of transient receptor potential channels  
ribosomal protein L36a pseudogene 8  
headcase homolog (Drosophila)  
HECT domain containing 1  
histone cluster 1, H1c  
histone cluster 1, H1c  
heterogeneous nuclear ribonucleoprotein A1  
heterogeneous nuclear ribonucleoprotein K  
heterogeneous nuclear ribonucleoprotein K  
heterogeneous nuclear ribonucleoprotein L  
heterogeneous nuclear ribonucleoprotein D-like  
heparan sulfate 6-O-sulfotransferase 1  
hydroxysteroid (17-beta) dehydrogenase 7  
galectin-related protein  
HtrA serine peptidase 3  
isocitrate dehydrogenase 1 (NADP+), soluble  
isocitrate dehydrogenase 2 (NADP+), mitochondrial  
isocitrate dehydrogenase 2 (NADP+), mitochondrial  
intraflagellar transport 57 homolog (Chlamydomonas)  
insulin-like growth factor 1 receptor  
insulin-like growth factor 1 receptor  
interleukin 1 receptor, type I  
interleukin 6 receptor  
inhibitor of growth family, member 1  
inhibitor of growth family, member 5  
INO80 complex subunit D  
inositol polyphosphate-5-phosphatase K  
insulin receptor  
inositol hexakisphosphate kinase 1  
interleukin-1 receptor-associated kinase 3  
insulin receptor substrate 1  
insulin receptor substrate 2  
iroquois homeobox 3  
iron-sulfur cluster scaffold homolog (E. coli)  
integrin alpha FG-GAP repeat containing 2  
integrin, beta 1 (fibronectin receptor, beta polypeptide, antigen CD29 includes MDF2, MSK12)  
integrin, beta 5  
integrin, beta 5  
integrin, beta 5  
inter-alpha (globulin) inhibitor H3  
inositol 1,4,5-triphosphate receptor interacting protein  
Janus kinase 1  
junctophilin 1  
potassium channel modulatory factor 1  
potassium voltage-gated channel, Isk-related family, member 4  
potassium voltage-gated channel, subfamily F, member 1  
potassium voltage-gated channel, subfamily H (eag-related), member 2



KIAA0355  
KIAA0415  
KIAA0664  
KIAA0774  
KIAA0774  
KIAA1704  
kinesin family member 1B  
kinesin family member 1B  
Kruppel-like factor 9  
Kruppel-like factor 9  
Kruppel-like factor 9  
Kruppel-like factor 9  
kelch-like 24 (Drosophila)  
kelch-like 7 (Drosophila)  
kelch-like 7 (Drosophila)  
KRAB-A domain containing 1  
KRI1 homolog (S. cerevisiae)  
kinectin 1 (kinesin receptor)  
lactate dehydrogenase B  
lactate dehydrogenase B  
lactate dehydrogenase B  
lectin, galactoside-binding, soluble, 7  
lipoic acid synthetase  
LIM domains containing 1  
LIM domains containing 1  
lipopolysaccharide-induced TNF factor  
LMBR1 domain containing 1  
similar to hCG2036949  
ribosomal protein S18 pseudogene 5  
ribosomal protein S18 pseudogene 5  
hypothetical protein LOC255783  
ribosomal protein L10 pseudogene 16  
ribosomal protein L13 pseudogene 12  
ribosomal protein L13 pseudogene 12  
ribosomal protein L13 pseudogene 12  
lipoprotein lipase  
leucine-rich alpha-2-glycoprotein 1  
low density lipoprotein receptor-related protein 10  
low density lipoprotein receptor-related protein 4  
low density lipoprotein receptor-related protein associated protein 1  
low density lipoprotein receptor-related protein associated protein 1  
leucine rich repeat containing 8 family, member A  
lanosterol synthase (2,3-oxidosqualene-lanosterol cyclase)  
LYR motif containing 4  
leucine zipper, putative tumor suppressor 2  
MAF1 homolog (S. cerevisiae)  
metastasis associated lung adenocarcinoma transcript 1 (non-protein coding)

mitogen-activated protein kinase kinase 3  
microtubule-associated protein 7  
membrane-associated ring finger (C3HC4) 7  
membrane-associated ring finger (C3HC4) 7  
MAP/microtubule affinity-regulating kinase 4  
matrin 3  
methylcrotonoyl-Coenzyme A carboxylase 1 (alpha)  
minichromosome maintenance complex component 3  
minichromosome maintenance complex component 7  
mast cell protease 8  
microspherule protein 1  
MyoD family inhibitor  
mediator complex subunit 1  
mediator complex subunit 15  
mediator complex subunit 15  
mediator complex subunit 16  
myocyte enhancer factor 2D  
Meis homeobox 2  
methionyl aminopeptidase 2  
methyltransferase like 1  
MAP kinase interacting serine/threonine kinase 2  
makorin ring finger protein 2  
myeloid/lymphoid or mixed-lineage leukemia 4  
myeloid/lymphoid or mixed-lineage leukemia (trithorax homolog, Drosophila); translocated to, 10  
myeloid/lymphoid or mixed-lineage leukemia (trithorax homolog, Drosophila); translocated to, 6  
MLX interacting protein  
matrix metalloproteinase 14 (membrane-inserted)  
matrix metalloproteinase 3 (stromelysin 1, progelatinase)  
MOCO sulphurase C-terminal domain containing 2  
MPV17 mitochondrial membrane protein-like 2  
myelin protein zero-like 1  
mitochondrial ribosomal protein S10  
mitochondrial ribosomal protein S9  
MSTP150  
metallothionein 1F  
methylenetetrahydrofolate dehydrogenase (NADP+ dependent) 1, methenyltetrahydrofolate  
myotubularin related protein 9  
metastasis suppressor 1  
myosin, heavy chain 6, cardiac muscle, alpha  
myosin, heavy chain 6, cardiac muscle, alpha  
myosin regulatory light chain interacting protein  
myosin VA (heavy chain 12, myosin)  
myomesin (M-protein) 2, 165kDa  
myomesin (M-protein) 2, 165kDa  
N-6 adenine-specific DNA methyltransferase 1 (putative)  
neural cell adhesion molecule 1  
nuclear receptor co-repressor 1

NIMA (never in mitosis gene a)-related kinase 7  
nuclear factor (erythroid-derived 2)-like 2  
nuclear factor of kappa light polypeptide gene enhancer in B-cells inhibitor, alpha  
nuclear factor of kappa light polypeptide gene enhancer in B-cells inhibitor, alpha  
nuclear factor of kappa light polypeptide gene enhancer in B-cells inhibitor, alpha  
nuclear factor of kappa light polypeptide gene enhancer in B-cells inhibitor, beta  
nuclear factor of kappa light polypeptide gene enhancer in B-cells inhibitor, zeta  
nuclear factor related to kappaB binding protein  
nerve growth factor receptor (TNFRSF16) associated protein 1  
NHP2 ribonucleoprotein homolog (yeast)  
nidogen 1  
ninjurin 1  
nischarin  
nischarin  
nischarin  
NK2 transcription factor related, locus 5 (Drosophila)  
N-myristoyltransferase 2  
nicotinamide nucleotide transhydrogenase  
NOP56 ribonucleoprotein homolog (yeast)  
nucleoside phosphorylase  
nucleoside phosphorylase  
nuclear protein, ataxia-telangiectasia locus  
neuronal pentraxin receptor  
nuclear receptor subfamily 2, group C, member 2  
nebulin-related anchoring protein  
nuclear receptor binding protein 2  
nurim (nuclear envelope membrane protein)  
neurexin 2  
nuclear receptor binding SET domain protein 1  
netrin 1  
negative regulator of ubiquitin-like proteins 1  
nucleotide binding protein 2 (MinD homolog, E. coli)  
ornithine decarboxylase antizyme 2  
outer dense fiber of sperm tails 2  
opioid receptor, mu 1  
optineurin  
origin recognition complex, subunit 6 like (yeast)  
osteosarcoma amplified 9, endoplasmic reticulum lectin  
osteosarcoma amplified 9, endoplasmic reticulum lectin  
oxysterol binding protein  
poly(A) binding protein, nuclear 1  
poly(A)binding protein nuclear-like 1  
PAN2 poly(A) specific ribonuclease subunit homolog (S. cerevisiae)  
pantothenate kinase 1  
pantothenate kinase 2  
poly (ADP-ribose) polymerase family, member 4  
POZ (BTB) and AT hook containing zinc finger 1

pre-B-cell leukemia homeobox interacting protein 1  
poly(rC) binding protein 2  
PDGFA associated protein 1  
pyruvate dehydrogenase kinase, isozyme 1  
pyruvate dehydrogenase kinase, isozyme 1  
pyruvate dehydrogenase phosphatase regulatory subunit  
pyruvate dehydrogenase phosphatase regulatory subunit  
pyridoxal-dependent decarboxylase domain containing 1  
PDZ domain containing 2  
PDZ domain containing 2  
period homolog 1 (Drosophila)  
phosphoglycolate phosphatase  
progesterone receptor membrane component 2  
PHD finger protein 15  
PHD finger protein 3  
phosphorylase kinase, gamma 2 (testis)  
phosphatase, orphan 2  
phosphatidylinositol 4-kinase type 2 alpha  
protein inhibitor of activated STAT, 2  
progesterone immunomodulatory binding factor 1  
phosphoinositide-3-kinase, regulatory subunit 2 (beta)  
pim-3 oncogene  
phosphatidylinositol-5-phosphate 4-kinase, type II, beta  
phosphatidylinositol transfer protein, beta  
phosphatidylinositol transfer protein, beta  
PBX/knotted 1 homeobox 1  
plakophilin 2  
pleiomorphic adenoma gene-like 2  
phospholipase C-like 2  
pleckstrin homology domain containing, family G (with RhoGef domain) member 3  
perilipin 3  
perilipin 4  
phospholipid scramblase 1  
plexin B2  
patatin-like phospholipase domain containing 2  
patatin-like phospholipase domain containing 7  
polymerase (DNA-directed), delta interacting protein 3  
polymerase (RNA) I polypeptide D, 16kDa  
polymerase (RNA) II (DNA directed) polypeptide A, 220kDa  
polymerase (RNA) III (DNA directed) polypeptide A, 155kDa  
P450 (cytochrome) oxidoreductase  
periphilin 1  
protein phosphatase 1, regulatory (inhibitor) subunit 13 like  
protein phosphatase 1, regulatory (inhibitor) subunit 13 like  
protein phosphatase 1, regulatory (inhibitor) subunit 13 like  
protein phosphatase 2 (formerly 2A), catalytic subunit, alpha isoform  
PQ loop repeat containing 1

protein kinase, AMP-activated, beta 1 non-catalytic subunit  
protein kinase, AMP-activated, gamma 1 non-catalytic subunit  
protein kinase C, eta  
prominin 1  
PRP19/PSO4 pre-mRNA processing factor 19 homolog (S. cerevisiae)  
PRP19/PSO4 pre-mRNA processing factor 19 homolog (S. cerevisiae)  
PRP40 pre-mRNA processing factor 40 homolog B (S. cerevisiae)  
proline-rich coiled-coil 1  
phosphoserine aminotransferase 1  
pregnancy specific glycoprotein 16  
proteasome (prosome, macropain) 26S subunit, non-ATPase, 4  
pentatricopeptide repeat domain 1  
prostaglandin-endoperoxide synthase 1 (prostaglandin G/H synthase and cyclooxygenase)  
protein tyrosine phosphatase, receptor type, N polypeptide 2  
PWP1 homolog (S. cerevisiae)  
PWP2 periodic tryptophan protein homolog (yeast)  
quaking homolog, KH domain RNA binding (mouse)  
serine/threonine-protein kinase QSK  
serine/threonine-protein kinase QSK  
recombination activating gene 1 activating protein 1  
RAN binding protein 3  
Rap guanine nucleotide exchange factor (GEF) 3  
RASD family, member 2  
RASD family, member 2  
RNA binding motif protein 20  
RNA binding motif protein 25  
RNA binding motif protein 33  
RNA binding motif protein 39  
RNA binding motif protein 42  
RNA binding motif protein 43  
RNA binding motif protein, X-linked  
RNA binding protein with multiple splicing  
RNA binding protein with multiple splicing  
REST corepressor 3  
v-rel reticuloendotheliosis viral oncogene homolog A (avian)  
RALBP1 associated Eps domain containing 1  
RE1-silencing transcription factor  
RE1-silencing transcription factor  
REV3-like, catalytic subunit of DNA polymerase zeta (yeast)  
Ras homolog enriched in brain like 1  
RAP1 interacting factor homolog (yeast)  
RIO kinase 3 (yeast)  
RIO kinase 3 (yeast)  
Ras-like without CAAX 1

ring finger protein 166  
ribonuclease/angiogenin inhibitor 1  
RNA (guanine-7-) methyltransferase  
RAR-related orphan receptor A  
ribosomal protein L10A  
ribosomal protein L12  
ribosomal protein L13a  
ribosomal protein L13a  
ribosomal protein L13a  
ribosomal protein L18a  
ribosomal protein L19  
ribosomal protein L27  
ribosomal protein L27a  
ribosomal protein L28  
ribosomal protein L29  
ribosomal protein L29  
ribosomal protein L29  
ribosomal protein L30  
ribosomal protein L31  
ribosomal protein L32  
ribosomal protein L35  
ribosomal protein L36  
ribosomal protein L36  
ribosomal protein L36  
ribosomal protein L38  
ribosomal protein L5  
ribosomal protein L6  
ribosomal protein L9  
ribonuclease P/MRP 25kDa subunit  
regulation of nuclear pre-mRNA domain containing 2  
ribosomal protein S12  
ribosomal protein S12  
ribosomal protein S13  
ribosomal protein S14  
ribosomal protein S16  
ribosomal protein S16  
ribosomal protein S21  
ribosomal protein S24  
ribosomal protein S27  
ribosomal protein S27  
ribosomal protein S28  
ribosomal protein S28  
ribosomal protein S28  
ribosomal protein S5  
ribosomal protein S6  
Ras-related GTP binding D

SET binding factor 2  
strawberry notch homolog 2 (*Drosophila*)  
suprabasin  
sodium channel, voltage-gated, type VII, alpha  
sodium channel, voltage-gated, type VII, alpha  
syndecan 4  
selenium binding protein 1  
selenium binding protein 1  
sema domain, immunoglobulin domain (Ig), short basic domain, secreted, (semaphorin) 3G  
serpin peptidase inhibitor, clade A (alpha-1 antiproteinase, antitrypsin), member 7  
SEC14 and spectrin domains 1  
SET domain containing 1B  
SET domain containing 1B  
SET domain containing 2  
splicing factor 1  
splicing factor 3b, subunit 2, 145kDa  
splicing factor 4  
Scm-like with four mbt domains 1  
splicing factor, arginine/serine-rich 2, interacting protein  
splicing factor, arginine/serine-rich 5  
splicing factor, arginine/serine-rich 6  
splicing factor, arginine/serine-rich 6  
splicing factor, arginine/serine-rich 8 (suppressor-of-white-apricot homolog, *Drosophila*)  
sideroflexin 2  
SHANK-associated RH domain interactor  
shroom family member 2  
seven in absentia homolog 1 (*Drosophila*)  
SID1 transmembrane family, member 2  
sirtuin (silent mating type information regulation 2 homolog) 7 (*S. cerevisiae*)  
solute carrier family 10 (sodium/bile acid cotransporter family), member 6  
solute carrier family 25, member 28  
solute carrier family 25 (mitochondrial carrier; phosphate carrier), member 3  
solute carrier family 25 (mitochondrial carrier; adenine nucleotide translocator), member 4  
solute carrier family 2 (facilitated glucose transporter), member 8  
solute carrier family 30, member 10  
solute carrier family 38, member 1  
solute carrier family 38, member 1  
solute carrier family 3 (activators of dibasic and neutral amino acid transport), member 2  
solute carrier family 41, member 1  
solute carrier family 45, member 4  
solute carrier family 6 (neurotransmitter transporter, creatine), member 8  
solute carrier family 7 (cationic amino acid transporter, y<sup>+</sup> system), member 5  
solute carrier organic anion transporter family, member 2A1  
SLU7 splicing factor homolog (*S. cerevisiae*)  
SMAD family member 4  
small ArfGAP 1

SET and MYND domain containing 4  
snail homolog 1 (Drosophila)  
small nuclear ribonucleoprotein 70kDa (U1)  
small nuclear ribonucleoprotein polypeptide A'  
small nuclear ribonucleoprotein polypeptide N  
SNW domain containing 1  
sorting nexin 33  
suppressor of cytokine signaling 2  
suppressor of cytokine signaling 2  
superoxide dismutase 1, soluble  
SON DNA binding protein  
SON DNA binding protein  
SRY (sex determining region Y)-box 10  
spen homolog, transcriptional regulator (Drosophila)  
spastic paraplegia 7 (pure and complicated autosomal recessive)  
spinster homolog 2 (Drosophila)  
steroid receptor RNA activator 1  
sterol regulatory element binding transcription factor 1  
sorcin  
spermidine synthase  
signal recognition particle 68kDa  
serine/arginine repetitive matrix 1  
slingshot homolog 3 (Drosophila)  
ST3 beta-galactoside alpha-2,3-sialyltransferase 3  
suppression of tumorigenicity 5  
ST8 alpha-N-acetyl-neuraminide alpha-2,8-sialyltransferase 1  
SH3 and cysteine rich domain  
stromal antigen 1  
suppressor of Ty 16 homolog (S. cerevisiae)  
suppressor of Ty 5 homolog (S. cerevisiae)  
suppressor of variegation 4-20 homolog 1 (Drosophila)  
syncollin  
synaptogyrin 1  
SYS1 Golgi-localized integral membrane protein homolog (S. cerevisiae)  
synaptotagmin XVII  
TATA box binding protein (TBP)-associated factor, RNA polymerase I, C, 110kDa  
TBC1 domain family, member 15  
TBC1 domain family, member 20  
TBC1 domain family, member 4  
tubulin folding cofactor E-like  
tubulin folding cofactor E-like  
T-box 4  
transcription elongation factor B (SIII), polypeptide 3 (110kDa, elongin A)  
transcription factor 25 (basic helix-loop-helix)  
transcription factor 25 (basic helix-loop-helix)  
tensin like C1 domain containing phosphatase (tensin 2)



thymidine kinase 2, mitochondrial  
tousled-like kinase 2  
transmembrane 9 superfamily member 2  
transmembrane and coiled-coil domains 4  
transmembrane emp24 domain trafficking protein 2  
transmembrane protein 159  
transmembrane protein 203  
transmembrane protein 5  
transmembrane protein 71  
thymopoietin  
transmembrane and tetratricopeptide repeat containing 1  
transmembrane and tetratricopeptide repeat containing 1  
thioredoxin-related transmembrane protein 1  
thioredoxin-related transmembrane protein 1  
tankyrase, TRF1-interacting ankyrin-related ADP-ribose polymerase  
troponin T type 2 (cardiac)  
trinucleotide repeat containing 6A  
tensin 1  
transducer of ERBB2, 2  
transducer of ERBB2, 2  
target of EGR1, member 1 (nuclear)  
target of myb1 (chicken)  
tumor protein p53 inducible nuclear protein 1  
tumor protein D52-like 1  
tripartite motif-containing 28  
thyroid hormone receptor interactor 10  
TRM1 tRNA methyltransferase 1 homolog (*S. cerevisiae*)  
TRM1 tRNA methyltransferase 1 homolog (*S. cerevisiae*)  
tRNA methyltransferase 6 homolog (*S. cerevisiae*)  
transient receptor potential cation channel, subfamily C, member 4 associated protein  
tetraspanin 4  
tetratricopeptide repeat domain 39B  
tetratricopeptide repeat domain 5  
tubulin tyrosine ligase-like family, member 11  
titin  
twinfilin, actin-binding protein, homolog 2 (*Drosophila*)  
TWIST neighbor  
thioredoxin-like 4A  
ubiquitin A-52 residue ribosomal protein fusion product 1  
ubiquitin A-52 residue ribosomal protein fusion product 1

upstream transcription factor 2, c-fos interacting  
ubiquitin specific peptidase 2  
ubiquitin specific peptidase 2  
ubiquitin specific peptidase 30  
ubiquitin specific peptidase 30  
ubiquitin specific peptidase 36  
ubiquitin specific peptidase 54  
ubiquitin specific peptidase 7 (herpes virus-associated)  
vascular endothelial zinc finger 1  
vacuolar protein sorting 11 homolog (S. cerevisiae)  
vacuolar protein sorting 13 homolog D (S. cerevisiae)  
vacuolar protein sorting 26 homolog A (S. pombe)  
vacuolar protein sorting 37 homolog C (S. cerevisiae)  
WAS protein family homolog 1  
WW domain binding protein 2  
WD repeat domain 43  
WD repeat domain 74  
WD repeat domain 85  
Wolf-Hirschhorn syndrome candidate 1  
widely interspaced zinc finger motifs  
wingless-type MMTV integration site family, member 11  
Wilms tumor 1 interacting protein  
WW and C2 domain containing 2  
xeroderma pigmentosum, complementation group C  
exportin 5  
Yip1 domain family, member 1  
Yip1 domain family, member 4  
YjeF N-terminal domain containing 3  
yrdC domain containing (E. coli)  
zinc finger and BTB domain containing 22  
zinc finger and BTB domain containing 33  
zinc finger, CCHC domain containing 11  
zinc finger, CCHC domain containing 14  
zinc finger, CCHC domain containing 3  
zinc finger, DHHC-type containing 4  
zinc finger, FYVE domain containing 27  
zinc finger with KRAB and SCAN domains 5  
zinc finger, MYM-type 5  
zinc finger protein 143  
zinc finger protein 251  
zinc finger protein 326  
zinc finger protein 346  
zinc finger protein 384  
zinc finger protein 394  
zinc finger protein 436  
zinc finger protein 496

**Supplemental Table 6****Locus Name**

TATA-box-binding protein

 $\beta$ -Actin

Cytochrome C (1st pair)

Cytochrome C (2nd pair)

ATP synthase (1st pair)

ATP synthase (2nd pair)

cytochrome c oxidase subunit 6 (1st pair)

cytochrome c oxidase subunit 6 (2nd pair)

cytochrome c oxidase subunit 5a

PGC1 $\alpha$  (1st pair)PGC1 $\alpha$  (2nd pair)PGC1 $\beta$  (1st pair)PGC1 $\beta$  (2nd pair)ERR $\alpha$ 

NRF-1

TFAM

**Primer Sequences**

forward - 5' CCCCACAACCTCTTCCATTCT 3'

reverse - 5' GCAGGAGTGATAGGGGTCAT 3'

forward - 5' GACATGGAGAAGATCTGGCA 3'

reverse - 5' GGTCTCAAACATGATCTGGGT 3'

forward - 5' ACCAAATCTCCACGGTCTGTT 3'

reverse - 5' GGATTCTCCAAATACTCCATCAG 3'

forward - 5' CAACTTTCCAGGGCACATTT 3'

reverse - 5' GCTGGCCTTGAACCTCAGAAA 3'

forward - 5' TCTCGGCCAGAGACTAGGAC 3'

reverse - 5' GCACCTGCACCAATGAATTT 3'

forward - 5' CAGGTGCTGCAACAGTAGGA 3'

reverse - 5' GCTTCAGACAAGGCCAAATCC 3'

forward - 5' GTAACGCTACTCCGGGACAA 3'

reverse - 5' TCCAGGTAGTTCTGCCAACA 3'

forward - 5' AGTCCCTCTGTCCCGTGTC 3'

reverse - 5' ATATGCTGAGGTCCCCCTTT 3'

forward - 5' CTCGTCAGCCTCAGCCAGT 3'

reverse - 5' TAGCAGCGAATGGAACAGAC 3'

forward - 5' CCCTGCCATTGTTAAGACC 3'

reverse - 5' TGCTGCTGTTCCCTGTTTTT 3'

forward - 5' GAGTCTGAAAGGGCCAAACA 3'

reverse - 5' TGCATTCTCAATTTACCA 3'

forward - 5' GGACGCCAGTGACTTTGACT 3'

reverse - 5' TTCATCCAGTTCTGGGAAGG 3'

forward - 5' GCTCTGATCACTGCCCTTAC 3'

reverse - 5' TGTATACCACACGGCCTTCA 3'

forward - 5' CCTCTTGAAGAAGGCTTTGCA 3'

reverse - 5' GCAGGGCAGTGGGAAGCTA 3'

forward - 5' GAACTGCCAACCACAGTCAC 3'

reverse - 5' TTTGTTCCACCTCTCCATCA 3'

forward - 5' AATGTGGAGCGTGCTAAAAGC 3'

reverse - 5' GCTGAACGAGGTCTTTTTGGT 3'

mitochondrial DNA quantification by qPCR

**Mitochondrial primers**

COXIF

CTGAGCGGGAATAGTGGGTA

COXIR

TGGGGCTCCGATTATTAGTG

CytBF

ATTCCTTCATGTCGGACGAG

CytBR

ACTGAGAAGCCCCCTCAAAT

**Genomic primers**

H19R

GTCCACGAGACCAATGACTG

H19F

GTACCCACCTGTCGTCC

B1globinF

GCACCTGACTGATGCTGAGAA

B1globinR

TTCATCGGCGTTCACCTTTCC

### ChIP primers

PGC-1  $\alpha$  -564  
TCATGGATGTGCTGGGTTAG- forward  
CAGATGGTTGCTTGCACTAGA- reverse

PGC-1  $\alpha$  -954  
CCACGGAAAGAATCATGAGG- forward  
AACCGCCACATTTGTTTAGG- reverse

PGC-1 $\beta$  -1616  
AACCGTCCAGCCTTTTCAGT- forward  
TCAGCCTCCCTTGTACCTTG-reverse

PGC-1 $\beta$  -1030  
GTGCCGGAACAAAAGGTAGT-forward  
CCAGCACGCTTTTAAGGAAC- reverse
